# Supplementary material for: Beyond Quiescent and Active: Intermediate Microglial Transcriptomic States in a Mouse Model of Down Syndrome
Source: Int J Mol Sci. 2024 Mar 14;25(6):3289. doi: 10.3390/ijms25063289 (PMC10970051; doi:10.3390/ijms25063289)
Supplement: Supplementary file 1 [file ijms-25-03289-s001.zip]

Archive with 5 entries (5 files):
- Supplementary Figure S5BC. Cell countings Microglia.xlsx
- Supplementary Material_Microglia.pdf
- Supplementary table S1_DEGs.xlsx
- Supplementary table S2_markers.xlsx
- Supplementary Table S3.xlsx
