# Supplementary material for: Beyond Quiescent and Active: Intermediate Microglial Transcriptomic States in a Mouse Model of Down Syndrome
Source: Int J Mol Sci. 2024 Mar 14;25(6):3289. doi: 10.3390/ijms25063289 (PMC10970051; doi:10.3390/ijms25063289)
Supplement: Supplementary file 1 [file ijms-25-03289-s001.zip › Supplementary Figure S5BC. Cell countings Microglia.xlsx]

## Sheet: Sheet1
		Area
		48975	TS
		Iba1+	CD68	Area (mm3)
	Section 1	40	37	0.149957	266.743	246.737	92.5
	Section 2	49	34	0.162267	301.971	209.531	69.3878
	Section 3	54	40	0.165358	326.564	241.899	74.0741
		48976	WT
		Iba1+	CD68	Area (mm3)
	Section 1	48	42	0.164821	291.225	254.822	87.5
	Section 2	39	33	0.146185	266.785	225.741	84.6154
	Section 3	41	29	0.163357	250.984	177.525	70.7317
		48972	TS
		Iba1+	CD68	Area (mm3)
	Section 1	29	28	0.165081	175.671	169.614	96.5517
	Section 2	34	28	0.1535	221.498	182.41	82.3529
	Section 3	37	33	0.152537	242.564	216.341	89.1892
		46924	TS
		Iba1+	CD68	Area (mm3)
	Section 1	29	26	0.147396	196.749	176.396	89.6552
	Section 2	47	41	0.159868	293.993	256.462	87.234
	Section 3	29	24	0.141373	205.131	169.764	82.7586
		46925	WT
		Iba1+	CD68	Area (mm3)
	Section 1	38	32	0.157883	240.685	202.682	84.2105
	Section 2	28	27	0.149191	187.679	180.976	96.4286
	Section 3	46	44	0.149349	308.003	294.612	95.6522
		48974	WT
		Iba1+	CD68	Area (mm3)
	Section 1	38	34	0.149979	253.369	226.698	89.4737
	Section 2	37	35	0.143837	257.236	243.331	94.5946
	Section 3	41	38	0.140912	290.962	269.672	92.6829
