# Supplementary material for: Beyond Quiescent and Active: Intermediate Microglial Transcriptomic States in a Mouse Model of Down Syndrome
Source: Int J Mol Sci. 2024 Mar 14;25(6):3289. doi: 10.3390/ijms25063289 (PMC10970051; doi:10.3390/ijms25063289)
Supplement: Supplementary file 1 [file ijms-25-03289-s001.zip › Supplementary table S1_DEGs.xlsx]

## Sheet: Sheet1
Supplementary Table 1. Differentially expressed genes in individual cell types
Cell type	genes	avg_log2FC	pct.1	pct.2	p_val	p_val_adj
Astrocytes	Cmss1	1.32077	0.109	0.28	1.10137e-55	2.37545e-51
Astrocytes	Wdr17	1.05123	0.157	0.304	5.55595e-35	1.19831e-30
Astrocytes	Son	1.02911	0.979	0.997	0	0
Astrocytes	Npas3	0.9574	0.242	0.392	7.22723e-35	1.55877e-30
Astrocytes	Gm35188	0.825078	0.113	0.265	6.71562e-40	1.44843e-35
Astrocytes	Gm20388	0.825071	0.11	0.264	8.23905e-43	1.777e-38
Astrocytes	Csgalnact2	0.813489	0.021	0.123	2.4934e-41	5.37776e-37
Astrocytes	Kcnd2	0.800873	0.101	0.22	2.57719e-28	5.55849e-24
Astrocytes	Gpc5	0.798943	0.428	0.527	1.07473e-21	2.31797e-17
Astrocytes	Fabp7	0.793601	0.137	0.299	7.09164e-41	1.52952e-36
Astrocytes	Hdac9	0.792479	0.132	0.269	1.6275e-32	3.51019e-28
Astrocytes	Atp5o	0.78033	0.076	0.22	1.69381e-44	3.6532e-40
Astrocytes	Tmem181a	0.748501	0.055	0.223	7.85614e-58	1.69441e-53
Astrocytes	Fgf14	0.7441	0.1	0.215	9.96008e-27	2.14819e-22
Astrocytes	Rora	0.736916	0.276	0.388	2.77344e-22	5.98175e-18
Astrocytes	Gria1	0.733359	0.084	0.204	3.00536e-31	6.48197e-27
Astrocytes	Nlgn1	0.723556	0.243	0.367	8.62759e-25	1.8608e-20
Astrocytes	Il1rapl1	0.717186	0.19	0.354	9.60299e-36	2.07117e-31
Astrocytes	Tiam2	0.707269	0.123	0.293	5.31582e-45	1.14652e-40
Astrocytes	Arid1b	0.680854	0.127	0.285	1.12671e-39	2.4301e-35
Astrocytes	Ncam2	0.649415	0.147	0.284	1.90522e-29	4.10918e-25
Astrocytes	B3galt1	0.634028	0.191	0.327	4.6934e-27	1.01227e-22
Astrocytes	Ctnnd2	0.631218	0.408	0.533	1.58318e-27	3.41461e-23
Astrocytes	Cadm2	0.626303	0.307	0.429	4.03995e-23	8.71337e-19
Astrocytes	Macrod2	0.621723	0.109	0.235	8.91634e-30	1.92308e-25
Astrocytes	Kirrel3	0.616392	0.145	0.272	1.14639e-25	2.47253e-21
Astrocytes	Gpc6	0.61479	0.229	0.371	2.29449e-27	4.94876e-23
Astrocytes	Lrrc4c	0.610032	0.209	0.347	9.51871e-27	2.05299e-22
Astrocytes	Ptprt	0.583716	0.198	0.331	2.67779e-24	5.77546e-20
Astrocytes	Mgat4c	0.577668	0.093	0.209	1.12677e-27	2.43023e-23
Astrocytes	Pde4d	0.573461	0.11	0.236	3.95324e-29	8.52634e-25
Astrocytes	Ppp2r2b	0.571596	0.216	0.375	5.50211e-31	1.1867e-26
Astrocytes	Camk1d	0.562478	0.128	0.266	4.50922e-31	9.72549e-27
Astrocytes	Lsamp	0.55332	0.73	0.738	7.44698e-09	0.000160616
Astrocytes	Fhit	0.552714	0.07	0.174	8.15525e-27	1.75892e-22
Astrocytes	Csmd1	0.548682	0.175	0.304	1.62779e-23	3.51081e-19
Astrocytes	Pigk	0.540769	0.149	0.278	8.58067e-26	1.85068e-21
Astrocytes	Pcdh9	0.536068	0.419	0.513	4.01427e-20	8.65797e-16
Astrocytes	Maml2	0.532264	0.186	0.309	1.31136e-21	2.82834e-17
Astrocytes	Clybl	0.531964	0.106	0.24	2.24399e-32	4.83983e-28
Astrocytes	Efr3b	0.531028	0.168	0.318	1.83169e-30	3.95058e-26
Astrocytes	Sav1	0.523284	0.031	0.103	4.85984e-22	1.04817e-17
Astrocytes	Akap6	0.509114	0.081	0.191	4.03308e-27	8.69855e-23
Astrocytes	Nhsl1	0.505574	0.214	0.326	1.02684e-18	2.2147e-14
Astrocytes	Grid2	0.504122	0.232	0.355	2.87475e-20	6.20025e-16
Astrocytes	Dgkb	0.495744	0.349	0.47	5.55202e-22	1.19746e-17
Astrocytes	Grid1	0.4955	0.098	0.218	1.85943e-28	4.01043e-24
Astrocytes	Adgrl3	0.491571	0.343	0.453	1.24544e-18	2.68617e-14
Astrocytes	4930570B17Rik	0.490356	0.08	0.186	2.9941e-26	6.45768e-22
Astrocytes	Astn2	0.489491	0.093	0.209	2.20257e-27	4.75051e-23
Astrocytes	Rere	0.483369	0.169	0.292	2.94712e-21	6.35636e-17
Astrocytes	Luzp2	0.482585	0.39	0.489	1.49727e-14	3.22931e-10
Astrocytes	Dyrk1a	0.482042	0.107	0.23	1.65647e-27	3.57268e-23
Astrocytes	Adgrb3	0.481723	0.436	0.542	3.81052e-21	8.21853e-17
Astrocytes	Tox	0.480455	0.083	0.171	3.39462e-19	7.32152e-15
Astrocytes	Tenm3	0.476947	0.207	0.33	3.34166e-20	7.20728e-16
Astrocytes	Zfpm2	0.476471	0.156	0.282	3.6894e-23	7.9573e-19
Astrocytes	Itih3	0.475541	0.229	0.364	1.06712e-21	2.30156e-17
Astrocytes	Rgs7	0.471248	0.116	0.211	3.63089e-18	7.8311e-14
Astrocytes	Grm3	0.469993	0.243	0.365	1.13424e-20	2.44634e-16
Astrocytes	Gm48742	0.467632	0.088	0.191	1.84072e-23	3.97007e-19
Astrocytes	Dcc	0.466601	0.047	0.11	2.34646e-15	5.06085e-11
Astrocytes	Gli3	0.465205	0.185	0.304	3.21815e-20	6.94091e-16
Astrocytes	Fgf12	0.463595	0.074	0.179	8.33281e-26	1.79722e-21
Astrocytes	5031439G07Rik	0.462468	0.077	0.159	1.47326e-17	3.17752e-13
Astrocytes	Ncan	0.455936	0.198	0.303	1.0166e-15	2.19261e-11
Astrocytes	2900052N01Rik	0.450012	0.212	0.323	2.76306e-16	5.95937e-12
Astrocytes	Grip1	0.448179	0.049	0.128	3.82916e-21	8.25873e-17
Astrocytes	Itsn1	0.447028	0.226	0.371	5.2464e-24	1.13154e-19
Astrocytes	Nnat	0.44507	0.247	0.38	1.50487e-19	3.2457e-15
Astrocytes	Paxbp1	0.439463	0.139	0.286	2.50897e-30	5.41135e-26
Astrocytes	Ptprm	0.434859	0.105	0.207	2.95441e-21	6.37207e-17
Astrocytes	Vegfa	0.431376	0.497	0.65	5.01255e-21	1.08111e-16
Astrocytes	Sash1	0.428496	0.333	0.45	1.0241e-17	2.20877e-13
Astrocytes	Fgfr2	0.425153	0.275	0.393	4.73097e-17	1.02038e-12
Astrocytes	Gm11149	0.421714	0.046	0.142	2.21759e-28	4.78291e-24
Astrocytes	Grin2b	0.420526	0.209	0.354	4.70174e-24	1.01407e-19
Astrocytes	Scaf8	0.419724	0.123	0.246	3.28436e-25	7.08371e-21
Astrocytes	Gm44511	0.418184	0.017	0.121	8.19178e-44	1.7668e-39
Astrocytes	Ptprg	0.412784	0.132	0.237	4.17043e-19	8.99479e-15
Astrocytes	Mdga2	0.408459	0.369	0.453	1.79174e-13	3.86442e-09
Astrocytes	Pard3b	0.407423	0.143	0.258	7.53662e-21	1.6255e-16
Astrocytes	Agt	0.406732	0.079	0.132	2.82566e-09	6.09439e-05
Astrocytes	Tmtc2	0.406419	0.151	0.271	6.98234e-22	1.50595e-17
Astrocytes	Gm14964	0.40444	0.059	0.149	1.80116e-22	3.88474e-18
Astrocytes	Wwox	0.402287	0.126	0.228	5.19589e-18	1.12065e-13
Astrocytes	Cdk8	0.401633	0.191	0.314	1.82341e-19	3.93272e-15
Astrocytes	Nol4	0.401008	0.133	0.244	1.92972e-20	4.16202e-16
Astrocytes	Rgs20	0.400013	0.291	0.417	9.66924e-20	2.08546e-15
Astrocytes	Ehbp1	0.398965	0.169	0.278	3.97375e-18	8.57058e-14
Astrocytes	Plcb1	0.398128	0.26	0.358	5.86855e-14	1.26573e-09
Astrocytes	Plcl1	0.39656	0.111	0.214	2.06372e-20	4.45103e-16
Astrocytes	Ctnna2	0.393919	0.212	0.315	5.28764e-15	1.14044e-10
Astrocytes	Pcx	0.39348	0.067	0.164	9.85674e-24	2.1259e-19
Astrocytes	Kcnip3	0.391482	0.12	0.224	3.56316e-19	7.68502e-15
Astrocytes	Setbp1	0.39131	0.141	0.239	1.55725e-16	3.35867e-12
Astrocytes	Glis3	0.389174	0.134	0.258	2.31274e-23	4.98811e-19
Astrocytes	Nebl	0.38783	0.298	0.416	4.92953e-16	1.0632e-11
Astrocytes	Pcdh7	0.386396	0.297	0.411	1.05134e-15	2.26753e-11
Astrocytes	Arhgap26	0.383526	0.187	0.301	9.15183e-18	1.97387e-13
Astrocytes	Gsdme	0.38185	0.21	0.326	1.1104e-16	2.3949e-12
Astrocytes	Adcy8	0.380127	0.06	0.132	1.70035e-16	3.66732e-12
Astrocytes	Nedd4l	0.380024	0.129	0.246	6.43314e-22	1.3875e-17
Astrocytes	Ghr	0.379626	0.145	0.249	1.69724e-17	3.6606e-13
Astrocytes	Fars2	0.379166	0.141	0.25	3.06456e-19	6.60963e-15
Astrocytes	Garem1	0.378704	0.12	0.216	1.54638e-17	3.33522e-13
Astrocytes	Frmpd1	0.375545	0.091	0.179	8.65178e-18	1.86602e-13
Astrocytes	C130071C03Rik	0.372926	0.454	0.586	1.38811e-19	2.99389e-15
Astrocytes	Kalrn	0.369418	0.183	0.302	1.13613e-18	2.45041e-14
Astrocytes	Epha5	0.368237	0.148	0.263	1.35696e-19	2.92668e-15
Astrocytes	Akt3	0.367292	0.137	0.245	7.60602e-19	1.64047e-14
Astrocytes	Hes5	0.366718	0.201	0.305	1.4091e-14	3.03914e-10
Astrocytes	Taco1	0.366343	0.028	0.115	2.87486e-30	6.2005e-26
Astrocytes	Zfp521	0.366204	0.109	0.208	3.67987e-19	7.93675e-15
Astrocytes	Fry	0.362968	0.279	0.39	2.00714e-14	4.329e-10
Astrocytes	Auts2	0.36295	0.382	0.501	6.60546e-16	1.42466e-11
Astrocytes	Pcyt2	0.362222	0.212	0.32	1.9858e-14	4.28298e-10
Astrocytes	Slc7a11	0.360465	0.442	0.552	1.16496e-12	2.51258e-08
Astrocytes	AC165953.2	0.360271	0.063	0.162	6.44003e-26	1.38899e-21
Astrocytes	Hlcs	0.360222	0.092	0.162	2.25236e-12	4.85789e-08
Astrocytes	Prickle2	0.359788	0.083	0.167	1.41128e-17	3.04384e-13
Astrocytes	Lrig1	0.359178	0.151	0.251	3.67771e-16	7.93208e-12
Astrocytes	Col27a1	0.358639	0.057	0.123	1.30121e-14	2.80645e-10
Astrocytes	Tspan9	0.357929	0.108	0.206	7.7626e-19	1.67424e-14
Astrocytes	Pacrg	0.357927	0.112	0.206	4.20364e-17	9.06641e-13
Astrocytes	Gphn	0.356832	0.28	0.382	2.50548e-13	5.40382e-09
Astrocytes	Tulp4	0.355141	0.328	0.462	5.04303e-16	1.08768e-11
Astrocytes	Nav3	0.354431	0.062	0.132	1.91374e-15	4.12755e-11
Astrocytes	Gm48747	0.354067	0.058	0.141	2.68836e-21	5.79825e-17
Astrocytes	Brwd1	0.351831	0.148	0.262	2.01618e-19	4.34849e-15
Astrocytes	Ngef	0.351524	0.133	0.246	1.09466e-20	2.36097e-16
Astrocytes	Jam2	0.350836	0.092	0.182	6.08034e-18	1.31141e-13
Astrocytes	Slc6a11	0.350814	0.205	0.306	1.26868e-13	2.73629e-09
Astrocytes	Acat3	0.349773	0.091	0.176	2.57966e-16	5.56382e-12
Astrocytes	Adcy2	0.349757	0.121	0.232	1.2473e-20	2.69017e-16
Astrocytes	Chst11	0.349434	0.074	0.163	2.9077e-20	6.27132e-16
Astrocytes	Kcnma1	0.34724	0.116	0.209	9.44101e-17	2.03624e-12
Astrocytes	Trpm3	0.347157	0.193	0.301	6.03056e-17	1.30067e-12
Astrocytes	Sorcs2	0.347155	0.165	0.279	5.33615e-18	1.1509e-13
Astrocytes	Gabbr1	0.346646	0.351	0.478	9.19456e-15	1.98308e-10
Astrocytes	Cdh20	0.344234	0.146	0.246	8.0261e-16	1.73107e-11
Astrocytes	Dopey2	0.343109	0.147	0.252	3.88151e-17	8.37163e-13
Astrocytes	Col16a1	0.341282	0.092	0.161	3.02777e-12	6.53029e-08
Astrocytes	Gpld1	0.338582	0.162	0.255	8.91161e-14	1.92206e-09
Astrocytes	Magi2	0.336935	0.268	0.363	1.9663e-12	4.24093e-08
Astrocytes	Morc3	0.336663	0.089	0.173	4.89671e-16	1.05612e-11
Astrocytes	Abtb2	0.336542	0.054	0.132	5.90263e-20	1.27308e-15
Astrocytes	A630089N07Rik	0.336352	0.088	0.163	4.72579e-14	1.01926e-09
Astrocytes	Asap1	0.334995	0.143	0.259	8.38624e-20	1.80874e-15
Astrocytes	Grik2	0.334943	0.178	0.302	2.71946e-19	5.86534e-15
Astrocytes	Arl15	0.334553	0.061	0.133	2.31835e-16	5.00022e-12
Astrocytes	Slc5a3	0.334009	0.059	0.115	1.79505e-11	3.87156e-07
Astrocytes	Gm37240	0.332411	0.046	0.126	1.74886e-21	3.77195e-17
Astrocytes	Gm16599	0.33175	0.035	0.113	2.71255e-24	5.85043e-20
Astrocytes	Ext1	0.328952	0.097	0.192	1.43175e-18	3.08801e-14
Astrocytes	Magi1	0.328945	0.257	0.374	2.6647e-14	5.74722e-10
Astrocytes	Fbxl17	0.328334	0.11	0.213	5.3006e-20	1.14323e-15
Astrocytes	Glud1	0.327812	0.265	0.373	6.94004e-14	1.49683e-09
Astrocytes	Nf1	0.325514	0.192	0.307	8.30746e-17	1.79175e-12
Astrocytes	Ptchd4	0.325357	0.152	0.238	2.64805e-12	5.71131e-08
Astrocytes	Phf21a	0.324673	0.197	0.311	5.82293e-17	1.25589e-12
Astrocytes	Ttc3	0.324547	0.289	0.416	4.51014e-15	9.72746e-11
Astrocytes	Nfia	0.324138	0.51	0.59	9.72345e-14	2.09715e-09
Astrocytes	Gm47271	0.324073	0.06	0.136	5.97701e-18	1.28912e-13
Astrocytes	Phlpp1	0.32365	0.224	0.345	1.31326e-16	2.83243e-12
Astrocytes	Brd9	0.323539	0.303	0.452	1.31603e-18	2.83842e-14
Astrocytes	Gm26848	0.322293	0.028	0.102	5.81004e-24	1.25311e-19
Astrocytes	Bmpr1a	0.32199	0.117	0.224	1.40356e-20	3.02719e-16
Astrocytes	Fat3	0.321976	0.187	0.295	1.19841e-15	2.58473e-11
Astrocytes	Exoc4	0.32177	0.193	0.3	7.8121e-15	1.68491e-10
Astrocytes	Bmpr1b	0.321435	0.24	0.363	3.87042e-16	8.34773e-12
Astrocytes	Tspan7	0.320974	0.512	0.593	3.68192e-12	7.94117e-08
Astrocytes	Mpp6	0.320808	0.111	0.206	1.89341e-17	4.08371e-13
Astrocytes	Slc25a18	0.320697	0.107	0.211	2.38947e-20	5.1536e-16
Astrocytes	Pde1c	0.320199	0.049	0.115	6.62703e-16	1.42932e-11
Astrocytes	2610035D17Rik	0.320041	0.084	0.168	4.96948e-17	1.07182e-12
Astrocytes	Mcc	0.319964	0.171	0.272	1.01506e-14	2.18927e-10
Astrocytes	Sema6a	0.319733	0.082	0.153	4.00481e-13	8.63757e-09
Astrocytes	Gdpd2	0.319073	0.173	0.268	3.5042e-13	7.55787e-09
Astrocytes	Hdac8	0.318716	0.272	0.385	3.51171e-14	7.57406e-10
Astrocytes	Slc39a12	0.317675	0.281	0.412	9.9647e-16	2.14919e-11
Astrocytes	Slc4a4	0.316315	0.516	0.614	1.88334e-14	4.06198e-10
Astrocytes	Mpc1	0.315919	0.108	0.191	2.73491e-14	5.89865e-10
Astrocytes	Ptch1	0.315395	0.294	0.398	4.57247e-11	9.86191e-07
Astrocytes	Negr1	0.314534	0.278	0.36	1.25557e-09	2.70802e-05
Astrocytes	Znrf3	0.313275	0.141	0.235	1.21558e-14	2.62176e-10
Astrocytes	Ddhd1	0.313088	0.488	0.612	1.26984e-13	2.7388e-09
Astrocytes	Fermt2	0.31269	0.355	0.469	7.30388e-12	1.5753e-07
Astrocytes	Lrmda	0.312562	0.049	0.112	5.356e-15	1.15518e-10
Astrocytes	Gm26873	0.311852	0.03	0.103	6.07974e-23	1.31128e-18
Astrocytes	Limk2	0.311628	0.103	0.198	8.08412e-18	1.74358e-13
Astrocytes	St6galnac5	0.310638	0.185	0.284	6.86774e-14	1.48123e-09
Astrocytes	Gm26904	0.310524	0.046	0.126	9.73637e-22	2.09994e-17
Astrocytes	Nsdhl	0.310166	0.107	0.175	1.84803e-10	3.98583e-06
Astrocytes	Gm35552	0.309945	0.058	0.128	2.12862e-16	4.59102e-12
Astrocytes	Eps8	0.30883	0.195	0.305	2.57688e-15	5.55782e-11
Astrocytes	Gm44257	0.308566	0.131	0.206	1.05343e-10	2.27203e-06
Astrocytes	Shc3	0.308094	0.226	0.337	3.28521e-14	7.08553e-10
Astrocytes	Slc9a9	0.307216	0.1	0.194	5.76061e-18	1.24245e-13
Astrocytes	Acaca	0.306704	0.243	0.346	1.78659e-12	3.85333e-08
Astrocytes	Kansl1	0.305902	0.169	0.286	3.70213e-18	7.98475e-14
Astrocytes	Cryzl1	0.304615	0.095	0.163	2.95237e-11	6.36768e-07
Astrocytes	Klf12	0.30352	0.172	0.284	8.94317e-17	1.92886e-12
Astrocytes	Cyp7b1	0.302828	0.131	0.22	3.30622e-14	7.13085e-10
Astrocytes	Gm48606	0.302428	0.033	0.105	1.56548e-21	3.37642e-17
Astrocytes	Tmem55a	0.302294	0.058	0.124	1.06316e-14	2.29301e-10
Astrocytes	App	0.302232	0.186	0.299	7.04139e-16	1.51869e-11
Astrocytes	Kcnq3	0.302106	0.086	0.161	7.55438e-14	1.62933e-09
Astrocytes	Sugct	0.300489	0.06	0.138	4.69188e-18	1.01194e-13
Astrocytes	Nrcam	0.299206	0.487	0.594	5.15859e-13	1.11261e-08
Astrocytes	Appl2	0.298649	0.672	0.776	3.01896e-13	6.5113e-09
Astrocytes	Adgrb1	0.297278	0.07	0.147	3.67752e-16	7.93168e-12
Astrocytes	Pld2	0.296514	0.12	0.184	3.34942e-09	7.22402e-05
Astrocytes	Slc35f1	0.296391	0.055	0.132	4.55009e-18	9.81364e-14
Astrocytes	Wac	0.295483	0.166	0.265	3.37788e-14	7.28541e-10
Astrocytes	Drg1	0.293334	0.055	0.129	1.84593e-17	3.98129e-13
Astrocytes	Zfand3	0.293101	0.076	0.16	4.23206e-18	9.12771e-14
Astrocytes	Atp6v0b	0.293028	0.203	0.333	2.27935e-18	4.9161e-14
Astrocytes	Adcyap1r1	0.292261	0.167	0.256	1.176e-11	2.53639e-07
Astrocytes	Etv5	0.291592	0.087	0.16	3.00933e-13	6.49053e-09
Astrocytes	Thrb	0.291047	0.132	0.224	1.09751e-14	2.36711e-10
Astrocytes	Rhobtb2	0.289847	0.068	0.138	2.16438e-14	4.66814e-10
Astrocytes	Gm29683	0.289541	0.052	0.102	3.707e-10	7.99525e-06
Astrocytes	Frmd4a	0.288251	0.467	0.535	2.35184e-08	0.000507244
Astrocytes	Aqp9	0.287085	0.073	0.124	1.34857e-08	0.000290859
Astrocytes	Large1	0.286442	0.101	0.196	3.89444e-18	8.39953e-14
Astrocytes	Arl8a	0.286173	0.135	0.211	1.31678e-10	2.84003e-06
Astrocytes	Bcl2	0.283164	0.316	0.438	3.49355e-14	7.5349e-10
Astrocytes	Nim1k	0.283019	0.264	0.362	1.74002e-10	3.75288e-06
Astrocytes	Mfhas1	0.279737	0.074	0.127	3.11339e-09	6.71495e-05
Astrocytes	Gabrg3	0.276743	0.047	0.109	8.52637e-15	1.83897e-10
Astrocytes	Dner	0.276501	0.073	0.142	2.6661e-13	5.75023e-09
Astrocytes	Kansl1l	0.276012	0.164	0.247	7.22239e-11	1.55772e-06
Astrocytes	Kcnn3	0.275945	0.092	0.177	2.65306e-16	5.72212e-12
Astrocytes	Scaf4	0.275746	0.066	0.142	1.08519e-16	2.34055e-12
Astrocytes	Pde4b	0.275502	0.183	0.29	2.01794e-15	4.35229e-11
Astrocytes	Xylt1	0.27529	0.23	0.324	2.60595e-11	5.62051e-07
Astrocytes	Srgap3	0.275094	0.296	0.41	3.52016e-13	7.59227e-09
Astrocytes	Gm44686	0.274996	0.033	0.102	1.64546e-20	3.54893e-16
Astrocytes	Hexb	0.274463	0.063	0.153	2.10013e-21	4.52955e-17
Astrocytes	Tnc	0.27415	0.131	0.198	5.6967e-09	0.000122867
Astrocytes	Mfap3l	0.273967	0.119	0.207	2.24377e-14	4.83936e-10
Astrocytes	Il18	0.273733	0.23	0.339	2.19602e-13	4.73639e-09
Astrocytes	Slc8b1	0.273096	0.076	0.142	2.5825e-12	5.56994e-08
Astrocytes	Prkd1	0.272424	0.154	0.264	9.05521e-17	1.95303e-12
Astrocytes	Ptpn9	0.271623	0.058	0.13	1.04976e-16	2.26413e-12
Astrocytes	Rpl10a	0.271405	0.096	0.161	1.98281e-10	4.27653e-06
Astrocytes	Npas2	0.270935	0.068	0.139	1.00551e-14	2.16869e-10
Astrocytes	Dlg2	0.27012	0.076	0.133	5.78608e-10	1.24794e-05
Astrocytes	Csgalnact1	0.270053	0.285	0.397	1.00811e-12	2.17429e-08
Astrocytes	Bach2	0.269948	0.144	0.235	3.9848e-13	8.59441e-09
Astrocytes	Ring1	0.269369	0.173	0.247	1.00623e-08	0.000217023
Astrocytes	Ntrk3	0.268792	0.089	0.147	2.67788e-09	5.77566e-05
Astrocytes	Vwa8	0.26835	0.109	0.202	1.48693e-16	3.20702e-12
Astrocytes	Nr3c2	0.267296	0.154	0.25	7.40462e-14	1.59703e-09
Astrocytes	Gm16168	0.26722	0.058	0.122	7.1363e-14	1.53916e-09
Astrocytes	Dapk1	0.266292	0.075	0.131	7.3057e-10	1.57569e-05
Astrocytes	Rbm28	0.265893	0.145	0.229	9.99291e-12	2.15527e-07
Astrocytes	Dock4	0.265654	0.324	0.44	1.39225e-12	3.0028e-08
Astrocytes	Dip2c	0.265569	0.104	0.176	7.17782e-12	1.54811e-07
Astrocytes	Arfgef2	0.265449	0.058	0.115	1.70558e-11	3.67859e-07
Astrocytes	Ptpn4	0.264924	0.147	0.249	4.8381e-16	1.04348e-11
Astrocytes	Prkag2	0.26476	0.056	0.121	3.93892e-14	8.49546e-10
Astrocytes	Bcas3	0.264558	0.131	0.225	2.28609e-15	4.93065e-11
Astrocytes	4930517O19Rik	0.264293	0.052	0.124	2.5902e-17	5.58655e-13
Astrocytes	Sox6	0.262215	0.354	0.439	7.27273e-09	0.000156858
Astrocytes	Mir9-3hg	0.259975	0.236	0.335	2.64366e-11	5.70185e-07
Astrocytes	Smurf2	0.259775	0.066	0.125	1.48484e-11	3.20251e-07
Astrocytes	Diaph2	0.259712	0.132	0.219	2.30442e-13	4.97016e-09
Astrocytes	Zfp423	0.259426	0.037	0.107	1.57579e-19	3.39866e-15
Astrocytes	Ncoa1	0.258787	0.221	0.329	3.6349e-13	7.83976e-09
Astrocytes	Gpr19	0.258117	0.076	0.141	5.96475e-12	1.28648e-07
Astrocytes	Naaladl2	0.258064	0.067	0.145	9.50795e-17	2.05067e-12
Astrocytes	Phactr1	0.257744	0.192	0.297	7.25533e-14	1.56483e-09
Astrocytes	S100b	0.257617	0.116	0.195	3.16844e-12	6.8337e-08
Astrocytes	Prdm16	0.257134	0.174	0.278	2.37173e-14	5.11535e-10
Astrocytes	Tmem164	0.255108	0.155	0.251	6.10271e-14	1.31623e-09
Astrocytes	Fam168b	0.254452	0.1	0.179	2.61841e-13	5.64739e-09
Astrocytes	Angpt1	0.253121	0.083	0.156	1.15576e-13	2.49274e-09
Astrocytes	Ube2g1	0.25282	0.057	0.118	4.97727e-13	1.0735e-08
Astrocytes	Thoc1	0.251648	0.11	0.179	3.48379e-10	7.51384e-06
Astrocytes	Acsl3	-0.290858	0.635	0.623	3.61477e-08	0.000779633
Astrocytes	Rbm39	-0.294263	0.73	0.7	6.40129e-14	1.38063e-09
Astrocytes	Apoe	-0.312739	0.92	0.941	2.47426e-16	5.33649e-12
Astrocytes	Tcf4	-0.319315	0.895	0.872	2.0618e-23	4.44689e-19
Astrocytes	Dclk1	-0.344094	0.934	0.945	8.96275e-28	1.93309e-23
Astrocytes	Prdx6	-0.373945	0.609	0.547	2.6999e-14	5.82313e-10
Astrocytes	Zfp458	-0.417149	0.107	0.06	3.50254e-09	7.55428e-05
Astrocytes	Clu	-0.424156	0.641	0.603	1.68235e-13	3.6285e-09
Astrocytes	Rsrp1	-0.457545	0.776	0.701	3.3112e-26	7.1416e-22
Astrocytes	Gm42418	-0.481387	0.992	0.99	7.07047e-108	1.52496e-103
Astrocytes	AC160336.1	-0.496237	0.44	0.305	2.21333e-22	4.77372e-18
Astrocytes	Gm9925	-0.502559	0.38	0.295	7.00471e-14	1.51078e-09
Astrocytes	Hjurp	-0.532025	0.146	0.096	6.17187e-09	0.000133115
Astrocytes	Fam107a	-0.553732	0.266	0.203	1.69776e-10	3.66172e-06
Astrocytes	Amd2	-0.62273	0.136	0.06	1.05096e-18	2.26671e-14
Astrocytes	Clcc1	-0.627616	0.124	0.059	3.54572e-16	7.64741e-12
Astrocytes	Rmst	-0.667868	0.506	0.402	1.21015e-25	2.61006e-21
Astrocytes	Ttc12	-0.687196	0.178	0.097	5.06686e-18	1.09282e-13
Astrocytes	Utp14b	-0.733585	0.362	0.248	7.37227e-23	1.59005e-18
Astrocytes	Zfp729a	-0.741906	0.107	0.033	1.74123e-24	3.75549e-20
Astrocytes	Cst3	-0.760293	0.895	0.843	4.02935e-68	8.6905e-64
Astrocytes	Hbb-bs	-0.917673	0.115	0.014	4.62844e-47	9.98262e-43
Astrocytes	Rnf121	-1.31714	0.635	0.396	5.75436e-102	1.2411e-97
Microglia	Csgalnact2	1.70728	0.04	0.213	1.14448e-41	2.46842e-37
Microglia	Son	1.40954	0.865	0.954	4.95442e-180	1.06857e-175
Microglia	Ccr6	1.31221	0.059	0.204	5.25409e-28	1.1332e-23
Microglia	Slc1a3	1.29838	0.516	0.717	3.95654e-58	8.53348e-54
Microglia	Gm43221	1.13451	0.05	0.14	2.56918e-15	5.54122e-11
Microglia	Tmem181a	1.00588	0.074	0.173	4.67303e-15	1.00788e-10
Microglia	Dynlt1a	0.988611	0.051	0.123	2.20489e-11	4.75551e-07
Microglia	Gm12166	0.935372	0.034	0.103	1.38005e-12	2.97649e-08
Microglia	Ptgds	0.869522	0.302	0.378	6.29378e-11	1.35744e-06
Microglia	Fcrls	0.797319	0.565	0.605	1.18066e-17	2.54644e-13
Microglia	Dynlt1c	0.665439	0.057	0.118	3.93094e-08	0.000847826
Microglia	Tmsb4x	0.556368	0.633	0.641	1.77799e-10	3.83476e-06
Microglia	Hnrnpa2b1	0.370131	0.78	0.761	4.55324e-09	9.82042e-05
Microglia	Ddx5	0.306257	0.935	0.907	6.70194e-17	1.44547e-12
Microglia	Malat1	0.30224	1	1	2.98144e-20	6.43037e-16
Microglia	Nt5c2	-0.250072	0.159	0.076	7.714e-10	1.66375e-05
Microglia	Lrch3	-0.250404	0.235	0.132	1.01017e-09	2.17874e-05
Microglia	Ttc17	-0.251308	0.168	0.088	1.68384e-08	0.000363171
Microglia	Mbtd1	-0.252573	0.259	0.143	1.29695e-10	2.79725e-06
Microglia	Mef2a	-0.253393	0.822	0.671	1.42692e-08	0.000307759
Microglia	Kif3b	-0.254065	0.124	0.05	3.67024e-10	7.91598e-06
Microglia	Ppp2r5c	-0.254066	0.225	0.128	5.54665e-09	0.00011963
Microglia	Map2k5	-0.254158	0.186	0.103	3.21703e-08	0.00069385
Microglia	Wdr7	-0.254383	0.129	0.061	3.23673e-08	0.000698098
Microglia	Pum2	-0.254439	0.294	0.157	1.93125e-13	4.16532e-09
Microglia	Jmjd1c	-0.256018	0.576	0.386	3.21049e-11	6.92438e-07
Microglia	Pkig	-0.256218	0.196	0.11	1.06244e-08	0.000229147
Microglia	Plek	-0.25631	0.267	0.147	9.57977e-11	2.06616e-06
Microglia	Kcnq1ot1	-0.256627	0.376	0.24	6.41314e-09	0.000138319
Microglia	Pex14	-0.257291	0.111	0.048	1.4449e-08	0.000311636
Microglia	Dennd5a	-0.257345	0.238	0.128	4.15406e-11	8.95948e-07
Microglia	Sipa1l1	-0.257355	0.262	0.149	4.52952e-10	9.76927e-06
Microglia	Eif4g3	-0.257527	0.335	0.196	3.60028e-11	7.76509e-07
Microglia	Peli1	-0.258018	0.26	0.15	1.58794e-09	3.42488e-05
Microglia	Eif4g1	-0.258096	0.18	0.095	1.22276e-08	0.000263725
Microglia	Nfkb1	-0.258555	0.346	0.196	5.0822e-13	1.09613e-08
Microglia	Kpna4	-0.259634	0.17	0.092	3.07377e-08	0.000662952
Microglia	Abca1	-0.261208	0.405	0.257	3.29034e-11	7.0966e-07
Microglia	Clta	-0.261968	0.269	0.144	4.95072e-12	1.06777e-07
Microglia	Rtn4	-0.262069	0.35	0.217	3.75693e-10	8.10295e-06
Microglia	Gng2	-0.26348	0.235	0.138	8.69176e-09	0.000187464
Microglia	Cux1	-0.263647	0.409	0.264	2.34141e-10	5.04996e-06
Microglia	Tnfrsf21	-0.264719	0.143	0.067	3.33913e-09	7.20184e-05
Microglia	B4galt1	-0.265077	0.242	0.137	4.45564e-10	9.60992e-06
Microglia	Stambpl1	-0.265132	0.161	0.077	1.57791e-09	3.40324e-05
Microglia	Map4k3	-0.266183	0.2	0.11	3.22919e-09	6.96471e-05
Microglia	Zfr	-0.266742	0.264	0.158	3.68539e-09	7.94865e-05
Microglia	Inpp5d	-0.266958	0.695	0.555	2.13773e-08	0.000461065
Microglia	Clasp2	-0.267016	0.462	0.292	5.01863e-12	1.08242e-07
Microglia	Acss1	-0.267743	0.184	0.098	7.50462e-09	0.00016186
Microglia	Hipk2	-0.268079	0.213	0.114	3.63229e-10	7.83412e-06
Microglia	Rgs10	-0.268302	0.389	0.231	6.9085e-13	1.49003e-08
Microglia	Kmt5b	-0.268923	0.234	0.131	2.6536e-09	5.72328e-05
Microglia	Sh3glb1	-0.269242	0.312	0.19	7.35637e-10	1.58662e-05
Microglia	Myo9b	-0.269356	0.169	0.091	3.8392e-08	0.000828039
Microglia	Pnpla8	-0.269456	0.199	0.103	1.23288e-09	2.65908e-05
Microglia	Rgl1	-0.270938	0.155	0.081	3.8844e-08	0.000837787
Microglia	Tnfrsf11a	-0.271098	0.212	0.11	3.12248e-10	6.73456e-06
Microglia	Usp24	-0.271216	0.333	0.198	5.98564e-11	1.29098e-06
Microglia	Ubac2	-0.272175	0.21	0.106	3.41669e-11	7.36912e-07
Microglia	Zfp652	-0.272233	0.349	0.222	1.5633e-09	3.37174e-05
Microglia	Sgce	-0.272529	0.172	0.081	2.23327e-10	4.81671e-06
Microglia	Senp6	-0.272663	0.237	0.12	2.79005e-12	6.01759e-08
Microglia	Nbas	-0.273034	0.139	0.066	7.84125e-09	0.00016912
Microglia	Camk1	-0.273059	0.414	0.266	3.83319e-10	8.26742e-06
Microglia	Apobec3	-0.27307	0.165	0.068	1.71372e-12	3.69614e-08
Microglia	Vps13d	-0.273259	0.205	0.103	4.55595e-11	9.82627e-07
Microglia	Rap1a	-0.274515	0.272	0.144	3.07061e-12	6.6227e-08
Microglia	Fkbp15	-0.27533	0.252	0.128	1.1131e-12	2.40073e-08
Microglia	Smap2	-0.275423	0.331	0.193	1.62498e-11	3.50475e-07
Microglia	Mvb12b	-0.276979	0.257	0.139	1.31039e-11	2.82624e-07
Microglia	Desi2	-0.277281	0.128	0.059	2.25963e-08	0.000487357
Microglia	Pepd	-0.277768	0.103	0.042	1.08499e-08	0.00023401
Microglia	Zfp236	-0.278111	0.138	0.061	8.82265e-10	1.90287e-05
Microglia	Bin2	-0.278342	0.343	0.208	1.4806e-10	3.19336e-06
Microglia	Usp32	-0.279045	0.142	0.066	1.87278e-09	4.03922e-05
Microglia	Zmym4	-0.279084	0.187	0.094	5.42367e-10	1.16978e-05
Microglia	Ncoa2	-0.2817	0.264	0.145	1.92331e-11	4.1482e-07
Microglia	Itpr2	-0.28268	0.399	0.244	3.32279e-12	7.1666e-08
Microglia	Abl2	-0.283093	0.158	0.079	9.07627e-09	0.000195757
Microglia	Dcaf5	-0.28413	0.126	0.056	3.86885e-09	8.34434e-05
Microglia	Arhgef11	-0.284476	0.169	0.079	9.91969e-11	2.13948e-06
Microglia	Ralgapa1	-0.284764	0.219	0.12	1.38894e-09	2.99567e-05
Microglia	Cap1	-0.285292	0.18	0.09	7.34632e-10	1.58445e-05
Microglia	Bmpr2	-0.285749	0.23	0.128	9.30248e-10	2.00636e-05
Microglia	Cul1	-0.285769	0.257	0.137	2.48198e-12	5.35314e-08
Microglia	Sipa1l2	-0.285895	0.248	0.139	3.78664e-10	8.16702e-06
Microglia	Ubr5	-0.28653	0.267	0.143	3.71991e-12	8.0231e-08
Microglia	Stau1	-0.286829	0.189	0.101	5.42463e-09	0.000116998
Microglia	Zfp532	-0.286964	0.207	0.104	3.68422e-11	7.94613e-07
Microglia	Rffl	-0.287906	0.237	0.131	3.04662e-10	6.57096e-06
Microglia	Exoc6b	-0.288114	0.274	0.163	1.35068e-09	2.91315e-05
Microglia	Zfp950	-0.288469	0.29	0.171	1.80828e-09	3.9001e-05
Microglia	Ncf1	-0.289339	0.311	0.184	3.29735e-10	7.11173e-06
Microglia	Ssbp2	-0.290531	0.324	0.183	2.68396e-12	5.78877e-08
Microglia	Lyn	-0.291009	0.561	0.381	2.35585e-10	5.08109e-06
Microglia	Cask	-0.29105	0.225	0.123	4.17118e-10	8.99641e-06
Microglia	Pign	-0.291921	0.189	0.096	4.94291e-10	1.06609e-05
Microglia	Mxi1	-0.292343	0.106	0.042	3.86628e-09	8.33879e-05
Microglia	Tbck	-0.292558	0.212	0.103	3.22455e-12	6.95471e-08
Microglia	Atxn7l1	-0.29368	0.238	0.13	1.44082e-10	3.10757e-06
Microglia	P2rx7	-0.293829	0.276	0.164	2.58617e-09	5.57784e-05
Microglia	Kmt2c	-0.29406	0.404	0.25	2.39127e-12	5.1575e-08
Microglia	Tspan14	-0.296358	0.222	0.13	6.66007e-09	0.000143644
Microglia	Atp6v0a1	-0.296499	0.327	0.199	1.61973e-10	3.49343e-06
Microglia	Peli2	-0.297067	0.212	0.123	1.09392e-08	0.000235937
Microglia	Myo1f	-0.297176	0.385	0.226	5.97385e-13	1.28844e-08
Microglia	Tmem104	-0.297297	0.11	0.04	1.68924e-10	3.64335e-06
Microglia	Wnk1	-0.297839	0.653	0.463	1.7668e-11	3.81063e-07
Microglia	Bcl2l1	-0.298159	0.197	0.102	5.03806e-10	1.08661e-05
Microglia	Ahcyl2	-0.298526	0.136	0.066	3.37475e-08	0.000727867
Microglia	Setd2	-0.298833	0.332	0.197	5.33435e-12	1.15051e-07
Microglia	Sfswap	-0.299151	0.224	0.118	8.63358e-11	1.86209e-06
Microglia	Tcf12	-0.300221	0.314	0.177	3.50598e-12	7.56169e-08
Microglia	Eef2k	-0.300694	0.303	0.176	5.80132e-11	1.25123e-06
Microglia	Arhgef12	-0.301319	0.189	0.098	1.69955e-09	3.6656e-05
Microglia	Apc	-0.302225	0.289	0.169	9.60779e-11	2.07221e-06
Microglia	Fmn1	-0.302266	0.2	0.09	4.06388e-13	8.76498e-09
Microglia	Wdfy3	-0.302576	0.349	0.203	3.47697e-12	7.49913e-08
Microglia	Dnajc5	-0.302627	0.185	0.103	3.97234e-08	0.000856755
Microglia	Tcf20	-0.302753	0.222	0.113	2.22652e-11	4.80215e-07
Microglia	Ino80	-0.304281	0.133	0.063	2.6274e-08	0.000566678
Microglia	Ppp3ca	-0.305282	0.51	0.33	6.69615e-13	1.44423e-08
Microglia	Lpp	-0.3053	0.216	0.117	5.00702e-10	1.07991e-05
Microglia	Creb1	-0.305534	0.259	0.136	2.68511e-12	5.79124e-08
Microglia	Faf1	-0.305849	0.152	0.078	3.25156e-08	0.000701296
Microglia	Rassf2	-0.306059	0.26	0.144	5.78516e-11	1.24774e-06
Microglia	Arid2	-0.306585	0.241	0.13	8.42393e-11	1.81687e-06
Microglia	Brd4	-0.30661	0.246	0.127	3.92984e-12	8.47588e-08
Microglia	Rabgap1l	-0.306743	0.145	0.068	2.02241e-09	4.36193e-05
Microglia	Lrrc4	-0.306854	0.12	0.051	3.20079e-09	6.90347e-05
Microglia	Cfh	-0.307443	0.527	0.356	9.79691e-12	2.113e-07
Microglia	Spire1	-0.3076	0.26	0.139	4.24262e-12	9.15047e-08
Microglia	Ebf3	-0.307651	0.142	0.057	2.18612e-11	4.71503e-07
Microglia	Fyco1	-0.307676	0.204	0.116	1.43355e-08	0.000309188
Microglia	Map3k14	-0.30796	0.206	0.106	1.00909e-10	2.17641e-06
Microglia	Nckap1l	-0.307987	0.413	0.253	2.857e-12	6.16198e-08
Microglia	Smurf2	-0.30906	0.204	0.11	4.84284e-10	1.0445e-05
Microglia	Agps	-0.309551	0.288	0.17	7.43389e-11	1.60334e-06
Microglia	Lpcat2	-0.312005	0.507	0.343	7.07725e-12	1.52642e-07
Microglia	Litaf	-0.31202	0.119	0.05	2.22529e-09	4.79951e-05
Microglia	Med12l	-0.31258	0.292	0.157	3.2778e-13	7.06956e-09
Microglia	Baz2b	-0.313579	0.383	0.217	9.36806e-15	2.0205e-10
Microglia	Rin3	-0.315622	0.17	0.081	1.74894e-10	3.77212e-06
Microglia	Ctif	-0.31563	0.101	0.039	4.63199e-09	9.99027e-05
Microglia	Tmem135	-0.315789	0.33	0.18	3.39933e-14	7.33168e-10
Microglia	Glrp1	-0.316386	0.117	0.05	1.37333e-08	0.0002962
Microglia	Pdcd4	-0.31643	0.104	0.044	3.07837e-08	0.000663942
Microglia	Ptk2b	-0.316525	0.21	0.11	1.7385e-10	3.74959e-06
Microglia	Dock11	-0.317314	0.23	0.125	2.97856e-10	6.42417e-06
Microglia	Chd7	-0.317438	0.355	0.204	1.76181e-13	3.79987e-09
Microglia	Parn	-0.31797	0.12	0.053	1.48151e-08	0.000319532
Microglia	Elavl1	-0.318594	0.145	0.071	2.02685e-08	0.000437152
Microglia	Tnrc18	-0.319323	0.219	0.118	5.1413e-10	1.10888e-05
Microglia	Gm21992	-0.320131	0.117	0.046	2.606e-10	5.62061e-06
Microglia	Srgap2	-0.321123	0.847	0.735	4.94046e-14	1.06556e-09
Microglia	Rnf216	-0.321786	0.347	0.198	1.93167e-13	4.16622e-09
Microglia	Fggy	-0.323534	0.113	0.05	1.97681e-08	0.000426359
Microglia	Fgfr2	-0.323715	0.203	0.11	1.60583e-09	3.46346e-05
Microglia	Irak2	-0.323981	0.302	0.156	7.23968e-15	1.56145e-10
Microglia	Pbx1	-0.324131	0.212	0.108	3.43117e-11	7.40035e-07
Microglia	Btaf1	-0.324357	0.181	0.09	4.94432e-10	1.06639e-05
Microglia	St3gal6	-0.324575	0.462	0.285	2.44719e-13	5.27809e-09
Microglia	Nlk	-0.32555	0.226	0.112	1.28334e-12	2.7679e-08
Microglia	Erbin	-0.325588	0.318	0.178	3.96652e-13	8.55498e-09
Microglia	Lcor	-0.325733	0.229	0.12	1.20411e-11	2.59704e-07
Microglia	Arsb	-0.326635	0.328	0.194	3.35484e-11	7.23573e-07
Microglia	AU040320	-0.327639	0.136	0.062	2.31759e-09	4.99858e-05
Microglia	Rbm47	-0.327711	0.214	0.116	4.7984e-10	1.03492e-05
Microglia	Rab40c	-0.329141	0.138	0.056	2.77017e-11	5.9747e-07
Microglia	Sncaip	-0.330916	0.161	0.077	6.85765e-10	1.47906e-05
Microglia	Mtmr3	-0.331367	0.232	0.117	2.00002e-12	4.31364e-08
Microglia	Rbm26	-0.331899	0.384	0.229	4.42278e-13	9.53905e-09
Microglia	Ankrd11	-0.332322	0.423	0.251	4.68745e-14	1.01099e-09
Microglia	Wdr33	-0.332615	0.244	0.119	9.18576e-14	1.98118e-09
Microglia	Rb1	-0.333558	0.189	0.096	2.11249e-10	4.55622e-06
Microglia	Cacnb2	-0.334142	0.264	0.16	1.18354e-08	0.000255265
Microglia	Rab39	-0.334324	0.154	0.068	6.90766e-11	1.48984e-06
Microglia	Med13l	-0.334347	0.318	0.177	2.08067e-13	4.48759e-09
Microglia	C1qc	-0.334599	0.433	0.278	1.90122e-11	4.10054e-07
Microglia	4930444A19Rik	-0.334877	0.106	0.045	2.10309e-08	0.000453595
Microglia	Strn3	-0.335167	0.28	0.156	1.50369e-11	3.24317e-07
Microglia	Eri3	-0.335193	0.168	0.083	8.06123e-10	1.73865e-05
Microglia	Map4k5	-0.335811	0.165	0.079	3.16643e-10	6.82936e-06
Microglia	Copg2	-0.33611	0.139	0.067	9.82225e-09	0.000211846
Microglia	Aak1	-0.336192	0.19	0.095	1.95202e-10	4.21011e-06
Microglia	Btrc	-0.337026	0.149	0.076	3.04426e-08	0.000656586
Microglia	Bin1	-0.337173	0.489	0.321	3.0082e-12	6.4881e-08
Microglia	Atf6	-0.337584	0.203	0.1	6.02437e-12	1.29934e-07
Microglia	Whrn	-0.337951	0.322	0.18	5.81166e-13	1.25346e-08
Microglia	Scarb2	-0.338252	0.205	0.098	4.29759e-12	9.26905e-08
Microglia	Fam117b	-0.339872	0.216	0.109	1.79988e-11	3.88199e-07
Microglia	Cxxc5	-0.341422	0.198	0.098	4.23678e-11	9.13789e-07
Microglia	Zfp609	-0.342477	0.152	0.07	4.76697e-10	1.02814e-05
Microglia	Cradd	-0.343454	0.165	0.077	2.17955e-10	4.70086e-06
Microglia	Creb3l2	-0.343501	0.129	0.049	1.14663e-11	2.47305e-07
Microglia	Elp4	-0.343739	0.144	0.063	1.2662e-10	2.73094e-06
Microglia	Cerk	-0.343762	0.252	0.138	2.49105e-11	5.3727e-07
Microglia	Klhl6	-0.34451	0.168	0.076	2.33203e-11	5.02972e-07
Microglia	Xpo7	-0.34508	0.18	0.081	2.74911e-12	5.92929e-08
Microglia	Trio	-0.345212	0.345	0.2	9.43625e-13	2.03521e-08
Microglia	Tmcc1	-0.345729	0.307	0.18	2.61149e-11	5.63245e-07
Microglia	Mllt10	-0.346036	0.309	0.172	1.93224e-13	4.16747e-09
Microglia	Nos1ap	-0.346337	0.24	0.135	1.99555e-10	4.30401e-06
Microglia	Psme4	-0.346562	0.24	0.113	1.71633e-14	3.70177e-10
Microglia	Dym	-0.347452	0.139	0.058	5.82733e-11	1.25684e-06
Microglia	Dgkd	-0.347724	0.32	0.171	1.38945e-14	2.99676e-10
Microglia	Lncpint	-0.347986	0.247	0.137	4.96744e-11	1.07138e-06
Microglia	Tbc1d16	-0.349161	0.264	0.134	1.34677e-13	2.90472e-09
Microglia	Ubxn7	-0.349606	0.123	0.056	1.8034e-08	0.000388958
Microglia	Ywhaz	-0.350008	0.194	0.1	3.661e-10	7.89604e-06
Microglia	Znrf2	-0.35048	0.192	0.089	3.27806e-12	7.07012e-08
Microglia	Cep112	-0.350662	0.104	0.042	8.34e-09	0.000179877
Microglia	Zfp710	-0.35068	0.43	0.26	4.70633e-13	1.01506e-08
Microglia	Cd86	-0.351037	0.275	0.137	1.01108e-14	2.1807e-10
Microglia	Epsti1	-0.351898	0.113	0.049	1.2026e-08	0.000259376
Microglia	2010111I01Rik	-0.352228	0.201	0.095	1.78014e-12	3.83941e-08
Microglia	AW554918	-0.352442	0.191	0.099	4.99477e-10	1.07727e-05
Microglia	Abcd2	-0.353804	0.177	0.083	4.28248e-11	9.23645e-07
Microglia	Phf21a	-0.355068	0.278	0.152	8.07863e-12	1.7424e-07
Microglia	Dagla	-0.356611	0.101	0.036	2.51423e-10	5.42269e-06
Microglia	Gspt1	-0.356909	0.208	0.098	7.67976e-13	1.65637e-08
Microglia	Mon2	-0.357625	0.239	0.123	1.75019e-12	3.77481e-08
Microglia	Sil1	-0.357861	0.101	0.042	1.9304e-08	0.000416349
Microglia	Ehd4	-0.358213	0.212	0.107	1.38632e-11	2.99001e-07
Microglia	Cyth1	-0.359119	0.114	0.05	1.11061e-08	0.000239536
Microglia	Il7r	-0.359123	0.158	0.075	8.49613e-10	1.83244e-05
Microglia	Rab2a	-0.359674	0.181	0.082	5.13445e-12	1.1074e-07
Microglia	Rnf169	-0.360998	0.222	0.111	3.29507e-12	7.10681e-08
Microglia	Nipbl	-0.361074	0.424	0.252	6.46894e-15	1.39522e-10
Microglia	Ncoa1	-0.362001	0.128	0.058	5.62561e-09	0.000121333
Microglia	4732471J01Rik	-0.362598	0.139	0.055	7.86866e-12	1.69711e-07
Microglia	Fnip1	-0.362802	0.27	0.139	2.58099e-14	5.56667e-10
Microglia	Rassf3	-0.36375	0.129	0.053	1.89304e-10	4.0829e-06
Microglia	Arhgap25	-0.364475	0.313	0.167	2.42033e-14	5.22017e-10
Microglia	Cd34	-0.365032	0.139	0.061	7.95061e-10	1.71479e-05
Microglia	Retreg1	-0.365704	0.272	0.145	2.12579e-12	4.5849e-08
Microglia	Ap3b1	-0.367294	0.26	0.134	1.08282e-13	2.33543e-09
Microglia	Cdk8	-0.367642	0.31	0.17	8.46741e-14	1.82625e-09
Microglia	Adap2	-0.368188	0.513	0.304	1.00588e-17	2.16948e-13
Microglia	Trp53cor1	-0.368531	0.104	0.041	2.89764e-09	6.24964e-05
Microglia	Hs2st1	-0.368955	0.141	0.063	9.78459e-10	2.11034e-05
Microglia	Stx8	-0.370425	0.15	0.064	1.84446e-11	3.97812e-07
Microglia	Gbf1	-0.370711	0.189	0.094	7.97216e-11	1.71944e-06
Microglia	Xrcc4	-0.370774	0.164	0.079	6.04236e-10	1.30322e-05
Microglia	Eefsec	-0.371405	0.133	0.055	1.16325e-10	2.50889e-06
Microglia	Wasf2	-0.373076	0.414	0.237	1.83587e-15	3.9596e-11
Microglia	Kpna3	-0.374157	0.169	0.078	3.92483e-11	8.46508e-07
Microglia	Elmsan1	-0.374452	0.121	0.054	7.37226e-09	0.000159005
Microglia	Rab8b	-0.374539	0.231	0.112	1.62413e-13	3.50291e-09
Microglia	Tbl1xr1	-0.375585	0.285	0.146	1.90459e-14	4.10783e-10
Microglia	Diaph2	-0.375591	0.382	0.242	7.61181e-11	1.64172e-06
Microglia	Lgmn	-0.377688	0.497	0.336	3.81225e-13	8.22226e-09
Microglia	Rere	-0.380016	0.358	0.205	6.27619e-14	1.35365e-09
Microglia	Grb2	-0.380434	0.219	0.105	4.13716e-13	8.92303e-09
Microglia	Ppp4r1	-0.380501	0.149	0.065	4.89192e-11	1.05509e-06
Microglia	Mbd5	-0.381121	0.273	0.136	3.30985e-15	7.13869e-11
Microglia	Acvr1	-0.381188	0.187	0.094	5.92031e-11	1.27689e-06
Microglia	Lrp5	-0.381468	0.149	0.061	5.85467e-12	1.26273e-07
Microglia	Atg16l2	-0.381626	0.154	0.059	2.66571e-13	5.74941e-09
Microglia	Gm42418	-0.381644	0.995	0.982	6.22694e-17	1.34303e-12
Microglia	Ptpro	-0.382493	0.187	0.081	1.57689e-13	3.40104e-09
Microglia	Strbp	-0.383741	0.173	0.091	7.81422e-09	0.000168537
Microglia	Mark2	-0.385817	0.225	0.116	8.4736e-12	1.82759e-07
Microglia	St3gal3	-0.38677	0.162	0.076	7.9143e-11	1.70696e-06
Microglia	Il6st	-0.387847	0.257	0.126	2.17926e-14	4.70022e-10
Microglia	Vrk2	-0.388581	0.269	0.135	1.79914e-14	3.88038e-10
Microglia	Kat6a	-0.389719	0.262	0.127	7.96577e-15	1.71806e-10
Microglia	Asxl1	-0.394389	0.202	0.096	8.37933e-13	1.80725e-08
Microglia	Tln2	-0.394434	0.203	0.096	5.93832e-13	1.28078e-08
Microglia	Mapk14	-0.394648	0.285	0.148	4.15686e-14	8.96551e-10
Microglia	Rps6kc1	-0.395432	0.149	0.05	2.6979e-15	5.81883e-11
Microglia	Cdk19	-0.395659	0.247	0.124	1.1478e-13	2.47557e-09
Microglia	2210408I21Rik	-0.395731	0.103	0.04	3.2956e-09	7.10796e-05
Microglia	Osbpl9	-0.395792	0.229	0.122	5.95667e-11	1.28473e-06
Microglia	Nr6a1os	-0.395811	0.156	0.065	4.30317e-12	9.28108e-08
Microglia	Galnt7	-0.395967	0.175	0.092	3.66066e-09	7.89532e-05
Microglia	Fam172a	-0.397521	0.369	0.207	4.68542e-15	1.01055e-10
Microglia	Ptpra	-0.398	0.319	0.164	2.44201e-16	5.26692e-12
Microglia	3110082I17Rik	-0.399378	0.12	0.051	2.5552e-09	5.51105e-05
Microglia	Soga1	-0.400041	0.302	0.167	3.27923e-13	7.07265e-09
Microglia	Gm5086	-0.400261	0.243	0.127	2.77196e-12	5.97856e-08
Microglia	Zfhx3	-0.401204	0.628	0.475	6.29774e-13	1.3583e-08
Microglia	Pard3b	-0.402856	0.174	0.089	8.54421e-10	1.84282e-05
Microglia	Tbl1x	-0.406279	0.238	0.118	4.91242e-13	1.05951e-08
Microglia	Vav1	-0.407178	0.23	0.125	7.3539e-11	1.58609e-06
Microglia	Rtn3	-0.407293	0.286	0.144	3.72403e-15	8.032e-11
Microglia	Prkce	-0.408712	0.181	0.071	7.06474e-15	1.52372e-10
Microglia	Gm20275	-0.409438	0.109	0.039	8.546e-11	1.8432e-06
Microglia	Map3k3	-0.40948	0.246	0.126	3.78779e-13	8.1695e-09
Microglia	Lgals9	-0.409551	0.177	0.083	3.39833e-11	7.32952e-07
Microglia	Rasal2	-0.409714	0.217	0.106	2.09342e-12	4.51509e-08
Microglia	Mkl1	-0.409804	0.171	0.079	1.71084e-11	3.68994e-07
Microglia	Pik3cg	-0.409911	0.264	0.144	8.92527e-12	1.925e-07
Microglia	Eml6	-0.410843	0.178	0.077	7.92149e-13	1.70851e-08
Microglia	Sppl3	-0.412315	0.229	0.113	3.27564e-13	7.06491e-09
Microglia	Rin2	-0.412434	0.308	0.159	1.06607e-15	2.2993e-11
Microglia	Crebbp	-0.412486	0.352	0.196	1.25655e-14	2.71013e-10
Microglia	Rnf130	-0.412608	0.183	0.083	4.09058e-12	8.82255e-08
Microglia	Bicra	-0.413259	0.169	0.07	4.52934e-13	9.76889e-09
Microglia	Dip2b	-0.4152	0.429	0.238	8.03571e-17	1.73314e-12
Microglia	Ikzf1	-0.415573	0.423	0.257	1.77502e-14	3.82837e-10
Microglia	Snd1	-0.417966	0.229	0.108	1.92382e-14	4.1493e-10
Microglia	Pias1	-0.419313	0.302	0.158	4.687e-15	1.01089e-10
Microglia	Pik3ca	-0.4217	0.182	0.09	1.44495e-10	3.11646e-06
Microglia	Basp1	-0.422386	0.334	0.172	5.5041e-17	1.18712e-12
Microglia	Babam2	-0.423109	0.243	0.115	5.59949e-15	1.2077e-10
Microglia	Ust	-0.423732	0.122	0.056	1.36168e-08	0.000293686
Microglia	Sh3pxd2a	-0.423795	0.244	0.123	1.42096e-13	3.06472e-09
Microglia	Fnip2	-0.423946	0.165	0.07	1.29325e-12	2.78929e-08
Microglia	Supt3	-0.427661	0.199	0.09	9.42547e-14	2.03289e-09
Microglia	Tmem164	-0.429816	0.22	0.11	1.75555e-12	3.78637e-08
Microglia	Eps15	-0.430686	0.193	0.101	7.25881e-10	1.56558e-05
Microglia	Pon3	-0.431311	0.142	0.045	2.45772e-15	5.30082e-11
Microglia	Sik3	-0.432652	0.174	0.083	3.76938e-11	8.1298e-07
Microglia	Abcc3	-0.434523	0.196	0.081	2.32246e-15	5.00908e-11
Microglia	Cmip	-0.438005	0.254	0.126	3.5321e-14	7.61803e-10
Microglia	Stat3	-0.438022	0.2	0.086	1.3549e-14	2.92225e-10
Microglia	Nek7	-0.439604	0.341	0.176	3.09839e-17	6.68261e-13
Microglia	Dennd4a	-0.439668	0.552	0.375	2.8895e-14	6.23208e-10
Microglia	Pmepa1	-0.442299	0.435	0.256	3.67094e-16	7.91749e-12
Microglia	Rasgrp3	-0.443007	0.378	0.209	1.35028e-16	2.91229e-12
Microglia	Vapa	-0.44435	0.152	0.063	2.22682e-12	4.80281e-08
Microglia	Msi2	-0.444583	0.273	0.133	8.51201e-16	1.83587e-11
Microglia	2610020C07Rik	-0.451857	0.129	0.038	1.61315e-15	3.47924e-11
Microglia	Foxo3	-0.452413	0.184	0.082	3.51363e-13	7.57819e-09
Microglia	Rap1gds1	-0.452948	0.442	0.25	5.63486e-18	1.21533e-13
Microglia	Rps6ka3	-0.453426	0.196	0.101	6.38941e-11	1.37807e-06
Microglia	Ski	-0.454063	0.377	0.2	1.41647e-18	3.05505e-14
Microglia	Peak1	-0.454934	0.235	0.106	9.45414e-16	2.03907e-11
Microglia	Specc1	-0.456135	0.401	0.228	1.3789e-16	2.97401e-12
Microglia	Plxdc1	-0.457389	0.172	0.075	8.87961e-13	1.91515e-08
Microglia	Ppm1e	-0.459124	0.104	0.032	4.28662e-12	9.24538e-08
Microglia	Dennd1a	-0.459904	0.322	0.158	1.52161e-18	3.2818e-14
Microglia	Vps13b	-0.460094	0.298	0.142	3.07933e-18	6.6415e-14
Microglia	Extl3	-0.460319	0.256	0.133	1.98811e-13	4.28795e-09
Microglia	Mir142hg	-0.460602	0.243	0.117	2.12397e-14	4.58098e-10
Microglia	Nrf1	-0.460894	0.203	0.096	5.46193e-13	1.17803e-08
Microglia	Hdac8	-0.462913	0.176	0.07	7.91574e-15	1.70727e-10
Microglia	Fars2	-0.463724	0.199	0.083	1.07427e-15	2.31698e-11
Microglia	4930517O19Rik	-0.464197	0.113	0.033	9.24753e-14	1.99451e-09
Microglia	Myh9	-0.464207	0.326	0.163	4.8451e-18	1.04499e-13
Microglia	Dlc1	-0.466862	0.172	0.064	2.53703e-15	5.47186e-11
Microglia	Gm48678	-0.469014	0.114	0.032	2.57418e-14	5.552e-10
Microglia	Rhoq	-0.471758	0.225	0.101	8.18756e-16	1.76589e-11
Microglia	Apbb2	-0.47217	0.235	0.118	4.39606e-13	9.48142e-09
Microglia	Thada	-0.472402	0.194	0.089	1.79428e-13	3.86991e-09
Microglia	Dip2c	-0.473045	0.186	0.093	5.75815e-11	1.24192e-06
Microglia	Tns3	-0.473655	0.364	0.185	4.87668e-19	1.0518e-14
Microglia	Sh3kbp1	-0.473849	0.34	0.17	2.87525e-18	6.20133e-14
Microglia	Rasa3	-0.475658	0.197	0.081	1.42002e-15	3.06271e-11
Microglia	Rapgef1	-0.475769	0.251	0.123	2.67761e-15	5.77507e-11
Microglia	Prkch	-0.478072	0.126	0.044	1.40706e-12	3.03474e-08
Microglia	Rab3ip	-0.478139	0.142	0.05	6.71698e-14	1.44872e-09
Microglia	Zeb1	-0.47835	0.289	0.143	4.82439e-16	1.04052e-11
Microglia	Slc7a7	-0.480279	0.2	0.091	9.27061e-14	1.99948e-09
Microglia	Stab1	-0.486876	0.385	0.268	4.26007e-08	0.000918813
Microglia	St3gal2	-0.487685	0.136	0.044	1.45559e-14	3.13942e-10
Microglia	Clcc1	-0.489196	0.124	0.053	1.44115e-09	3.10828e-05
Microglia	2510009E07Rik	-0.489408	0.153	0.048	5.84271e-17	1.26015e-12
Microglia	Bcas3	-0.490278	0.209	0.1	3.67013e-13	7.91574e-09
Microglia	Cables1	-0.49038	0.209	0.095	3.56392e-14	7.68665e-10
Microglia	Spata5	-0.492358	0.156	0.071	7.65546e-11	1.65113e-06
Microglia	Mylip	-0.492893	0.377	0.2	2.68873e-18	5.79905e-14
Microglia	Rtn4rl1	-0.494898	0.202	0.094	1.30646e-13	2.81777e-09
Microglia	Foxn3	-0.496441	0.487	0.309	4.23999e-16	9.14482e-12
Microglia	Fkbp5	-0.497296	0.139	0.057	2.50343e-11	5.3994e-07
Microglia	Fbxw11	-0.497427	0.164	0.058	6.54499e-16	1.41162e-11
Microglia	Prkcb	-0.498851	0.314	0.152	1.34713e-18	2.90548e-14
Microglia	Man1a	-0.499533	0.281	0.142	1.59548e-15	3.44113e-11
Microglia	Etv5	-0.499663	0.193	0.09	6.9775e-13	1.50491e-08
Microglia	Ulk2	-0.50045	0.299	0.147	2.10446e-17	4.53891e-13
Microglia	Lrrc8d	-0.500471	0.191	0.086	1.37961e-13	2.97553e-09
Microglia	Nr3c2	-0.500514	0.133	0.043	2.35062e-14	5.06982e-10
Microglia	Cacna1d	-0.501217	0.225	0.113	1.17934e-12	2.54359e-08
Microglia	Man1c1	-0.502152	0.222	0.094	1.0724e-16	2.31295e-12
Microglia	Kansl1	-0.50313	0.366	0.197	2.21965e-17	4.78734e-13
Microglia	Azin1	-0.505434	0.149	0.057	3.33752e-13	7.19836e-09
Microglia	E2f3	-0.506439	0.192	0.079	1.78733e-15	3.85491e-11
Microglia	Arhgap22	-0.508086	0.318	0.161	1.25716e-17	2.71144e-13
Microglia	Snx13	-0.509121	0.274	0.131	8.04506e-17	1.73516e-12
Microglia	Mctp1	-0.509202	0.293	0.173	2.05626e-10	4.43494e-06
Microglia	Vti1a	-0.509245	0.3	0.154	2.51032e-16	5.41426e-12
Microglia	Arhgap24	-0.513133	0.123	0.047	2.80659e-11	6.05325e-07
Microglia	Rapgef5	-0.513385	0.469	0.264	2.8635e-19	6.176e-15
Microglia	Numb	-0.514745	0.583	0.385	3.78861e-18	8.17128e-14
Microglia	Rhobtb1	-0.516856	0.205	0.089	4.15465e-15	8.96074e-11
Microglia	Gm37240	-0.519045	0.167	0.069	9.37224e-14	2.0214e-09
Microglia	Foxp1	-0.519457	0.327	0.175	1.18873e-15	2.56386e-11
Microglia	Zbtb20	-0.523754	0.536	0.322	1.49032e-21	3.21433e-17
Microglia	Spi1	-0.524944	0.226	0.108	2.73245e-14	5.89334e-10
Microglia	Atxn1	-0.527495	0.257	0.133	5.75364e-14	1.24094e-09
Microglia	Oxct1	-0.528046	0.231	0.101	3.79766e-17	8.1908e-13
Microglia	Trappc9	-0.528489	0.208	0.09	1.38939e-15	2.99664e-11
Microglia	Cers6	-0.528505	0.127	0.046	1.33089e-12	2.87046e-08
Microglia	Fmnl2	-0.531154	0.184	0.07	2.46989e-16	5.32707e-12
Microglia	Exoc4	-0.534179	0.373	0.203	1.41607e-17	3.05417e-13
Microglia	Map3k5	-0.534424	0.236	0.116	1.43728e-14	3.09993e-10
Microglia	Dock4	-0.538309	0.631	0.477	1.51879e-16	3.27572e-12
Microglia	Camk1d	-0.540855	0.388	0.199	2.98561e-20	6.43936e-16
Microglia	Wdfy4	-0.545452	0.234	0.109	1.08665e-15	2.34369e-11
Microglia	Gnaq	-0.546822	0.416	0.23	2.46193e-19	5.30989e-15
Microglia	Elmo1	-0.549969	0.698	0.529	7.54836e-21	1.62803e-16
Microglia	Fry	-0.550501	0.316	0.15	5.34837e-20	1.15354e-15
Microglia	Galnt10	-0.550514	0.119	0.027	1.78985e-17	3.86036e-13
Microglia	Rnf150	-0.555938	0.104	0.022	3.87398e-16	8.35539e-12
Microglia	Bcl2	-0.559424	0.106	0.043	9.26776e-09	0.000199887
Microglia	Zdhhc14	-0.560433	0.26	0.128	5.4875e-16	1.18354e-11
Microglia	Plcg2	-0.560982	0.315	0.151	8.36212e-20	1.80354e-15
Microglia	Hpgd	-0.562134	0.174	0.049	4.57437e-21	9.86599e-17
Microglia	Mgat5	-0.56352	0.339	0.162	8.31913e-21	1.79427e-16
Microglia	Itgb5	-0.566903	0.427	0.245	3.44136e-18	7.42232e-14
Microglia	Wdr41	-0.572421	0.113	0.045	8.19096e-10	1.76663e-05
Microglia	Lims1	-0.574908	0.312	0.15	5.82195e-19	1.25568e-14
Microglia	Tbc1d9	-0.576591	0.266	0.106	1.10241e-21	2.37768e-17
Microglia	Magi1	-0.578981	0.226	0.099	1.42836e-16	3.08069e-12
Microglia	Nuak1	-0.57994	0.283	0.134	4.81286e-18	1.03804e-13
Microglia	Snx29	-0.58068	0.529	0.319	1.33693e-21	2.88348e-17
Microglia	Stk10	-0.581136	0.194	0.077	7.48273e-17	1.61387e-12
Microglia	Phlpp1	-0.581635	0.148	0.066	9.88984e-11	2.13304e-06
Microglia	Myo18b	-0.581825	0.162	0.037	3.64903e-23	7.87022e-19
Microglia	Pik3ap1	-0.585529	0.275	0.134	6.12434e-17	1.3209e-12
Microglia	Bbs9	-0.586523	0.292	0.136	2.81623e-19	6.07405e-15
Microglia	Bank1	-0.589603	0.289	0.147	1.07874e-15	2.32662e-11
Microglia	Large1	-0.591837	0.359	0.186	2.43382e-19	5.24927e-15
Microglia	Arhgap39	-0.594391	0.34	0.157	1.17523e-22	2.53473e-18
Microglia	Adamts16	-0.597861	0.133	0.034	8.28724e-18	1.78739e-13
Microglia	St6gal1	-0.600285	0.174	0.067	1.25996e-15	2.71748e-11
Microglia	Gm26542	-0.609316	0.189	0.076	2.52435e-16	5.44451e-12
Microglia	Hivep3	-0.61052	0.35	0.18	1.64233e-19	3.54218e-15
Microglia	Fli1	-0.613341	0.438	0.24	1.54804e-20	3.3388e-16
Microglia	Tgfbr2	-0.622087	0.343	0.171	1.13007e-20	2.43734e-16
Microglia	Pde3b	-0.623738	0.525	0.326	1.28031e-20	2.76137e-16
Microglia	Ppm1l	-0.627724	0.155	0.059	3.63777e-14	7.84593e-10
Microglia	Pvt1	-0.628675	0.219	0.083	9.653e-20	2.08196e-15
Microglia	Ube2h	-0.633204	0.259	0.111	6.73902e-20	1.45347e-15
Microglia	Ttc28	-0.633664	0.391	0.2	1.3745e-22	2.96452e-18
Microglia	Tbc1d22a	-0.634391	0.222	0.091	1.56841e-18	3.38276e-14
Microglia	Gna12	-0.636965	0.28	0.124	1.55112e-20	3.34546e-16
Microglia	Nfia	-0.637909	0.386	0.21	3.02201e-19	6.51787e-15
Microglia	Nr6a1	-0.638458	0.196	0.07	1.49074e-19	3.21523e-15
Microglia	Rnf121	-0.638685	0.25	0.1	7.1574e-20	1.54371e-15
Microglia	0610040J01Rik	-0.643128	0.248	0.112	1.05814e-17	2.28219e-13
Microglia	Ambra1	-0.647417	0.23	0.094	2.67465e-19	5.76869e-15
Microglia	Slc24a3	-0.648039	0.241	0.117	4.02902e-15	8.68979e-11
Microglia	Immp2l	-0.652431	0.201	0.09	3.6736e-14	7.92323e-10
Microglia	Traf3	-0.652603	0.151	0.039	2.8318e-20	6.10763e-16
Microglia	Dock8	-0.654358	0.448	0.233	6.62678e-25	1.42926e-20
Microglia	Pid1	-0.655624	0.374	0.208	7.73916e-17	1.66918e-12
Microglia	Tifa	-0.657537	0.156	0.044	2.63151e-19	5.67565e-15
Microglia	Mlph	-0.661111	0.174	0.049	2.43472e-21	5.2512e-17
Microglia	Nbea	-0.662112	0.254	0.087	6.14613e-25	1.3256e-20
Microglia	Ppm1h	-0.662906	0.379	0.19	2.21393e-22	4.77501e-18
Microglia	Ptprj	-0.666307	0.396	0.191	6.9909e-24	1.5078e-19
Microglia	Smyd3	-0.66962	0.264	0.116	2.01498e-19	4.34592e-15
Microglia	Lysmd4	-0.674003	0.254	0.108	3.15973e-20	6.8149e-16
Microglia	P3h2	-0.67639	0.274	0.111	1.01287e-22	2.18455e-18
Microglia	Gab1	-0.683988	0.228	0.083	1.42139e-21	3.06565e-17
Microglia	Lhfpl2	-0.685864	0.363	0.163	8.02803e-26	1.73149e-21
Microglia	Zfand3	-0.687681	0.273	0.118	1.57651e-21	3.40022e-17
Microglia	Plxdc2	-0.693168	0.645	0.516	1.55112e-19	3.34547e-15
Microglia	Apba1	-0.696273	0.24	0.091	9.29721e-22	2.00522e-17
Microglia	Etv6	-0.696523	0.341	0.163	1.39767e-22	3.01449e-18
Microglia	Agmo	-0.69778	0.302	0.138	4.13276e-21	8.91354e-17
Microglia	Amotl1	-0.70387	0.136	0.034	1.45913e-18	3.14705e-14
Microglia	Tspan18	-0.710412	0.178	0.043	2.04175e-25	4.40365e-21
Microglia	Adgre1	-0.720065	0.209	0.081	8.88502e-19	1.91632e-14
Microglia	Btbd9	-0.722753	0.329	0.162	5.75202e-21	1.24059e-16
Microglia	Rab31	-0.725459	0.243	0.092	7.42547e-23	1.60153e-18
Microglia	Snx24	-0.728822	0.218	0.088	1.15771e-18	2.49695e-14
Microglia	Gtdc1	-0.729045	0.26	0.112	5.97503e-20	1.2887e-15
Microglia	Akt3	-0.734732	0.185	0.055	3.79857e-22	8.19277e-18
Microglia	Tbc1d5	-0.740663	0.471	0.243	5.0313e-29	1.08515e-24
Microglia	Pitpnc1	-0.742164	0.358	0.171	1.0826e-23	2.33494e-19
Microglia	Pip4k2a	-0.742942	0.439	0.224	4.36457e-26	9.41351e-22
Microglia	Kcnk13	-0.743277	0.248	0.108	8.20762e-20	1.77022e-15
Microglia	Park2	-0.745121	0.299	0.142	6.68683e-20	1.44222e-15
Microglia	Oxr1	-0.747305	0.31	0.134	4.43214e-24	9.55923e-20
Microglia	Ext1	-0.756326	0.22	0.093	1.27874e-17	2.75798e-13
Microglia	Rnf180	-0.756966	0.299	0.131	6.30712e-23	1.36032e-18
Microglia	Nf1	-0.757634	0.351	0.159	5.35067e-26	1.15403e-21
Microglia	Slc9a9	-0.75764	0.41	0.216	1.75369e-20	3.78236e-16
Microglia	Pde4d	-0.759719	0.184	0.063	6.19563e-19	1.33627e-14
Microglia	Mertk	-0.769013	0.698	0.456	2.89221e-33	6.23791e-29
Microglia	Nav2	-0.774007	0.637	0.488	2.35519e-23	5.07968e-19
Microglia	Plxna4	-0.77404	0.331	0.158	1.25066e-22	2.69743e-18
Microglia	Plcl2	-0.776656	0.395	0.191	5.53648e-26	1.19411e-21
Microglia	Maml3	-0.781988	0.501	0.3	4.69515e-24	1.01265e-19
Microglia	Cdh23	-0.78456	0.316	0.142	1.18614e-23	2.55826e-19
Microglia	Arl15	-0.794373	0.299	0.13	3.70655e-23	7.99429e-19
Microglia	Maml2	-0.797672	0.312	0.137	1.42792e-23	3.07975e-19
Microglia	Tanc2	-0.798993	0.653	0.453	7.44351e-31	1.60542e-26
Microglia	Nlrp1b	-0.801484	0.235	0.071	1.1158e-27	2.40656e-23
Microglia	Nav3	-0.801596	0.612	0.418	3.78583e-26	8.16528e-22
Microglia	Wwox	-0.813145	0.261	0.111	1.07054e-20	2.30894e-16
Microglia	Gm20388	-0.815662	0.352	0.149	6.49912e-29	1.40173e-24
Microglia	Coro2a	-0.815678	0.147	0.012	1.29569e-32	2.79454e-28
Microglia	Inpp4b	-0.825923	0.461	0.224	2.24228e-31	4.83615e-27
Microglia	Fbxl17	-0.828362	0.323	0.137	1.12561e-26	2.42771e-22
Microglia	8030442B05Rik	-0.835547	0.286	0.114	1.25673e-25	2.71052e-21
Microglia	Mitf	-0.838166	0.336	0.133	8.96133e-31	1.93278e-26
Microglia	Rreb1	-0.853311	0.459	0.222	3.60419e-32	7.77353e-28
Microglia	Bach2	-0.856601	0.29	0.121	7.05038e-24	1.52063e-19
Microglia	Ccnd3	-0.879517	0.411	0.183	9.74011e-33	2.10075e-28
Microglia	Gm35188	-0.88863	0.286	0.12	4.12815e-24	8.9036e-20
Microglia	Gab2	-0.900574	0.381	0.161	7.49042e-32	1.61553e-27
Microglia	Sfi1	-0.923688	0.29	0.113	1.26786e-26	2.73453e-22
Microglia	Hdac9	-0.924163	0.299	0.136	3.51912e-22	7.59003e-18
Microglia	Lrch1	-0.931933	0.398	0.174	4.01964e-33	8.66957e-29
Microglia	Fgf13	-0.940098	0.246	0.099	4.70881e-21	1.0156e-16
Microglia	Chn2	-1.00898	0.359	0.146	4.53419e-33	9.77934e-29
Microglia	Ubash3b	-1.01757	0.472	0.23	3.12821e-36	6.74692e-32
Microglia	Fat3	-1.02679	0.238	0.062	1.37883e-32	2.97386e-28
Microglia	4933406I18Rik	-1.04746	0.415	0.206	1.69433e-30	3.65434e-26
Microglia	Klf12	-1.05883	0.291	0.103	2.14725e-31	4.63118e-27
Microglia	Rbpj	-1.0602	0.153	0.072	3.02525e-10	6.52485e-06
Microglia	Sdk1	-1.10851	0.197	0.037	3.2794e-33	7.07301e-29
Microglia	Cadm1	-1.10999	0.403	0.159	7.15156e-40	1.54245e-35
Microglia	Pcdh9	-1.15918	0.242	0.106	1.63816e-17	3.53319e-13
Microglia	Fhit	-1.16401	0.235	0.076	1.80053e-27	3.88338e-23
Microglia	Slc8a1	-1.2308	0.43	0.222	1.91225e-33	4.12434e-29
Microglia	Nkain2	-1.2488	0.118	0.041	3.1592e-12	6.81375e-08
Microglia	Ldlrad4	-1.26066	0.42	0.197	5.51215e-36	1.18886e-31
Microglia	Kcnma1	-1.29474	0.299	0.087	2.60887e-40	5.62681e-36
Microglia	Ptprm	-1.32292	0.257	0.05	1.46302e-44	3.15544e-40
Microglia	Plcl1	-1.46924	0.391	0.162	4.69196e-41	1.01196e-36
Microglia	Nhs	-1.57789	0.168	0.003	1.93441e-45	4.17213e-41
Microglia	Lrmda	-1.63389	0.353	0.121	1.6727e-43	3.60768e-39
Microglia	Csmd3	-1.86721	0.746	0.443	8.00316e-100	1.72612e-95
Oligodendrocytes	Adam11	1.99583	0.009	0.244	0	0
Oligodendrocytes	Sav1	1.46114	0.068	0.242	2.24006e-246	4.83136e-242
Oligodendrocytes	Son	1.39416	0.85	0.947	0	0
Oligodendrocytes	Gm28322	1.13579	0.051	0.125	1.38653e-72	2.99046e-68
Oligodendrocytes	Neat1	1.08928	0.838	0.914	0	0
Oligodendrocytes	Fcho1	1.05096	0.077	0.306	0	0
Oligodendrocytes	Slc5a3	1.03255	0.11	0.203	2.3871e-76	5.14849e-72
Oligodendrocytes	Tmem181a	0.968529	0.084	0.206	1.73718e-127	3.74675e-123
Oligodendrocytes	Dscaml1	0.914977	0.136	0.252	9.04049e-102	1.94985e-97
Oligodendrocytes	Tjap1	0.911802	0.298	0.339	1.91303e-34	4.12602e-30
Oligodendrocytes	Csgalnact2	0.896204	0.063	0.144	1.2143e-77	2.61901e-73
Oligodendrocytes	Ppp1cc	0.729891	0.161	0.335	1.43623e-146	3.09766e-142
Oligodendrocytes	Hspa4l	0.726741	0.115	0.155	3.49654e-19	7.54135e-15
Oligodendrocytes	Brd9	0.705757	0.314	0.355	1.85758e-27	4.00644e-23
Oligodendrocytes	P4ha1	0.679037	0.13	0.159	1.88385e-12	4.06309e-08
Oligodendrocytes	Hnrnpa2b1	0.678118	0.73	0.742	3.43577e-118	7.41028e-114
Oligodendrocytes	Cryab	0.658693	0.253	0.272	6.25284e-11	1.34861e-06
Oligodendrocytes	Cdh2	0.654468	0.752	0.623	1.93016e-34	4.16297e-30
Oligodendrocytes	Abca8a	0.652153	0.202	0.27	2.29034e-37	4.93981e-33
Oligodendrocytes	Hsp90ab1	0.637708	0.307	0.334	5.25402e-18	1.13319e-13
Oligodendrocytes	Apoe	0.633518	0.409	0.479	2.67126e-51	5.76136e-47
Oligodendrocytes	Ahsa2	0.600928	0.118	0.148	2.08727e-12	4.50183e-08
Oligodendrocytes	Mat2a	0.59467	0.392	0.424	4.9343e-27	1.06423e-22
Oligodendrocytes	Dusp11	0.591577	0.565	0.585	1.38363e-56	2.98422e-52
Oligodendrocytes	Stmn1	0.576234	0.422	0.419	7.05e-15	1.52054e-10
Oligodendrocytes	Fbl	0.566731	0.16	0.198	1.16179e-15	2.50576e-11
Oligodendrocytes	Hspa8	0.564617	0.196	0.221	6.84751e-10	1.47687e-05
Oligodendrocytes	Hsph1	0.563902	0.096	0.12	1.26766e-09	2.73409e-05
Oligodendrocytes	Atp6v0b	0.559837	0.233	0.311	2.0432e-40	4.40676e-36
Oligodendrocytes	Prr18	0.531587	0.155	0.191	3.3615e-14	7.25009e-10
Oligodendrocytes	Scd2	0.530916	0.646	0.623	1.57323e-31	3.39314e-27
Oligodendrocytes	Paxbp1	0.519261	0.137	0.199	2.53135e-32	5.45962e-28
Oligodendrocytes	Hnrnpdl	0.502072	0.519	0.53	1.99309e-31	4.2987e-27
Oligodendrocytes	Snrpf	0.497782	0.08	0.144	1.67119e-40	3.60443e-36
Oligodendrocytes	E130102H24Rik	0.495585	0.215	0.236	1.95042e-08	0.000420666
Oligodendrocytes	Gjc3	0.493078	0.888	0.868	9.78087e-112	2.10954e-107
Oligodendrocytes	Ddx5	0.487713	0.795	0.779	1.37725e-100	2.97046e-96
Oligodendrocytes	B230307C23Rik	0.48361	0.1	0.128	6.21522e-11	1.3405e-06
Oligodendrocytes	Ptgds	0.471874	0.713	0.765	3.14603e-76	6.78536e-72
Oligodendrocytes	Ifi27	0.460819	0.111	0.145	2.56763e-13	5.53785e-09
Oligodendrocytes	Dusp15	0.458306	0.177	0.207	9.50937e-11	2.05098e-06
Oligodendrocytes	Adam15	0.450245	0.086	0.122	5.62878e-16	1.21402e-11
Oligodendrocytes	Taf1d	0.446154	0.207	0.23	2.67069e-08	0.000576014
Oligodendrocytes	Fth1	0.434822	0.608	0.585	8.0207e-18	1.72991e-13
Oligodendrocytes	Car2	0.433621	0.802	0.759	4.41887e-42	9.53061e-38
Oligodendrocytes	Srsf5	0.432608	0.546	0.521	1.50841e-14	3.25333e-10
Oligodendrocytes	Josd2	0.43257	0.469	0.465	2.74653e-14	5.92371e-10
Oligodendrocytes	Zcchc7	0.430152	0.701	0.654	1.67266e-24	3.6076e-20
Oligodendrocytes	Atxn2l	0.427233	0.183	0.216	4.37778e-11	9.44199e-07
Oligodendrocytes	Slc1a2	0.427216	0.109	0.147	1.42787e-14	3.07963e-10
Oligodendrocytes	Slc38a2	0.419803	0.648	0.634	2.94341e-33	6.34835e-29
Oligodendrocytes	Prpf4b	0.410967	0.552	0.53	4.98507e-13	1.07518e-08
Oligodendrocytes	Mbd6	0.409068	0.097	0.123	1.57917e-09	3.40595e-05
Oligodendrocytes	Aatk	0.405798	0.787	0.732	9.52145e-62	2.05359e-57
Oligodendrocytes	Fabp5	0.396452	0.075	0.104	1.87193e-12	4.03737e-08
Oligodendrocytes	Zfp771	0.386591	0.079	0.103	1.24382e-09	2.68267e-05
Oligodendrocytes	Plp1	0.382678	0.998	0.995	4.53973e-165	9.79128e-161
Oligodendrocytes	Pnisr	0.375581	0.715	0.652	1.55647e-18	3.35699e-14
Oligodendrocytes	Mag	0.350699	0.858	0.792	9.76364e-64	2.10582e-59
Oligodendrocytes	Phldb1	0.325735	0.813	0.741	9.22448e-37	1.98954e-32
Oligodendrocytes	Elmod2	0.299157	0.098	0.137	2.58233e-15	5.56957e-11
Oligodendrocytes	Hexb	0.299135	0.089	0.128	2.19446e-17	4.73301e-13
Oligodendrocytes	Atp5a1	0.291596	0.078	0.117	2.4044e-17	5.18581e-13
Oligodendrocytes	Mbp	0.275586	0.996	0.989	3.19799e-88	6.89742e-84
Oligodendrocytes	Snrnp70	0.274076	0.768	0.682	6.16718e-11	1.33014e-06
Oligodendrocytes	Malat1	0.267851	1	1	8.17656e-65	1.76352e-60
Oligodendrocytes	Rsrp1	0.265489	0.799	0.715	3.05441e-38	6.58775e-34
Oligodendrocytes	Pim3	0.254379	0.095	0.121	2.76167e-08	0.000595636
Oligodendrocytes	Cd9	0.254116	0.248	0.187	1.33643e-10	2.88241e-06
Oligodendrocytes	Gm47283	-0.250059	0.161	0.101	5.76984e-28	1.24444e-23
Oligodendrocytes	Ube4b	-0.250182	0.194	0.104	1.19472e-52	2.57678e-48
Oligodendrocytes	Prickle1	-0.250509	0.255	0.167	4.74695e-37	1.02382e-32
Oligodendrocytes	Nckap1	-0.250621	0.314	0.188	1.2321e-63	2.6574e-59
Oligodendrocytes	Ahcyl2	-0.250693	0.147	0.084	6.46638e-34	1.39467e-29
Oligodendrocytes	Adam19	-0.250695	0.173	0.095	1.12256e-43	2.42115e-39
Oligodendrocytes	Tmcc3	-0.250805	0.494	0.322	1.58927e-68	3.42774e-64
Oligodendrocytes	Sfi1	-0.251043	0.145	0.078	3.77451e-37	8.14087e-33
Oligodendrocytes	AU040320	-0.25115	0.186	0.104	1.01133e-45	2.18124e-41
Oligodendrocytes	Mapre2	-0.25115	0.341	0.21	4.66354e-58	1.00583e-53
Oligodendrocytes	AC110241.2	-0.251426	0.348	0.216	1.60447e-56	3.46052e-52
Oligodendrocytes	Adamts2	-0.251511	0.216	0.12	6.62712e-53	1.42934e-48
Oligodendrocytes	Kmt2c	-0.252191	0.493	0.312	1.82869e-79	3.94412e-75
Oligodendrocytes	Rngtt	-0.252309	0.228	0.128	9.05442e-54	1.95286e-49
Oligodendrocytes	Oxct1	-0.252755	0.197	0.107	7.89555e-51	1.70291e-46
Oligodendrocytes	Glod4	-0.253011	0.15	0.073	3.41028e-49	7.35529e-45
Oligodendrocytes	Arhgap21	-0.253334	0.348	0.213	1.88168e-63	4.05842e-59
Oligodendrocytes	Gm42418	-0.253638	0.996	0.984	3.16528e-99	6.82687e-95
Oligodendrocytes	Ptk2	-0.254059	0.663	0.463	1.02028e-67	2.20055e-63
Oligodendrocytes	Cdh10	-0.254321	0.589	0.439	2.72924e-47	5.88642e-43
Oligodendrocytes	Gpr137c	-0.254764	0.191	0.116	6.85473e-36	1.47843e-31
Oligodendrocytes	Tmod1	-0.255029	0.328	0.181	2.25725e-79	4.86844e-75
Oligodendrocytes	Hepacam	-0.255463	0.364	0.22	4.87659e-71	1.05178e-66
Oligodendrocytes	Ube2g1	-0.255851	0.217	0.133	3.57983e-41	7.72098e-37
Oligodendrocytes	Gm44686	-0.255869	0.162	0.095	3.35756e-35	7.24159e-31
Oligodendrocytes	Adcy9	-0.256049	0.137	0.075	6.89508e-36	1.48713e-31
Oligodendrocytes	Adamtsl1	-0.256311	0.386	0.239	2.50758e-67	5.40835e-63
Oligodendrocytes	Rabep1	-0.256385	0.21	0.12	1.22818e-48	2.64894e-44
Oligodendrocytes	Sgip1	-0.25651	0.231	0.137	5.66066e-48	1.22089e-43
Oligodendrocytes	Slc10a7	-0.256942	0.153	0.076	1.06719e-48	2.30171e-44
Oligodendrocytes	Mast3	-0.257033	0.633	0.429	4.64754e-79	1.00238e-74
Oligodendrocytes	Rffl	-0.257118	0.479	0.316	9.37123e-67	2.02119e-62
Oligodendrocytes	4932443L11Rik	-0.257311	0.115	0.054	1.20881e-40	2.60717e-36
Oligodendrocytes	Adk	-0.257315	0.277	0.165	1.11245e-55	2.39933e-51
Oligodendrocytes	Micu2	-0.257515	0.14	0.075	2.47628e-37	5.34085e-33
Oligodendrocytes	Thada	-0.257814	0.171	0.092	2.33552e-45	5.03726e-41
Oligodendrocytes	Sesn1	-0.258238	0.17	0.091	5.27044e-46	1.13673e-41
Oligodendrocytes	Mpp5	-0.258691	0.282	0.164	7.23432e-62	1.5603e-57
Oligodendrocytes	Tbl1x	-0.259051	0.233	0.135	2.36512e-50	5.1011e-46
Oligodendrocytes	Atp8a1	-0.259357	0.701	0.514	5.96107e-62	1.28568e-57
Oligodendrocytes	Elovl6	-0.259843	0.2	0.114	2.84488e-46	6.13583e-42
Oligodendrocytes	Vgll4	-0.259945	0.316	0.183	1.90752e-69	4.11414e-65
Oligodendrocytes	Jakmip2	-0.259964	0.177	0.1	8.19692e-42	1.76791e-37
Oligodendrocytes	AC161607.1	-0.260241	0.134	0.074	4.11987e-34	8.88574e-30
Oligodendrocytes	Ptn	-0.260336	0.569	0.379	2.24172e-76	4.83493e-72
Oligodendrocytes	Stag1	-0.260393	0.424	0.266	5.09508e-73	1.09891e-68
Oligodendrocytes	Fam228b	-0.260605	0.184	0.083	1.01167e-67	2.18196e-63
Oligodendrocytes	Prima1	-0.261316	0.286	0.164	1.57511e-65	3.3972e-61
Oligodendrocytes	Ubr3	-0.261321	0.345	0.202	1.28143e-73	2.7638e-69
Oligodendrocytes	Cntln	-0.261338	0.151	0.085	9.13513e-37	1.97027e-32
Oligodendrocytes	Kctd3	-0.261448	0.347	0.206	2.20565e-67	4.75716e-63
Oligodendrocytes	Ttyh2	-0.26162	0.504	0.327	1.15718e-79	2.49581e-75
Oligodendrocytes	Rab10	-0.261622	0.277	0.161	7.26495e-61	1.5669e-56
Oligodendrocytes	Dcaf5	-0.261873	0.132	0.064	1.95629e-44	4.21932e-40
Oligodendrocytes	Ubac2	-0.262501	0.17	0.09	6.39016e-47	1.37823e-42
Oligodendrocytes	Nrf1	-0.262551	0.193	0.101	2.96614e-54	6.39737e-50
Oligodendrocytes	Anks1b	-0.262686	0.589	0.421	6.88318e-52	1.48456e-47
Oligodendrocytes	Mkl1	-0.262855	0.119	0.058	1.7568e-40	3.78906e-36
Oligodendrocytes	Rbks	-0.263602	0.104	0.046	3.59489e-41	7.75346e-37
Oligodendrocytes	E130307A14Rik	-0.263618	0.205	0.117	3.78897e-48	8.17205e-44
Oligodendrocytes	Nr3c1	-0.26379	0.307	0.184	1.49273e-62	3.21951e-58
Oligodendrocytes	Gm13905	-0.264205	0.114	0.044	5.5484e-56	1.19668e-51
Oligodendrocytes	Depdc5	-0.264287	0.213	0.117	1.19375e-54	2.57469e-50
Oligodendrocytes	Ldb3	-0.264308	0.125	0.058	2.36456e-44	5.09989e-40
Oligodendrocytes	Taf3	-0.264419	0.146	0.069	4.57994e-50	9.87801e-46
Oligodendrocytes	Itfg1	-0.264467	0.252	0.153	3.40915e-49	7.35284e-45
Oligodendrocytes	Srsf7	-0.264793	0.342	0.2	4.16e-72	8.97229e-68
Oligodendrocytes	Gm21992	-0.264818	0.104	0.04	1.70123e-50	3.6692e-46
Oligodendrocytes	Ralgapa1	-0.264882	0.393	0.242	1.85868e-71	4.0088e-67
Oligodendrocytes	Rab40c	-0.265508	0.32	0.184	7.00941e-73	1.51179e-68
Oligodendrocytes	Eml1	-0.266204	0.373	0.244	5.18581e-53	1.11848e-48
Oligodendrocytes	Hjurp	-0.26779	0.119	0.063	5.15689e-32	1.11224e-27
Oligodendrocytes	Adam22	-0.268108	0.331	0.2	2.74391e-65	5.91807e-61
Oligodendrocytes	Psd3	-0.268367	0.437	0.281	2.02826e-68	4.37454e-64
Oligodendrocytes	Wdfy3	-0.268449	0.319	0.189	1.41121e-66	3.04369e-62
Oligodendrocytes	Gm47271	-0.268651	0.167	0.104	1.06664e-29	2.30052e-25
Oligodendrocytes	Foxn3	-0.269433	0.624	0.431	1.76025e-75	3.79652e-71
Oligodendrocytes	Sp4	-0.270807	0.182	0.089	1.57162e-58	3.38967e-54
Oligodendrocytes	Wdr33	-0.271471	0.293	0.172	4.79471e-63	1.03412e-58
Oligodendrocytes	Samd4	-0.271548	0.373	0.237	4.99974e-61	1.07834e-56
Oligodendrocytes	Ptpn4	-0.271787	0.152	0.081	3.66995e-42	7.91534e-38
Oligodendrocytes	Cobl	-0.271805	0.228	0.136	8.569e-47	1.84816e-42
Oligodendrocytes	Cdk5rap2	-0.272133	0.269	0.148	2.96095e-68	6.38617e-64
Oligodendrocytes	Slk	-0.272198	0.299	0.17	8.36378e-70	1.8039e-65
Oligodendrocytes	Sema4d	-0.272419	0.235	0.135	6.98222e-54	1.50593e-49
Oligodendrocytes	Atxn10	-0.272463	0.181	0.093	1.92447e-54	4.1507e-50
Oligodendrocytes	Wdfy2	-0.27279	0.272	0.15	3.11887e-70	6.72678e-66
Oligodendrocytes	Hacd2	-0.27332	0.161	0.081	3.61592e-51	7.79882e-47
Oligodendrocytes	Hivep3	-0.273462	0.178	0.09	8.42046e-55	1.81612e-50
Oligodendrocytes	Insr	-0.2735	0.306	0.179	4.26642e-67	9.20182e-63
Oligodendrocytes	9030624J02Rik	-0.273764	0.271	0.145	3.68669e-75	7.95146e-71
Oligodendrocytes	Pld1	-0.274307	0.257	0.139	1.34688e-67	2.90496e-63
Oligodendrocytes	Frmd4b	-0.275017	0.731	0.541	1.37293e-68	2.96113e-64
Oligodendrocytes	Rb1	-0.275282	0.263	0.16	1.67378e-51	3.61001e-47
Oligodendrocytes	Eps15	-0.275351	0.444	0.273	4.13653e-81	8.92167e-77
Oligodendrocytes	Hs3st1	-0.275687	0.214	0.119	1.71867e-52	3.70683e-48
Oligodendrocytes	Gng7	-0.276248	0.18	0.087	4.94674e-60	1.06691e-55
Oligodendrocytes	Ppm1h	-0.27753	0.134	0.067	5.98008e-43	1.28978e-38
Oligodendrocytes	Ttc28	-0.277595	0.112	0.051	1.70102e-41	3.66875e-37
Oligodendrocytes	Specc1	-0.278526	0.388	0.243	1.6805e-66	3.6245e-62
Oligodendrocytes	Atad2b	-0.278857	0.355	0.207	2.60039e-78	5.60853e-74
Oligodendrocytes	Fam120c	-0.27929	0.149	0.077	6.61667e-44	1.42708e-39
Oligodendrocytes	Desi1	-0.279324	0.327	0.195	2.50705e-68	5.4072e-64
Oligodendrocytes	R3hcc1l	-0.280252	0.181	0.09	8.66546e-58	1.86897e-53
Oligodendrocytes	Btrc	-0.28058	0.223	0.118	2.70232e-63	5.82836e-59
Oligodendrocytes	Prkcq	-0.280782	0.287	0.173	1.80098e-56	3.88435e-52
Oligodendrocytes	Sik2	-0.281389	0.263	0.153	8.86049e-59	1.91103e-54
Oligodendrocytes	Bbs9	-0.281539	0.222	0.122	1.83288e-56	3.95317e-52
Oligodendrocytes	Rab30	-0.281915	0.138	0.064	6.11485e-50	1.31885e-45
Oligodendrocytes	Nfasc	-0.282352	0.66	0.457	1.2471e-76	2.68974e-72
Oligodendrocytes	Bche	-0.282491	0.147	0.076	1.8919e-44	4.08046e-40
Oligodendrocytes	Cacna2d1	-0.282907	0.132	0.075	1.74824e-30	3.7706e-26
Oligodendrocytes	Tjp2	-0.283301	0.299	0.168	1.10528e-74	2.38386e-70
Oligodendrocytes	Dip2b	-0.284175	0.503	0.312	3.7268e-83	8.03796e-79
Oligodendrocytes	Fgf12	-0.28421	0.113	0.068	7.07877e-23	1.52675e-18
Oligodendrocytes	Prkca	-0.284942	0.391	0.249	1.92263e-64	4.14672e-60
Oligodendrocytes	Rcan2	-0.285149	0.164	0.095	7.07633e-37	1.52622e-32
Oligodendrocytes	AW554918	-0.285753	0.222	0.124	8.45228e-55	1.82299e-50
Oligodendrocytes	Ubash3b	-0.285849	0.288	0.174	8.29408e-57	1.78887e-52
Oligodendrocytes	Kazn	-0.286598	0.352	0.205	1.04864e-75	2.26171e-71
Oligodendrocytes	Slmap	-0.286713	0.181	0.089	5.43601e-59	1.17244e-54
Oligodendrocytes	Ctnnd2	-0.287015	0.195	0.123	3.36054e-33	7.248e-29
Oligodendrocytes	Foxp1	-0.287156	0.281	0.172	7.25301e-53	1.56433e-48
Oligodendrocytes	Zfp438	-0.287208	0.117	0.051	1.2861e-47	2.77386e-43
Oligodendrocytes	Cadps	-0.287635	0.157	0.087	1.54277e-38	3.32745e-34
Oligodendrocytes	Apc	-0.287689	0.518	0.333	3.27107e-81	7.05505e-77
Oligodendrocytes	Xpo7	-0.287886	0.226	0.114	1.24599e-69	2.68736e-65
Oligodendrocytes	Parm1	-0.288118	0.191	0.104	6.12196e-50	1.32038e-45
Oligodendrocytes	1700111E14Rik	-0.288401	0.119	0.055	1.57824e-43	3.40394e-39
Oligodendrocytes	Gm28375	-0.288858	0.131	0.067	4.94665e-40	1.06689e-35
Oligodendrocytes	Gm37459	-0.288872	0.23	0.133	3.45789e-51	7.45797e-47
Oligodendrocytes	Srgap3	-0.28966	0.292	0.166	2.20476e-69	4.75523e-65
Oligodendrocytes	Arnt2	-0.290164	0.283	0.163	7.74506e-67	1.67046e-62
Oligodendrocytes	2210408I21Rik	-0.290336	0.2	0.12	2.47351e-40	5.33487e-36
Oligodendrocytes	Mad1l1	-0.290489	0.171	0.09	2.76526e-48	5.96411e-44
Oligodendrocytes	Nxpe4	-0.290638	0.109	0.046	2.02416e-46	4.36572e-42
Oligodendrocytes	Phactr1	-0.29089	0.643	0.463	3.8722e-69	8.35155e-65
Oligodendrocytes	Camta1	-0.291058	0.268	0.152	1.1704e-65	2.52432e-61
Oligodendrocytes	Pam	-0.291089	0.263	0.162	5.62308e-48	1.21279e-43
Oligodendrocytes	Stox2	-0.291124	0.431	0.263	1.46837e-84	3.16697e-80
Oligodendrocytes	Ppp1r12b	-0.291254	0.211	0.116	1.82921e-54	3.94523e-50
Oligodendrocytes	Tspan14	-0.291957	0.254	0.148	6.45258e-57	1.39169e-52
Oligodendrocytes	Tesk2	-0.292012	0.187	0.094	1.47614e-58	3.18375e-54
Oligodendrocytes	Otulin	-0.292155	0.166	0.092	5.79858e-43	1.25064e-38
Oligodendrocytes	Tbc1d16	-0.292263	0.135	0.057	3.16855e-57	6.83392e-53
Oligodendrocytes	Lrrc1	-0.292685	0.231	0.12	6.78919e-68	1.46429e-63
Oligodendrocytes	Trappc9	-0.292759	0.167	0.088	3.69915e-47	7.97833e-43
Oligodendrocytes	Bicra	-0.293875	0.176	0.091	7.24615e-52	1.56285e-47
Oligodendrocytes	Gnai1	-0.294018	0.315	0.19	2.19422e-63	4.73249e-59
Oligodendrocytes	Atg10	-0.294651	0.124	0.06	3.4571e-42	7.45627e-38
Oligodendrocytes	Ldlrad4	-0.295726	0.209	0.107	4.70334e-63	1.01442e-58
Oligodendrocytes	Gng12	-0.2971	0.177	0.094	5.50566e-50	1.18746e-45
Oligodendrocytes	Mast4	-0.298254	0.903	0.803	2.89595e-81	6.24598e-77
Oligodendrocytes	Fgfr2	-0.298271	0.683	0.501	9.92832e-67	2.14134e-62
Oligodendrocytes	Large1	-0.298316	0.17	0.096	5.70103e-41	1.2296e-36
Oligodendrocytes	Bach2	-0.298622	0.189	0.114	3.26782e-38	7.04803e-34
Oligodendrocytes	Asb3	-0.298797	0.194	0.101	3.89725e-57	8.40559e-53
Oligodendrocytes	Asxl1	-0.299873	0.168	0.082	8.47065e-56	1.82695e-51
Oligodendrocytes	Snd1	-0.30041	0.201	0.109	4.37145e-54	9.42834e-50
Oligodendrocytes	Osbpl1a	-0.300867	0.435	0.265	9.92285e-86	2.14016e-81
Oligodendrocytes	Nipbl	-0.301176	0.455	0.27	1.68546e-95	3.6352e-91
Oligodendrocytes	Ston2	-0.30184	0.19	0.097	1.11711e-57	2.40939e-53
Oligodendrocytes	Cdk8	-0.301912	0.36	0.222	1.66055e-66	3.58148e-62
Oligodendrocytes	Mkl2	-0.302152	0.173	0.085	6.27779e-57	1.35399e-52
Oligodendrocytes	Pcca	-0.302353	0.226	0.124	1.84126e-59	3.97122e-55
Oligodendrocytes	Nr3c2	-0.302462	0.152	0.078	2.35078e-46	5.07017e-42
Oligodendrocytes	Gm11659	-0.302893	0.174	0.092	2.88699e-49	6.22666e-45
Oligodendrocytes	Wdr7	-0.303908	0.192	0.105	6.34488e-51	1.36846e-46
Oligodendrocytes	Gm37240	-0.304354	0.162	0.094	8.64065e-36	1.86361e-31
Oligodendrocytes	Pak7	-0.304394	0.712	0.558	1.09313e-55	2.35766e-51
Oligodendrocytes	Zfyve9	-0.304642	0.188	0.102	1.42984e-50	3.08388e-46
Oligodendrocytes	Apbb2	-0.304663	0.524	0.341	2.66422e-80	5.7462e-76
Oligodendrocytes	Fto	-0.30553	0.421	0.247	2.36368e-92	5.09798e-88
Oligodendrocytes	Flnb	-0.30577	0.282	0.154	6.48164e-74	1.39796e-69
Oligodendrocytes	Mllt10	-0.305874	0.368	0.217	6.07399e-79	1.31004e-74
Oligodendrocytes	Map2k5	-0.306075	0.251	0.138	3.14812e-67	6.78985e-63
Oligodendrocytes	Gpd2	-0.307078	0.165	0.08	1.73834e-55	3.74926e-51
Oligodendrocytes	Amph	-0.30756	0.409	0.258	1.87936e-70	4.0534e-66
Oligodendrocytes	Slc25a27	-0.308266	0.39	0.225	1.58037e-90	3.40855e-86
Oligodendrocytes	Ank3	-0.308555	0.863	0.702	1.45177e-91	3.13118e-87
Oligodendrocytes	Rasgrp3	-0.309283	0.289	0.156	3.6379e-77	7.84623e-73
Oligodendrocytes	Klhl4	-0.309293	0.22	0.117	1.13315e-60	2.44398e-56
Oligodendrocytes	Zmym4	-0.310187	0.229	0.124	3.08968e-61	6.66383e-57
Oligodendrocytes	Rybp	-0.31039	0.199	0.11	2.31732e-50	4.998e-46
Oligodendrocytes	Qk	-0.310623	0.928	0.84	2.67784e-107	5.77557e-103
Oligodendrocytes	Lcorl	-0.31075	0.362	0.218	1.74629e-73	3.7664e-69
Oligodendrocytes	Sema6d	-0.311045	0.457	0.294	7.5892e-74	1.63684e-69
Oligodendrocytes	Pafah1b1	-0.311518	0.516	0.329	4.0414e-87	8.71649e-83
Oligodendrocytes	Fam171a1	-0.311602	0.128	0.062	4.46837e-44	9.63739e-40
Oligodendrocytes	Znrf3	-0.311772	0.131	0.06	6.88666e-50	1.48531e-45
Oligodendrocytes	Elp4	-0.312104	0.206	0.112	7.96468e-55	1.71782e-50
Oligodendrocytes	Ehbp1	-0.312448	0.263	0.152	4.07833e-61	8.79614e-57
Oligodendrocytes	Dusp16	-0.312747	0.26	0.141	1.86124e-70	4.01431e-66
Oligodendrocytes	1700085D07Rik	-0.314355	0.134	0.062	4.55209e-50	9.81795e-46
Oligodendrocytes	1110051M20Rik	-0.316279	0.194	0.102	1.83491e-56	3.95754e-52
Oligodendrocytes	Slc16a7	-0.317583	0.209	0.107	8.64404e-63	1.86435e-58
Oligodendrocytes	Slc20a2	-0.318129	0.307	0.157	3.7224e-94	8.02847e-90
Oligodendrocytes	Spire1	-0.318397	0.212	0.101	7.12824e-76	1.53742e-71
Oligodendrocytes	Gm35188	-0.318541	0.21	0.126	1.81458e-43	3.91368e-39
Oligodendrocytes	Ankhd1	-0.319224	0.335	0.19	1.13214e-83	2.4418e-79
Oligodendrocytes	Psme4	-0.320306	0.295	0.17	5.53788e-69	1.19441e-64
Oligodendrocytes	Gpm6b	-0.320369	0.731	0.539	1.66918e-85	3.60009e-81
Oligodendrocytes	Hdac9	-0.32041	0.193	0.108	2.46111e-48	5.30812e-44
Oligodendrocytes	Man1a	-0.322213	0.154	0.085	5.40988e-38	1.1668e-33
Oligodendrocytes	Arhgap32	-0.322617	0.275	0.155	5.30031e-68	1.14317e-63
Oligodendrocytes	Sh3tc2	-0.322951	0.192	0.099	1.87085e-58	4.03504e-54
Oligodendrocytes	Nxpe3	-0.32375	0.19	0.098	1.5695e-57	3.38511e-53
Oligodendrocytes	Zfp608	-0.323989	0.357	0.212	5.07096e-76	1.09371e-71
Oligodendrocytes	Gm48678	-0.324179	0.329	0.188	3.12561e-78	6.74132e-74
Oligodendrocytes	Fnip2	-0.324694	0.197	0.095	4.5404e-68	9.79274e-64
Oligodendrocytes	Strn3	-0.325926	0.348	0.206	5.23144e-74	1.12832e-69
Oligodendrocytes	Strbp	-0.3262	0.337	0.204	5.52889e-68	1.19247e-63
Oligodendrocytes	Bckdhb	-0.327212	0.162	0.081	6.46418e-53	1.3942e-48
Oligodendrocytes	Gm48371	-0.328971	0.118	0.053	2.9604e-47	6.38499e-43
Oligodendrocytes	Kansl1l	-0.330479	0.319	0.18	7.74461e-78	1.67036e-73
Oligodendrocytes	Arhgap23	-0.331097	0.71	0.505	1.49957e-84	3.23428e-80
Oligodendrocytes	Tcf20	-0.331831	0.22	0.115	2.55148e-65	5.50304e-61
Oligodendrocytes	Rapgef5	-0.332107	0.177	0.087	1.08594e-57	2.34216e-53
Oligodendrocytes	Usp6nl	-0.333229	0.219	0.115	4.09191e-64	8.82542e-60
Oligodendrocytes	Cask	-0.333714	0.185	0.096	2.78272e-55	6.00177e-51
Oligodendrocytes	Scfd2	-0.33446	0.156	0.072	2.251e-58	4.85495e-54
Oligodendrocytes	Rapgef2	-0.335128	0.219	0.123	3.5998e-55	7.76404e-51
Oligodendrocytes	Il1rap	-0.335468	0.543	0.349	2.97538e-92	6.41729e-88
Oligodendrocytes	Ppp2r3a	-0.336257	0.55	0.356	7.84141e-85	1.69124e-80
Oligodendrocytes	Tjp1	-0.336264	0.406	0.248	5.89533e-79	1.2715e-74
Oligodendrocytes	Sil1	-0.33666	0.148	0.069	2.07854e-54	4.483e-50
Oligodendrocytes	Spop	-0.337399	0.268	0.145	8.03372e-73	1.73271e-68
Oligodendrocytes	Slc8a3	-0.338754	0.142	0.067	8.68771e-51	1.87377e-46
Oligodendrocytes	Nsmce2	-0.340211	0.252	0.133	2.33999e-72	5.0469e-68
Oligodendrocytes	Ap3b1	-0.340466	0.252	0.133	1.0476e-74	2.25946e-70
Oligodendrocytes	BC052040	-0.340523	0.148	0.074	2.62137e-48	5.65378e-44
Oligodendrocytes	Bcl2l1	-0.340614	0.365	0.204	7.42544e-93	1.60152e-88
Oligodendrocytes	Nr6a1	-0.340686	0.154	0.078	1.92531e-48	4.15252e-44
Oligodendrocytes	Csrp1	-0.341961	0.435	0.261	1.4596e-91	3.14806e-87
Oligodendrocytes	Gm36975	-0.34205	0.166	0.086	1.29327e-49	2.78932e-45
Oligodendrocytes	Aig1	-0.342301	0.408	0.247	6.25513e-84	1.34911e-79
Oligodendrocytes	Atp8b1	-0.342572	0.257	0.138	5.65931e-72	1.2206e-67
Oligodendrocytes	Zfp609	-0.343078	0.227	0.121	8.57024e-64	1.84843e-59
Oligodendrocytes	Mvb12b	-0.343106	0.23	0.124	2.10432e-64	4.5386e-60
Oligodendrocytes	Kif16b	-0.343512	0.2	0.101	6.68704e-65	1.44226e-60
Oligodendrocytes	Arsg	-0.344097	0.294	0.158	4.48758e-83	9.67882e-79
Oligodendrocytes	Amy1	-0.344127	0.197	0.095	2.70533e-69	5.83485e-65
Oligodendrocytes	Lsamp	-0.345607	0.296	0.2	3.03479e-40	6.54542e-36
Oligodendrocytes	Lin52	-0.34585	0.15	0.071	1.88001e-54	4.0548e-50
Oligodendrocytes	Ube2h	-0.346968	0.228	0.117	9.80389e-71	2.1145e-66
Oligodendrocytes	Supt3	-0.347133	0.197	0.098	4.15331e-64	8.95785e-60
Oligodendrocytes	Gm42413	-0.347903	0.388	0.231	1.65568e-82	3.57097e-78
Oligodendrocytes	Gmds	-0.348506	0.166	0.085	2.21476e-51	4.7768e-47
Oligodendrocytes	Pclo	-0.348666	0.27	0.152	7.6991e-67	1.66054e-62
Oligodendrocytes	Rnf216	-0.348832	0.261	0.139	2.3841e-74	5.14202e-70
Oligodendrocytes	Ppp1r16b	-0.349501	0.663	0.45	2.42481e-96	5.22982e-92
Oligodendrocytes	Rims2	-0.34977	0.111	0.037	5.66315e-65	1.22143e-60
Oligodendrocytes	Dock1	-0.350006	0.514	0.319	9.2552e-95	1.99616e-90
Oligodendrocytes	Ctdspl	-0.350761	0.16	0.07	5.71924e-66	1.23353e-61
Oligodendrocytes	Adipor2	-0.350963	0.345	0.202	2.85968e-75	6.16775e-71
Oligodendrocytes	Zeb2	-0.351212	0.893	0.759	1.47884e-112	3.18956e-108
Oligodendrocytes	Dnajc1	-0.352638	0.303	0.171	4.90737e-75	1.05842e-70
Oligodendrocytes	Rfx3	-0.354209	0.237	0.123	1.10596e-72	2.38534e-68
Oligodendrocytes	Rora	-0.354236	0.126	0.058	6.68209e-47	1.44119e-42
Oligodendrocytes	Dock5	-0.354978	0.441	0.257	1.56793e-102	3.38172e-98
Oligodendrocytes	Gm13963	-0.355317	0.122	0.046	5.63842e-62	1.21609e-57
Oligodendrocytes	Usp32	-0.355565	0.276	0.15	1.5118e-75	3.26064e-71
Oligodendrocytes	Exoc6b	-0.356803	0.733	0.525	3.13115e-91	6.75327e-87
Oligodendrocytes	Wnk1	-0.357386	0.79	0.57	7.06462e-104	1.5237e-99
Oligodendrocytes	Lrrc28	-0.357542	0.229	0.121	2.34192e-66	5.05105e-62
Oligodendrocytes	Gbf1	-0.3584	0.244	0.127	2.25948e-74	4.87326e-70
Oligodendrocytes	Slc24a3	-0.35876	0.152	0.077	4.24726e-47	9.1605e-43
Oligodendrocytes	Plekha5	-0.359222	0.308	0.172	8.17002e-79	1.76211e-74
Oligodendrocytes	Arhgap35	-0.359326	0.212	0.099	4.82983e-78	1.0417e-73
Oligodendrocytes	Sh3d19	-0.359589	0.474	0.292	1.12875e-89	2.43448e-85
Oligodendrocytes	Il1rapl1	-0.359673	0.546	0.389	5.88231e-63	1.2687e-58
Oligodendrocytes	Gm5535	-0.359741	0.186	0.092	1.54453e-61	3.33124e-57
Oligodendrocytes	Wdpcp	-0.360018	0.147	0.064	8.77725e-62	1.89308e-57
Oligodendrocytes	Mtmr3	-0.360074	0.245	0.132	5.43055e-69	1.17126e-64
Oligodendrocytes	Pvt1	-0.360416	0.149	0.065	3.6893e-62	7.95708e-58
Oligodendrocytes	4732471J01Rik	-0.361652	0.181	0.093	5.30023e-56	1.14315e-51
Oligodendrocytes	Enox2	-0.361709	0.167	0.085	3.38878e-53	7.30893e-49
Oligodendrocytes	Kcnab1	-0.362879	0.202	0.109	3.04068e-56	6.55814e-52
Oligodendrocytes	Garem1	-0.363221	0.149	0.064	1.37134e-64	2.95771e-60
Oligodendrocytes	Adgrb3	-0.363553	0.224	0.148	2.34821e-33	5.06463e-29
Oligodendrocytes	Pstpip2	-0.363606	0.392	0.234	2.08601e-82	4.4991e-78
Oligodendrocytes	Clcc1	-0.364012	0.122	0.044	1.42546e-65	3.07443e-61
Oligodendrocytes	Snx29	-0.364374	0.366	0.213	1.91832e-85	4.13742e-81
Oligodendrocytes	Prkcb	-0.364522	0.206	0.096	4.26378e-77	9.19611e-73
Oligodendrocytes	Pls1	-0.365288	0.41	0.24	1.54935e-92	3.34164e-88
Oligodendrocytes	Zfp532	-0.366354	0.396	0.23	9.97962e-93	2.1524e-88
Oligodendrocytes	Otud7b	-0.367071	0.603	0.385	4.35952e-113	9.40261e-109
Oligodendrocytes	Nlgn1	-0.36717	0.4	0.262	1.54063e-60	3.32283e-56
Oligodendrocytes	Elf2	-0.368628	0.241	0.116	1.67914e-84	3.62157e-80
Oligodendrocytes	Fggy	-0.369264	0.144	0.061	1.50888e-62	3.25435e-58
Oligodendrocytes	Arih1	-0.36931	0.352	0.199	2.02095e-90	4.35878e-86
Oligodendrocytes	Setbp1	-0.369575	0.18	0.092	6.26876e-56	1.35205e-51
Oligodendrocytes	Tspan9	-0.370098	0.183	0.102	8.31662e-47	1.79373e-42
Oligodendrocytes	Elovl7	-0.370885	0.461	0.278	2.58406e-98	5.5733e-94
Oligodendrocytes	E130308A19Rik	-0.371835	0.334	0.188	3.57449e-85	7.70946e-81
Oligodendrocytes	Ccser1	-0.374486	0.191	0.115	8.28558e-38	1.78703e-33
Oligodendrocytes	Nlk	-0.375004	0.312	0.173	4.84172e-82	1.04426e-77
Oligodendrocytes	Rap1gds1	-0.375329	0.268	0.135	5.29126e-86	1.14122e-81
Oligodendrocytes	Clmn	-0.376906	0.569	0.364	4.37123e-100	9.42787e-96
Oligodendrocytes	Ncoa2	-0.377846	0.396	0.225	8.8487e-101	1.90849e-96
Oligodendrocytes	Ncoa1	-0.377904	0.287	0.154	2.63924e-82	5.69231e-78
Oligodendrocytes	Tcf12	-0.378931	0.7	0.514	8.21912e-89	1.7727e-84
Oligodendrocytes	Cobll1	-0.380554	0.369	0.212	3.55206e-89	7.66109e-85
Oligodendrocytes	Rnf130	-0.382571	0.248	0.13	3.18896e-75	6.87794e-71
Oligodendrocytes	Kiz	-0.382787	0.166	0.072	1.54857e-70	3.33995e-66
Oligodendrocytes	Diaph2	-0.382911	0.219	0.118	1.24063e-61	2.6758e-57
Oligodendrocytes	AC162302.1	-0.383623	0.205	0.102	9.53104e-71	2.05565e-66
Oligodendrocytes	9130011E15Rik	-0.385037	0.16	0.07	1.09374e-66	2.35899e-62
Oligodendrocytes	Nkx2-2os	-0.38663	0.151	0.071	1.1231e-54	2.4223e-50
Oligodendrocytes	Baz2b	-0.387351	0.654	0.439	7.92969e-104	1.71028e-99
Oligodendrocytes	Map7	-0.387935	0.91	0.74	2.62237e-157	5.65592e-153
Oligodendrocytes	Pak1	-0.389792	0.68	0.456	2.04403e-105	4.40857e-101
Oligodendrocytes	Ncam1	-0.389891	0.766	0.592	4.94019e-108	1.0655e-103
Oligodendrocytes	Ctif	-0.390581	0.207	0.101	2.4793e-72	5.34735e-68
Oligodendrocytes	Gm20275	-0.391034	0.187	0.096	3.91474e-59	8.4433e-55
Oligodendrocytes	Phf21a	-0.391337	0.324	0.186	1.06253e-79	2.29167e-75
Oligodendrocytes	Ttll5	-0.39257	0.463	0.275	1.53779e-101	3.3167e-97
Oligodendrocytes	Nipa1	-0.393572	0.216	0.097	2.07489e-87	4.47513e-83
Oligodendrocytes	Dym	-0.393746	0.17	0.074	6.06262e-73	1.30759e-68
Oligodendrocytes	Btbd9	-0.394008	0.24	0.125	1.65357e-73	3.56643e-69
Oligodendrocytes	Vps8	-0.395224	0.397	0.229	1.86629e-96	4.02521e-92
Oligodendrocytes	St3gal3	-0.395542	0.238	0.114	2.86548e-87	6.18026e-83
Oligodendrocytes	Ankib1	-0.396047	0.466	0.276	6.72569e-106	1.4506e-101
Oligodendrocytes	Ccnd3	-0.39656	0.146	0.06	4.42522e-65	9.54432e-61
Oligodendrocytes	Enpp6	-0.398598	0.214	0.1	5.09367e-78	1.0986e-73
Oligodendrocytes	Mta3	-0.40101	0.29	0.151	2.83661e-92	6.11801e-88
Oligodendrocytes	Klhl2	-0.401677	0.655	0.443	2.09944e-104	4.52806e-100
Oligodendrocytes	Ptprd	-0.402892	0.967	0.911	7.60182e-195	1.63956e-190
Oligodendrocytes	Zfp638	-0.403474	0.552	0.357	4.39902e-100	9.4878e-96
Oligodendrocytes	Dcc	-0.405046	0.388	0.235	2.09647e-78	4.52166e-74
Oligodendrocytes	Xrcc6	-0.408778	0.262	0.133	5.96133e-86	1.28574e-81
Oligodendrocytes	Zfp462	-0.409481	0.265	0.139	3.58138e-80	7.72432e-76
Oligodendrocytes	Scaper	-0.411328	0.335	0.184	2.81422e-93	6.06971e-89
Oligodendrocytes	Abtb2	-0.411565	0.167	0.081	1.54946e-59	3.34187e-55
Oligodendrocytes	Babam2	-0.415186	0.303	0.153	5.85862e-101	1.26359e-96
Oligodendrocytes	Nfia	-0.415533	0.548	0.353	1.79058e-101	3.86193e-97
Oligodendrocytes	Fars2	-0.416026	0.211	0.107	1.81585e-69	3.91643e-65
Oligodendrocytes	Gm36855	-0.417439	0.186	0.084	4.3869e-74	9.46167e-70
Oligodendrocytes	Dock3	-0.417462	0.418	0.238	2.17136e-106	4.68318e-102
Oligodendrocytes	Slco3a1	-0.418649	0.301	0.155	1.77514e-93	3.82863e-89
Oligodendrocytes	Nf1	-0.418829	0.406	0.231	2.61761e-105	5.64566e-101
Oligodendrocytes	Tom1l2	-0.419627	0.374	0.206	5.0588e-104	1.09108e-99
Oligodendrocytes	Slc9a9	-0.420075	0.325	0.186	1.53917e-82	3.31969e-78
Oligodendrocytes	Ano4	-0.424654	0.726	0.538	1.03155e-101	2.22484e-97
Oligodendrocytes	Slc13a1	-0.424725	0.138	0.053	5.53285e-68	1.19332e-63
Oligodendrocytes	Lrrtm3	-0.426945	0.305	0.172	1.21428e-76	2.61895e-72
Oligodendrocytes	Jph1	-0.427412	0.349	0.192	2.52628e-97	5.44869e-93
Oligodendrocytes	Stk39	-0.428286	0.311	0.165	2.47738e-92	5.34322e-88
Oligodendrocytes	Ppfia2	-0.428368	0.248	0.139	5.00054e-64	1.07852e-59
Oligodendrocytes	Pde8a	-0.428645	0.558	0.347	1.76116e-111	3.79847e-107
Oligodendrocytes	Sh3gl3	-0.430048	0.258	0.139	2.62016e-75	5.65116e-71
Oligodendrocytes	Megf10	-0.430374	0.379	0.204	1.92099e-112	4.14318e-108
Oligodendrocytes	Mitf	-0.43148	0.259	0.136	8.94639e-80	1.92956e-75
Oligodendrocytes	Gm26694	-0.433711	0.236	0.124	1.87876e-73	4.05211e-69
Oligodendrocytes	Gm12324	-0.434737	0.188	0.081	2.06356e-82	4.45068e-78
Oligodendrocytes	Pcsk6	-0.4362	0.211	0.09	6.0416e-95	1.30305e-90
Oligodendrocytes	Pcdh11x	-0.438328	0.235	0.128	1.1804e-63	2.54589e-59
Oligodendrocytes	Cdc42bpa	-0.439123	0.744	0.512	1.24845e-137	2.69267e-133
Oligodendrocytes	Macrod2	-0.439157	0.283	0.176	1.68467e-53	3.63349e-49
Oligodendrocytes	Negr1	-0.439674	0.269	0.157	1.26312e-61	2.72429e-57
Oligodendrocytes	Nbas	-0.441882	0.57	0.352	4.91576e-119	1.06023e-114
Oligodendrocytes	Rps6ka5	-0.443774	0.389	0.228	2.82734e-94	6.09801e-90
Oligodendrocytes	Map4	-0.444447	0.592	0.375	5.51251e-126	1.18894e-121
Oligodendrocytes	Gm26936	-0.445526	0.201	0.092	2.64687e-81	5.70877e-77
Oligodendrocytes	Ephb1	-0.446324	0.465	0.28	4.48971e-103	9.68341e-99
Oligodendrocytes	Agmo	-0.446458	0.201	0.109	3.55764e-55	7.67312e-51
Oligodendrocytes	Auts2	-0.447372	0.598	0.413	9.10869e-93	1.96456e-88
Oligodendrocytes	Tmeff1	-0.447606	0.402	0.233	8.05314e-100	1.7369e-95
Oligodendrocytes	Tanc2	-0.450665	0.336	0.18	3.31963e-103	7.15979e-99
Oligodendrocytes	Tspan2	-0.451051	0.623	0.394	3.7073e-132	7.99591e-128
Oligodendrocytes	Eml6	-0.451889	0.279	0.141	3.4267e-92	7.39071e-88
Oligodendrocytes	Gm12353	-0.453025	0.169	0.067	1.81906e-83	3.92335e-79
Oligodendrocytes	Gria4	-0.454969	0.297	0.167	3.14918e-75	6.79215e-71
Oligodendrocytes	Lrba	-0.459725	0.333	0.176	7.29415e-103	1.5732e-98
Oligodendrocytes	Pacrg	-0.461615	0.482	0.257	8.54463e-143	1.84291e-138
Oligodendrocytes	Hdac8	-0.465481	0.222	0.104	6.96582e-85	1.50239e-80
Oligodendrocytes	Tbcd	-0.467645	0.261	0.136	3.26863e-83	7.04978e-79
Oligodendrocytes	Dlg1	-0.469439	0.599	0.379	2.18006e-126	4.70195e-122
Oligodendrocytes	Zfand3	-0.470665	0.238	0.112	1.83609e-93	3.96008e-89
Oligodendrocytes	Sh3kbp1	-0.470711	0.393	0.218	1.88855e-109	4.07323e-105
Oligodendrocytes	Fnbp1	-0.47107	0.846	0.659	1.17307e-176	2.53008e-172
Oligodendrocytes	Mog	-0.471318	0.715	0.509	8.41949e-130	1.81592e-125
Oligodendrocytes	Npas3	-0.471964	0.418	0.244	4.80622e-98	1.0366e-93
Oligodendrocytes	Slc44a1	-0.473756	0.52	0.307	1.14549e-126	2.47059e-122
Oligodendrocytes	Kansl1	-0.474317	0.402	0.228	5.52848e-111	1.19238e-106
Oligodendrocytes	Gm11149	-0.474872	0.318	0.172	3.81809e-94	8.23485e-90
Oligodendrocytes	Ypel2	-0.474963	0.698	0.477	2.60095e-139	5.60974e-135
Oligodendrocytes	Iqsec1	-0.475855	0.423	0.235	3.76638e-119	8.12332e-115
Oligodendrocytes	Nbea	-0.477487	0.651	0.433	1.50383e-124	3.24347e-120
Oligodendrocytes	Gab2	-0.477871	0.191	0.097	1.06977e-63	2.30729e-59
Oligodendrocytes	Vti1a	-0.478369	0.328	0.175	1.31154e-99	2.82873e-95
Oligodendrocytes	Zbtb20	-0.479067	0.704	0.496	1.75491e-133	3.78498e-129
Oligodendrocytes	Srgap1	-0.480336	0.368	0.201	1.29871e-104	2.80106e-100
Oligodendrocytes	Akt3	-0.48144	0.287	0.153	9.63566e-89	2.07822e-84
Oligodendrocytes	Dennd1a	-0.48153	0.386	0.211	4.34667e-114	9.37491e-110
Oligodendrocytes	Dnajc6	-0.485573	0.341	0.178	1.41974e-109	3.0621e-105
Oligodendrocytes	Rap1a	-0.492311	0.443	0.25	1.55762e-122	3.35948e-118
Oligodendrocytes	Cadm2	-0.49312	0.54	0.313	5.94529e-131	1.28228e-126
Oligodendrocytes	Limch1	-0.493598	0.629	0.424	1.68492e-127	3.63404e-123
Oligodendrocytes	Faf1	-0.49363	0.3	0.157	9.08794e-97	1.96009e-92
Oligodendrocytes	Fam19a5	-0.501535	0.241	0.108	4.46999e-101	9.64087e-97
Oligodendrocytes	Smyd3	-0.503768	0.2	0.092	2.94267e-79	6.34675e-75
Oligodendrocytes	Robo1	-0.504366	0.217	0.132	3.51212e-44	7.57494e-40
Oligodendrocytes	Ext1	-0.506446	0.257	0.132	1.12167e-84	2.41922e-80
Oligodendrocytes	Lpgat1	-0.508147	0.526	0.299	6.50984e-148	1.40404e-143
Oligodendrocytes	Dip2c	-0.510814	0.295	0.157	4.99181e-91	1.07663e-86
Oligodendrocytes	Kif6	-0.511809	0.213	0.096	2.61104e-88	5.6315e-84
Oligodendrocytes	Dis3l2	-0.51461	0.357	0.186	7.49774e-119	1.61711e-114
Oligodendrocytes	Fam172a	-0.516004	0.408	0.224	3.95562e-123	8.53149e-119
Oligodendrocytes	Hipk2	-0.516567	0.558	0.336	9.37512e-139	2.02203e-134
Oligodendrocytes	Gnaq	-0.518703	0.394	0.205	5.33243e-132	1.1501e-127
Oligodendrocytes	Gtdc1	-0.519333	0.214	0.101	7.24114e-81	1.56177e-76
Oligodendrocytes	Vps13b	-0.519587	0.388	0.199	1.61643e-136	3.48632e-132
Oligodendrocytes	Mob3b	-0.523136	0.285	0.147	3.74505e-94	8.07733e-90
Oligodendrocytes	Slain1	-0.527155	0.567	0.337	2.87843e-150	6.20821e-146
Oligodendrocytes	Kif13a	-0.529058	0.551	0.334	1.90287e-134	4.1041e-130
Oligodendrocytes	Ambra1	-0.530467	0.338	0.165	2.34232e-128	5.05191e-124
Oligodendrocytes	Cpeb3	-0.532269	0.349	0.176	4.63796e-125	1.00032e-120
Oligodendrocytes	Grid2	-0.533204	0.513	0.315	6.4149e-115	1.38357e-110
Oligodendrocytes	Immp2l	-0.540155	0.175	0.091	6.40831e-53	1.38214e-48
Oligodendrocytes	Edil3	-0.543107	0.821	0.698	3.70285e-164	7.98632e-160
Oligodendrocytes	Opcml	-0.546761	0.378	0.208	2.17817e-110	4.69789e-106
Oligodendrocytes	Rabgap1l	-0.54833	0.503	0.29	8.13547e-139	1.75466e-134
Oligodendrocytes	Exoc4	-0.54861	0.461	0.259	1.41975e-139	3.06211e-135
Oligodendrocytes	Plekhg1	-0.550422	0.557	0.328	1.78276e-151	3.84506e-147
Oligodendrocytes	Cdk19	-0.552614	0.629	0.403	4.59295e-142	9.90607e-138
Oligodendrocytes	Pard3	-0.555871	0.501	0.282	1.99126e-145	4.29475e-141
Oligodendrocytes	Pip4k2a	-0.55845	0.48	0.263	1.34791e-152	2.90717e-148
Oligodendrocytes	2610035D17Rik	-0.564674	0.346	0.175	5.84422e-123	1.26048e-118
Oligodendrocytes	Ispd	-0.565895	0.256	0.116	1.26842e-108	2.73574e-104
Oligodendrocytes	Insc	-0.566971	0.32	0.147	8.48041e-139	1.82905e-134
Oligodendrocytes	Nkain1	-0.569548	0.348	0.171	2.69858e-135	5.8203e-131
Oligodendrocytes	Slc22a23	-0.569618	0.403	0.212	1.12698e-135	2.43066e-131
Oligodendrocytes	Cdh19	-0.571492	0.495	0.286	1.51551e-141	3.26866e-137
Oligodendrocytes	D7Ertd443e	-0.572461	0.405	0.209	1.62444e-143	3.5036e-139
Oligodendrocytes	Arhgap39	-0.576454	0.361	0.172	1.40699e-147	3.0346e-143
Oligodendrocytes	Gna12	-0.579037	0.398	0.205	2.58504e-141	5.57541e-137
Oligodendrocytes	Kcnk13	-0.579313	0.353	0.185	2.01815e-116	4.35274e-112
Oligodendrocytes	Pkp4	-0.583455	0.546	0.318	9.05036e-159	1.95198e-154
Oligodendrocytes	Retreg1	-0.585187	0.376	0.178	1.00501e-157	2.16761e-153
Oligodendrocytes	Wipf1	-0.585695	0.427	0.228	4.8827e-141	1.0531e-136
Oligodendrocytes	Lrp1b	-0.589339	0.807	0.704	5.94297e-154	1.28178e-149
Oligodendrocytes	Gas7	-0.589869	0.392	0.208	3.14173e-130	6.77608e-126
Oligodendrocytes	Mbd5	-0.590024	0.398	0.206	3.42637e-140	7.39e-136
Oligodendrocytes	Arhgef28	-0.590344	0.438	0.231	8.70819e-151	1.87818e-146
Oligodendrocytes	Tmtc2	-0.59335	0.372	0.214	2.57104e-102	5.54522e-98
Oligodendrocytes	Dock10	-0.594361	0.826	0.663	1.44374e-201	3.11386e-197
Oligodendrocytes	Spock3	-0.59628	0.365	0.198	3.58531e-108	7.73279e-104
Oligodendrocytes	Fbxl17	-0.606524	0.326	0.158	6.21842e-128	1.34119e-123
Oligodendrocytes	Acyp2	-0.610469	0.263	0.12	5.8232e-110	1.25595e-105
Oligodendrocytes	Ptprk	-0.615851	0.607	0.364	3.14252e-167	6.7778e-163
Oligodendrocytes	Ank	-0.619577	0.412	0.211	1.03713e-152	2.23689e-148
Oligodendrocytes	Shroom3	-0.62194	0.176	0.072	1.31952e-84	2.84595e-80
Oligodendrocytes	Gm28376	-0.622682	0.322	0.16	3.57252e-118	7.7052e-114
Oligodendrocytes	Lrmda	-0.625527	0.15	0.064	5.77984e-66	1.2466e-61
Oligodendrocytes	Sorcs1	-0.626688	0.538	0.313	1.11183e-149	2.398e-145
Oligodendrocytes	Stxbp6	-0.628057	0.479	0.267	9.6384e-150	2.07881e-145
Oligodendrocytes	Ptprm	-0.628344	0.258	0.103	8.64516e-133	1.86459e-128
Oligodendrocytes	Apba1	-0.639288	0.364	0.184	8.96398e-137	1.93335e-132
Oligodendrocytes	Gm20388	-0.648641	0.455	0.238	1.37241e-162	2.96001e-158
Oligodendrocytes	Akap6	-0.65136	0.401	0.201	1.04485e-159	2.25353e-155
Oligodendrocytes	Ssh2	-0.652588	0.536	0.3	9.95104e-178	2.14624e-173
Oligodendrocytes	Tbc1d5	-0.658354	0.633	0.379	1.70243e-186	3.67179e-182
Oligodendrocytes	Gab1	-0.660052	0.551	0.315	2.10022e-172	4.52975e-168
Oligodendrocytes	Rab31	-0.661035	0.46	0.238	4.98047e-170	1.07419e-165
Oligodendrocytes	Tmeff2	-0.668669	0.74	0.582	9.04066e-166	1.94989e-161
Oligodendrocytes	Kcnq3	-0.66919	0.566	0.347	2.37147e-153	5.11478e-149
Oligodendrocytes	Rftn1	-0.67415	0.282	0.121	8.84524e-135	1.90774e-130
Oligodendrocytes	Lrrc4c	-0.67743	0.524	0.312	3.7849e-144	8.16328e-140
Oligodendrocytes	Myo1d	-0.67867	0.515	0.282	1.13499e-179	2.44794e-175
Oligodendrocytes	Rere	-0.680882	0.53	0.288	4.96596e-188	1.07106e-183
Oligodendrocytes	Mdga2	-0.690667	0.531	0.318	2.15436e-148	4.64652e-144
Oligodendrocytes	Grik2	-0.690998	0.571	0.332	1.12562e-173	2.42774e-169
Oligodendrocytes	Synpr	-0.695126	0.162	0.076	2.46529e-62	5.31714e-58
Oligodendrocytes	4930419G24Rik	-0.707233	0.333	0.16	2.80988e-134	6.06036e-130
Oligodendrocytes	Tspan5	-0.724073	0.379	0.184	1.33033e-158	2.86925e-154
Oligodendrocytes	St6gal1	-0.724995	0.4	0.192	1.33455e-175	2.87836e-171
Oligodendrocytes	Gphn	-0.72909	0.59	0.334	4.2579e-205	9.18344e-201
Oligodendrocytes	Agap1	-0.72953	0.593	0.338	4.35197e-211	9.38634e-207
Oligodendrocytes	Camkmt	-0.736269	0.273	0.115	1.08717e-137	2.34482e-133
Oligodendrocytes	Plxdc2	-0.741631	0.674	0.415	9.88879e-228	2.13281e-223
Oligodendrocytes	Zfp536	-0.748793	0.647	0.398	3.35871e-213	7.24407e-209
Oligodendrocytes	A330015K06Rik	-0.759353	0.318	0.137	5.37752e-157	1.15982e-152
Oligodendrocytes	A230001M10Rik	-0.763178	0.445	0.209	8.17349e-204	1.76286e-199
Oligodendrocytes	Bcas3	-0.763907	0.441	0.222	1.13578e-185	2.44964e-181
Oligodendrocytes	Dlg2	-0.764912	0.646	0.4	7.22583e-217	1.55847e-212
Oligodendrocytes	Luzp2	-0.77078	0.264	0.103	5.55421e-144	1.19793e-139
Oligodendrocytes	Wwox	-0.771665	0.332	0.162	7.25857e-133	1.56553e-128
Oligodendrocytes	Sik3	-0.778465	0.605	0.359	5.05395e-208	1.09004e-203
Oligodendrocytes	A330049N07Rik	-0.790672	0.355	0.154	3.89726e-178	8.40561e-174
Oligodendrocytes	Ncam2	-0.792649	0.583	0.322	2.6766e-207	5.77288e-203
Oligodendrocytes	Fmnl2	-0.793504	0.467	0.239	9.31529e-189	2.00912e-184
Oligodendrocytes	Elmo1	-0.79408	0.645	0.36	1.62207e-259	3.49848e-255
Oligodendrocytes	Enox1	-0.794556	0.509	0.256	1.1042e-224	2.38154e-220
Oligodendrocytes	Unc5c	-0.824249	0.62	0.375	1.41995e-217	3.06254e-213
Oligodendrocytes	Xkr4	-0.84232	0.384	0.188	2.52813e-166	5.45268e-162
Oligodendrocytes	March1	-0.844263	0.438	0.233	4.54561e-162	9.80398e-158
Oligodendrocytes	Cdh20	-0.84823	0.52	0.282	6.21555e-197	1.34057e-192
Oligodendrocytes	Ube2e2	-0.848682	0.552	0.295	8.52213e-224	1.83805e-219
Oligodendrocytes	Rnf220	-0.85953	0.665	0.404	8.46694e-251	1.82615e-246
Oligodendrocytes	Ninj2	-0.866735	0.385	0.177	8.42447e-185	1.81699e-180
Oligodendrocytes	Hecw2	-0.875155	0.56	0.287	2.86453e-258	6.17822e-254
Oligodendrocytes	Park2	-0.881273	0.464	0.232	6.75863e-206	1.4577e-201
Oligodendrocytes	Gm16168	-0.891089	0.537	0.288	4.54297e-212	9.79828e-208
Oligodendrocytes	Prr5l	-0.892566	0.675	0.4	1.6172e-283	3.48799e-279
Oligodendrocytes	Palm2	-0.902332	0.339	0.141	1.69231e-183	3.64997e-179
Oligodendrocytes	Fmn1	-0.902682	0.404	0.172	1.64022e-223	3.53762e-219
Oligodendrocytes	Magi2	-0.910224	0.751	0.55	5.55981e-270	1.19914e-265
Oligodendrocytes	Otud7a	-0.921515	0.362	0.15	1.01451e-206	2.1881e-202
Oligodendrocytes	B3galt1	-0.93106	0.507	0.244	5.66656e-244	1.22216e-239
Oligodendrocytes	Dgki	-0.933256	0.448	0.219	2.45723e-205	5.29975e-201
Oligodendrocytes	Naaladl2	-0.948105	0.434	0.209	1.09579e-201	2.36339e-197
Oligodendrocytes	Ctnna2	-0.966878	0.492	0.271	4.1625e-188	8.97768e-184
Oligodendrocytes	Phlpp1	-0.974433	0.716	0.456	0	0
Oligodendrocytes	Pde4b	-0.987477	0.801	0.662	1.11218e-270	2.39875e-266
Oligodendrocytes	Grm3	-1.01688	0.61	0.343	7.94862e-282	1.71436e-277
Oligodendrocytes	St6galnac3	-1.0184	0.652	0.379	0	0
Oligodendrocytes	St18	-1.05481	0.7	0.447	0	0
Oligodendrocytes	Tmem178b	-1.0579	0.616	0.325	0	0
Oligodendrocytes	Mon2	-1.0785	0.524	0.195	0	0
Oligodendrocytes	Slc24a2	-1.08621	0.851	0.691	0	0
Oligodendrocytes	Pcdh9	-1.0981	0.868	0.773	1.29576e-289	2.7947e-285
Oligodendrocytes	Ctnna3	-1.10487	0.584	0.321	2.62015e-282	5.65113e-278
Oligodendrocytes	Slc8a1	-1.10677	0.519	0.254	9.75626e-276	2.10423e-271
Oligodendrocytes	Prickle2	-1.11409	0.583	0.3	0	0
Oligodendrocytes	Erbb4	-1.13583	0.584	0.306	1.2045e-303	2.59786e-299
Oligodendrocytes	Grm7	-1.1718	0.342	0.154	1.2798e-167	2.76027e-163
Oligodendrocytes	Frmd5	-1.17901	0.645	0.379	0	0
Oligodendrocytes	Nkain2	-1.23871	0.626	0.357	0	0
Oligodendrocytes	Plcl1	-1.28124	0.616	0.342	0	0
Oligodendrocytes	Ndst4	-1.56748	0.305	0.016	0	0
Oligodendrocytes	Kirrel3	-1.59406	0.279	0.102	8.81934e-179	1.90215e-174
