# Supplementary material for: Beyond Quiescent and Active: Intermediate Microglial Transcriptomic States in a Mouse Model of Down Syndrome
Source: Int J Mol Sci. 2024 Mar 14;25(6):3289. doi: 10.3390/ijms25063289 (PMC10970051; doi:10.3390/ijms25063289)
Supplement: Supplementary file 1 [file ijms-25-03289-s001.zip › Supplementary table S2_markers.xlsx]

## Sheet: Sheet1
Supplementary Table 2. Cluster-specific marker genes for the different cellular subpopulations
Columns A-I give statistics on cell type marker genes. WT and TS_avg_log2FC is the log fold change in the expression levels of a gene between the specific cell type and all the other cell types for WT and TS groups, respectively. pct.1 is the percentage of single cells in which a gene is expressed for the specific cell type and pct.2 is the percentage expression in all other single cells. Minimum…
Cell type	genes	WT_avg_log2FC	WT_pct.1	WT_pct.2	TS_avg_log2FC	TS_pct.1	TS_pct.2	Minimum_p_val		OLIG	ASTR	MG	NEU	END
OLIG	St18	4.14289	0.7	0.066	3.42259	0.447	0.038	0		St18	Rgs20	Mgat4a	Sntg1	Col3a1
OLIG	Tmeff2	4.13673	0.74	0.183	3.9605	0.582	0.124	0		Tmeff2	Adhfe1	Slc40a1	3110035E14Rik	Aox3
OLIG	Tmbim1	1.49283	0.471	0.088	1.57251	0.368	0.093	0		Tmbim1	Prex2	Casp8	Kcnb2	Hmcn1
OLIG	Dnajb2	1.65144	0.507	0.093	2.00354	0.455	0.094	0		Dnajb2	Paqr8	A630001G21Rik	Kcnq5	Lamc3
OLIG	Dock10	2.41372	0.826	0.334	1.92612	0.663	0.267	0		Dock10	Adgrb3	Inpp5d	Rims1	Slc38a11
OLIG	Cntn2	2.40445	0.661	0.061	2.5942	0.549	0.054	0		Cntn2	Arhgef4	Srgap2	Khdrbs2	Arhgap29
OLIG	Nfasc	1.80253	0.66	0.19	1.50612	0.457	0.169	0		Nfasc	Gm10561	Ptprc	Map2	Flt1
OLIG	Pik3c2b	1.92699	0.513	0.059	2.0315	0.406	0.052	0		Pik3c2b	Gm973	Cfh	Unc80	Col1a2
OLIG	Dnm3	1.71314	0.897	0.381	1.57616	0.808	0.383	0		Dnm3	Plcd4	Ivns1abp	Neu4	Cped1
OLIG	Tmem63a	1.6416	0.443	0.053	1.74547	0.337	0.038	0		Tmem63a	Acsl3	Ncf2	Dpp10	Slc6a13
OLIG	1700047M11Rik	2.0113	0.756	0.176	2.18156	0.659	0.155	0		1700047M11Rik	Ngef	A830008E24Rik	Thsd7b	Slco1a4
OLIG	Abca2	1.66431	0.577	0.119	1.89496	0.521	0.136	0		Abca2	Bcl2	Rcsd1	Brinp3	Rbpms
OLIG	Ptgds	1.59948	0.713	0.331	1.73552	0.765	0.377	0		Ptgds	Gli2	Fcgr3	Ralgps2	Cgnl1
OLIG	Fnbp1	2.18884	0.846	0.327	1.70714	0.659	0.326	0		Fnbp1	Gpr37l1	Fcer1g	Tnr	Tbx18
OLIG	Lrp1b	1.84964	0.807	0.427	1.6015	0.704	0.414	0		Lrp1b	Soat1	Arhgap30	Gm38039	Zic1
OLIG	Zeb2	1.46969	0.893	0.539	1.25345	0.759	0.494	0		Zeb2	Prdx6	F11r	Kcnh7	Zic4
OLIG	Ermn	2.14443	0.517	0.034	2.16278	0.412	0.032	0		Ermn	Pbx1	Cd84	Scn3a	Slc6a20a
OLIG	Grb14	1.76131	0.534	0.097	1.75854	0.375	0.071	0		Grb14	Ccdc190	Apbb1ip	Scn1a	Ebf1
OLIG	Prr5l	3.64974	0.675	0.045	2.94037	0.4	0.028	0		Prr5l	Atp1a2	Ptgs1	Snhg11	Vtn
OLIG	Frmd5	3.6043	0.645	0.126	2.81862	0.379	0.075	0		Frmd5	Fmn2	Capn3	Myt1	Nid1
OLIG	Gatm	1.65305	0.741	0.243	1.79935	0.649	0.208	0		Gatm	Slc30a10	Gpr34	Gria3	Foxc1
OLIG	Mal	1.97915	0.625	0.105	1.98711	0.502	0.094	0		Mal	Slc39a12	Arhgap4	Tenm1	Foxd1
OLIG	Pak7	2.69266	0.712	0.148	2.48374	0.558	0.115	0		Pak7	Nebl	Ophn1	C230004F18Rik	Egflam
OLIG	Ppp1r16b	2.24843	0.663	0.119	2.04212	0.45	0.086	0		Ppp1r16b	Entpd2	Btk	Gria2	Carmn
OLIG	Bcas1	1.21219	0.633	0.184	1.08515	0.453	0.145	0		Bcas1	Itga6	P2ry12	Col11a1	Slc22a8
OLIG	Plp1	3.16134	0.998	0.506	3.22749	0.995	0.491	0		Plp1	Ccdc141	Fcrls	Cxxc4	Uaca
OLIG	Car2	2.64598	0.802	0.129	2.72768	0.759	0.163	0		Car2	Slc1a2	Il6ra	Mmp16	Abcb1a
OLIG	Cldn11	2.05488	0.595	0.079	1.81511	0.411	0.068	0		Cldn11	Pax6	Ctss	Nkain3	Pear1
OLIG	Pex5l	3.5322	0.814	0.1	3.39535	0.675	0.081	0		Pex5l	Mertk	Olfml3	Plppr1	Adgrl4
OLIG	Ankub1	1.32078	0.279	0.015	1.53942	0.225	0.009	0		Ankub1	Slc20a1	Bank1	Brinp1	Cemip
OLIG	Trim59	1.65667	0.375	0.033	1.98226	0.346	0.025	0		Trim59	Cst3	Lyn	Elavl4	Cdh5
OLIG	Trim2	1.58242	0.678	0.252	1.42702	0.514	0.229	0		Trim2	Acss1	Tgfbr1	Epb41	Aldh1a2
OLIG	Hapln2	1.77569	0.354	0.027	2.09498	0.349	0.021	0		Hapln2	Pygb	Csf3r	Rap1gap	Slc13a4
OLIG	Car14	1.36984	0.264	0.019	1.78289	0.253	0.016	0		Car14	Ptprt	Laptm5	Reln	Colec12
OLIG	Tspan2	2.22414	0.623	0.083	1.93275	0.394	0.051	0		Tspan2	Sdc4	C1qb	Lhfpl3	Gm15261
OLIG	Ugt8a	2.53715	0.716	0.118	2.35675	0.554	0.088	0		Ugt8a	Tspan7	C1qc	Dpp6	Myo1b
OLIG	Ank2	1.48505	0.966	0.622	1.69361	0.923	0.578	0		Ank2	Tmem47	C1qa	Pdgfra	Lama1
OLIG	Ttll7	2.69459	0.775	0.117	2.6481	0.63	0.101	0		Ttll7	Dmd	Pik3cd	Miat	Emcn
OLIG	St6galnac3	3.07367	0.652	0.131	2.43161	0.379	0.086	0		St6galnac3	Gdpd2	Rhoh	Cit	Itga1
OLIG	Ptprd	3.55129	0.967	0.331	3.44072	0.911	0.275	0		Ptprd	Phka1	Tec	Srrm3	Mill2
OLIG	Slc24a2	4.16397	0.851	0.142	3.24132	0.691	0.121	0		Slc24a2	Sat1	Tmem119	Nxph1	Rgs5
OLIG	Pde4b	3.82191	0.801	0.276	3.2746	0.662	0.248	0		Pde4b	Mir124-2hg	Selplg	Ptprz1	Dock6
OLIG	Rnf220	3.37625	0.665	0.094	2.67803	0.404	0.078	0		Rnf220	Tnik	Ncf1	Ndnf	Grb10
OLIG	Stmn1	1.18279	0.422	0.11	1.54753	0.419	0.12	0		Stmn1	Slc7a11	Mlxipl	Lrrtm4	Ahnak
OLIG	Qdpr	1.64323	0.442	0.055	1.93842	0.404	0.062	0		Qdpr	Lhfp	Irf5	Fam19a1	Igfbp7
OLIG	Gjc3	1.62817	0.888	0.294	1.78739	0.868	0.272	0		Gjc3	Dclk1	Tbxas1	Ppfibp1	Fzd6
OLIG	Exoc6b	1.80116	0.733	0.307	1.61068	0.525	0.257	0		Exoc6b	Arhgef26	Hpgds	Nav2	Slc47a1
OLIG	Magi1	1.40075	0.715	0.313	1.40327	0.575	0.3	0		Magi1	Gria2	Hk2	Fam189a1	Pdgfrb
OLIG	Frmd4b	1.5223	0.731	0.228	1.38302	0.541	0.183	0		Frmd4b	Bcan	Arhgap25	Ntrk3	Arhgap6
OLIG	Kcna1	2.10075	0.488	0.045	2.07544	0.33	0.033	0		Kcna1	Gm3764	Lair1	Mir9-3hg	Clmp
OLIG	Ppp1r14a	1.26547	0.295	0.024	1.4107	0.248	0.021	0		Ppp1r14a	Sema4a	Pou2f2	Grm5	Adamts12
OLIG	Mag	2.79277	0.858	0.12	3.10312	0.792	0.107	0		Mag	Pbxip1	Tyrobp	Sox6	Itih5
OLIG	Zfp536	2.52627	0.647	0.131	1.93944	0.398	0.097	0		Zfp536	Notch2	Cd33	Xylt1	Col4a6
OLIG	Josd2	1.63762	0.469	0.076	2.03468	0.465	0.08	0		Josd2	S1pr1	Cd37	Kcnq1ot1	Mrvi1
OLIG	Pde8a	2.45192	0.558	0.044	2.05901	0.347	0.037	0		Pde8a	F3	Siglech	Ahi1	Col12a1
OLIG	Sytl2	2.41937	0.594	0.053	2.51011	0.491	0.047	0		Sytl2	Bmpr1b	Lrrk1	Pcdh15	9530026P05Rik
OLIG	Pak1	2.29885	0.68	0.128	1.81394	0.456	0.124	0		Pak1	St6galnac5	Mef2a	Fam155a	Mrc2
OLIG	Ppfibp2	1.76905	0.565	0.104	1.88421	0.456	0.107	0		Ppfibp2	Fut9	AU020206	Mcf2l	Bmp6
OLIG	Ccp110	2.54237	0.731	0.101	2.60219	0.642	0.109	0		Ccp110	Tnc	Fes	Nrg1	Ets1
OLIG	Kctd13	1.71213	0.434	0.052	2.02977	0.376	0.043	0		Kctd13	Gm11266	Tm6sf1	Sgcz	Abcc9
OLIG	Gm4593	2.5964	0.62	0.027	2.79874	0.523	0.022	0		Gm4593	Dab1	Slco2b1	Cacna1a	Sept11
OLIG	C030029H02Rik	3.00099	0.658	0.03	3.0869	0.575	0.03	0		C030029H02Rik	Plpp3	P2ry6	Cdh13	Tgfbr3
OLIG	Kndc1	2.04469	0.493	0.04	2.17587	0.405	0.039	0		Kndc1	Macf1	Pde3b	Erc2	Ddr2
OLIG	Map7	3.38343	0.91	0.135	3.1274	0.74	0.112	0		Map7	Id3	Itgam	Cacna2d3	Col4a1
OLIG	Nkain2	5.00057	0.626	0.113	4.47459	0.357	0.077	0		Nkain2	Arhgef19	Rgs10	Nrg3	Gm26719
OLIG	Ank3	1.36609	0.863	0.346	1.20331	0.702	0.285	0		Ank3	Prdm16	Epb41l2	3632451O06Rik	Nr2f2
OLIG	Dip2a	1.81247	0.568	0.107	1.90958	0.455	0.1	0		Dip2a	Hes5	Vsir	Mir124a-1hg	Rai14
OLIG	Ano4	2.77363	0.726	0.144	2.47475	0.538	0.108	0		Ano4	Fgfr3	Arhgap45	Igsf9b	Hmgcs2
OLIG	Arhgef10	1.99799	0.556	0.073	1.96339	0.412	0.069	0		Arhgef10	Sorcs2	Gna15	Opcml	Itpr1
OLIG	Klhl2	2.42607	0.655	0.104	2.10119	0.443	0.084	0		Klhl2	Ppargc1a	Gmip	Cspg4	Cp
OLIG	Mast3	2.0197	0.633	0.1	1.79035	0.429	0.083	0		Mast3	C030018K13Rik	Adcy7	Tpm1	Clec2d
OLIG	Fa2h	2.28755	0.617	0.077	2.07103	0.434	0.062	0		Fa2h	Gabra2	Lpcat2	Unc13c	Dcdc2a
OLIG	Usp54	1.84204	0.639	0.148	1.73042	0.476	0.155	0		Usp54	Gabrb1	Zfhx3	Cacna2d2	Lef1
OLIG	Zdhhc20	1.67355	0.65	0.21	1.74352	0.519	0.182	0		Zdhhc20	Slc4a4	Maf	Arpp21	Dcn
OLIG	Kif13b	2.00976	0.747	0.218	2.01174	0.627	0.189	0		Kif13b	Sparcl1	Irf8	Bcl11a	Egfl7
OLIG	Stmn4	1.54121	0.446	0.067	1.48813	0.334	0.061	0		Stmn4	Grk3	Prkcd	5730522E02Rik	Slc16a12
OLIG	Dock5	1.75506	0.441	0.03	1.52095	0.257	0.015	0		Dock5	Msi1	Stab1	Epn2	Col5a2
OLIG	Pcdh9	3.03915	0.868	0.459	2.32788	0.773	0.418	0		Pcdh9	Phkg1	1810011H11Rik	Car10	Fn1
OLIG	Slain1	2.24777	0.567	0.064	1.79491	0.337	0.045	0		Slain1	Ttyh3	Slc7a8	Cacng4	Cldn5
OLIG	Mbnl2	1.41509	0.771	0.399	1.25259	0.608	0.36	0		Mbnl2	Mmd2	Kctd12	Adarb2	Tfpi
OLIG	Dock9	1.0336	0.615	0.278	1.3532	0.526	0.226	0		Dock9	Ptprz1	Fli1	Vcan	Il34
OLIG	Anln	2.51467	0.569	0.04	2.6365	0.455	0.035	0		Anln	Eva1a	Il10ra	Myt1l	Rbms1
OLIG	Sept7	2.18553	0.906	0.382	2.24005	0.815	0.361	0		Sept7	Sfxn5	Ppcdc	Lrfn5	Osmr
OLIG	Jam3	1.42605	0.529	0.147	1.45072	0.427	0.138	0		Jam3	Tprkb	Ctsh	Nrxn3	Pltp
OLIG	Phldb1	2.16595	0.813	0.212	2.34437	0.741	0.197	0		Phldb1	Mgll	Cmtm7	Unc79	Foxp2
OLIG	Dixdc1	2.03067	0.634	0.109	2.23201	0.551	0.098	0		Dixdc1	Aldh1l1	Cx3cr1	Meg3	Eng
OLIG	Trf	1.7954	0.592	0.109	1.92213	0.506	0.101	0		Trf	Adamts9	Ccr5	Ptprn2	Slc16a11
OLIG	Mobp	2.99815	0.81	0.071	2.96514	0.684	0.07	0		Mobp	Lrig1	Ikzf1	Pdzd2	Wnt5a
OLIG	Rtn4	2.0382	0.775	0.261	2.02606	0.632	0.224	0		Rtn4	Slc6a11	Lcp2	Trio	Utrn
OLIG	Efnb3	1.85676	0.449	0.044	2.13973	0.4	0.044	0		Efnb3	Slc6a1	Dock2	Rims2	Dlc1
OLIG	Aspa	2.95275	0.75	0.059	2.99728	0.634	0.055	0		Aspa	Slc25a18	Havcr2	Samd12	Rapgef4
OLIG	Myo1d	2.25021	0.515	0.039	1.64996	0.282	0.029	0		Myo1d	Grin2b	9930111J21Rik2	Pdzrn4	Nupr1
OLIG	Rffl	1.65631	0.479	0.078	1.46129	0.316	0.059	0		Rffl	Slco1c1	Adap2	Lsamp	Ptprb
OLIG	Vmp1	2.17515	0.665	0.143	2.03294	0.489	0.125	0		Vmp1	Gm44257	Adap2os	Dscam	Atp13a5
OLIG	Ypel2	2.81307	0.698	0.08	2.34562	0.477	0.061	0		Ypel2	9430041J12Rik	Abi3	Kcnh8	Ror1
OLIG	Sept4	2.55482	0.794	0.102	2.75792	0.693	0.097	0		Sept4	Ttyh1	Slc16a6	Ptprs	Pcolce
OLIG	Arhgap23	2.56395	0.71	0.106	2.25599	0.505	0.105	0		Arhgap23	Apoe	Abca9	Nrxn1	Kank2
OLIG	Srcin1	1.99964	0.625	0.093	2.13143	0.517	0.091	0		Srcin1	Fxyd1	Cd300c2	Zeb1	Notch3
OLIG	Cnp	1.51401	0.429	0.074	1.57463	0.36	0.077	0		Cnp	Lgi4	Ly86	Gpr17	Arhgap10
OLIG	Mapt	2.56672	0.915	0.286	2.67623	0.834	0.264	0		Mapt	Slc7a10	Susd3	Slc1a1	Lepr
OLIG	Abca8a	1.12752	0.202	0.023	1.67979	0.27	0.031	0		Abca8a	Mfge8	Syk	4430402I18Rik	Col4a5
OLIG	Ttyh2	1.88318	0.504	0.053	1.56396	0.327	0.061	0		Ttyh2	Mical2	Golm1	Stk32a	Rbms3
OLIG	Aatk	2.31921	0.787	0.148	2.51958	0.732	0.174	0		Aatk	Htra1	Mef2c	Gm20642	Isyna1
OLIG	Arrdc3	1.73191	0.495	0.09	1.95978	0.412	0.078	0		Arrdc3	Syne1	Hexb	Clstn2	Akap12
OLIG	Edil3	3.03749	0.821	0.245	2.76524	0.698	0.183	0		Edil3	Nhsl1	Gm5086	Celf4	Slc7a11
OLIG	Mast4	2.82004	0.903	0.305	2.6389	0.803	0.273	0		Mast4	Ddo	Naip5	Sorbs2	Gulp1
OLIG	Erbin	2.21814	0.732	0.229	2.11317	0.554	0.192	0		Erbin	Gja1	Cd180	Fat3	Cxcl12
OLIG	Elovl7	1.88209	0.461	0.039	1.62874	0.278	0.023	0		Elovl7	Fabp7	Pik3cg	Fchsd2	Flrt2
OLIG	Plekhg3	1.49546	0.366	0.032	1.51363	0.267	0.026	0		Plekhg3	Appl2	Pld4	Mgat5b	Pdgfd
OLIG	Plekhh1	2.34924	0.587	0.036	2.23498	0.413	0.031	0		Plekhh1	Rfx4	Ighm	Plekha6	Slc7a2
OLIG	Cipc	1.53417	0.625	0.185	1.60903	0.512	0.19	0		Cipc	Rmst	Fyb	Fam19a2	Ly6c1
OLIG	Enpp2	2.62215	0.895	0.241	2.69787	0.826	0.205	0		Enpp2	Fgd6	Fam105a	Pid1	Col1a1
OLIG	Nrbp2	1.6886	0.692	0.184	1.86138	0.601	0.197	0		Nrbp2	Fgfr1	Sla	Kcnc2	Prkag2
OLIG	Micall1	1.46693	0.407	0.065	1.63135	0.319	0.064	0		Micall1	Slc7a2	Cyth4	Epha3	Lamb2
OLIG	Slc38a2	0.898954	0.648	0.294	1.44624	0.634	0.27	0		Slc38a2	Tenm3	Nfam1	A930009A15Rik	Ranbp3l
OLIG	Sec14l5	2.96725	0.732	0.037	2.84427	0.547	0.026	0		Sec14l5	Gpm6a	Bin2	Ica1	Car4
OLIG	Il1rap	1.70371	0.543	0.129	1.54618	0.349	0.082	0		Il1rap	Palld	Nckap1l	Spon1	Lama4
OLIG	Apod	1.41723	0.543	0.12	1.35302	0.409	0.111	0		Apod	Cpe	Cd86	Tro	Cfh
OLIG	AC110241.2	1.90066	0.348	0.01	1.66941	0.216	0.006	0		AC110241.2	Csgalnact1	Samsn1	Cntn5	Zic2
OLIG	Synj2	1.83502	0.445	0.032	1.90209	0.325	0.029	0		Synj2	Ncan	Runx1	Nmnat2	Adamts10
OLIG	Qk	1.38241	0.928	0.663	1.06311	0.84	0.63	0		Qk	Slc27a1	Fgd2	Ugdh	Sh3pxd2a
OLIG	Mog	2.96757	0.715	0.059	2.49655	0.509	0.051	0		Mog	Nwd1	Rasal3	Susd4	Id1
OLIG	Tubb4a	2.35314	0.604	0.065	2.02357	0.413	0.066	0		Tubb4a	Mt3	Myo1f	Gabrb3	Tmtc4
OLIG	Epb41l3	2.00939	0.644	0.131	2.20556	0.512	0.095	0		Epb41l3	Mt2	Trem2	Eln	Pdzrn3
OLIG	Cdh2	1.90273	0.752	0.277	2.43763	0.623	0.276	0		Cdh2	Mt1	Dennd1c	Megf11	Phldb2
OLIG	Bin1	1.60729	0.702	0.217	1.55009	0.513	0.183	0		Bin1	Fam107a	Csf1r	Cacna1e	Adgrl2
OLIG	Slc12a2	1.94207	0.667	0.153	1.95843	0.516	0.115	0		Slc12a2	Camk2g	Unc93b1	Gpr158	Adgre5
OLIG	Mbp	3.91158	0.996	0.21	3.96386	0.989	0.202	0		Mbp	Vcl	Sipa1	D430041D05Rik	Eya2
OLIG	Neat1	1.78863	0.838	0.341	2.89145	0.914	0.348	0		Neat1	Itih3	Fermt3	Chl1	Ccdc141
OLIG	Myrf	1.74181	0.419	0.04	2.07584	0.398	0.041	0		Myrf	Glud1	Gcnt1	Tacc2	Slc30a10
OLIG	Cdc37l1	1.69744	0.919	0.44	1.74813	0.817	0.407	0		Cdc37l1	Ddhd1	Dock8	Scn2a	Nhsl2
OLIG	Opalin	2.01927	0.487	0.037	1.84104	0.347	0.035	0		Opalin	Ndrg2	Entpd1	Lrrc7	Gcnt2
OLIG	Shtn1	2.62232	0.699	0.084	2.52853	0.542	0.067	0		Shtn1	Gjb6	Blnk	Cacna1c	Ednra
OLIG	Tulp4	1.41591	0.727	0.309	1.23206	0.628	0.383	0		Tulp4	Clu	Pik3ap1	Usp29	Atp1a2
OLIG	Otud7b	1.71654	0.603	0.155	1.49541	0.385	0.115	0		Otud7b	Gpc5	AC149090.1	Tshz2	Wwtr1
OLIG	Spock1	1.89524	0.328	0.034	1.76763	0.241	0.023	0		Spock1	Gpc6	Vav1	Cadps	Ggt5
OLIG	Lgi3	1.50941	0.351	0.03	1.49259	0.25	0.026	0		Lgi3	Cldn10	Mir142hg	Gucy1a2	Acss3
OLIG	Cdk19	2.33383	0.629	0.165	1.85275	0.403	0.153	0		Cdk19	Farp1	P2ry13	Nrg3os	Lrrk1
OLIG	Tyro3	1.266	0.28	0.031	1.56479	0.265	0.035	0		Tyro3	Clybl	Lpar6	Pcsk2	Abcg2
OLIG	Clasp2	1.21508	0.824	0.497	1.08701	0.675	0.449	0		Clasp2	AC154683.1	Hck	Hs6st3	Gjb6
OLIG	A230001M10Rik	2.15242	0.445	0.015	1.41947	0.209	0.009	0		A230001M10Rik	Ntm	Gm31243	Hecw1	Id3
OLIG	Gm42413	1.84103	0.388	0.021	1.50087	0.231	0.021	0		Gm42413	2900052N01Rik	Arhgap22	Arhgap31	Tns2
OLIG	Ankrd28	1.03451	0.722	0.351	1.18957	0.605	0.321	0		Ankrd28	Acsbg1	Arrb2	Dpysl3	Col26a1
OLIG	D7Ertd443e	1.8565	0.405	0.014	1.2992	0.209	0.009	0		D7Ertd443e	Igdcc4	Mylip	Prkg2	Trpc3
OLIG	Rcbtb1	1.55435	0.466	0.085	1.44156	0.314	0.068	0		Rcbtb1	Scg3	Slfn8	Shc4	Fmo1
OLIG	Pls1	1.74665	0.41	0.032	1.39487	0.24	0.025	0		Pls1	Hmgn3	Rbm47	4921534H16Rik	Lhfp
OLIG	Adamtsl1	1.67923	0.386	0.031	1.48895	0.239	0.026	0		Adamtsl1	Slc38a3	Akap13	Kcnd3	Nrp1
OLIG	Smad7	1.1129	0.336	0.072	1.36602	0.313	0.067	0		Smad7	Cspg5	Sirpa	Hs3st5	Plxna2
OLIG	Magi2	2.63025	0.751	0.353	2.08768	0.55	0.316	0		Magi2	Egfr	Il21r	Kcnip1	Abcc4
OLIG	Ctnna3	2.59096	0.584	0.137	1.93778	0.321	0.082	0		Ctnna3	Cpeb4	Lgmn	Fnbp1l	Slc7a1
OLIG	Fgfr2	1.98616	0.683	0.27	1.53443	0.501	0.266	0		Fgfr2	Wwc1	Plcg2	Csmd1	Cast
OLIG	Lpgat1	1.85567	0.526	0.084	1.39685	0.299	0.061	0		Lpgat1	Acsl6	Arap3	Syt1	Col4a2
OLIG	Slc25a13	1.51016	0.385	0.055	1.42593	0.262	0.039	0		Slc25a13	Atp1b2	Mafb	Mmp15	Pde1a
OLIG	Nbas	1.93104	0.57	0.137	1.60631	0.352	0.11	0		Nbas	Abr	Lrmp	S100a3	Plat
OLIG	Tmem117	1.45636	0.261	0.017	1.34379	0.203	0.012	0		Tmem117	Aldoc	4933406I18Rik	Neto1	Tmtc1
OLIG	Phlpp1	2.86271	0.716	0.253	1.92235	0.456	0.242	0		Phlpp1	Msi2	Tmem173	Gm16183	Airn
OLIG	Creb5	1.58662	0.556	0.144	1.36378	0.381	0.124	0		Creb5	Gfap	Spi1	Ptprg	Tns1
OLIG	Myo6	1.15977	0.74	0.3	1.10582	0.603	0.332	0		Myo6	Pitpnc1	Wdfy4	Stxbp5l	Npas2
OLIG	Cyp2j12	1.39584	0.28	0.009	1.24641	0.185	0.005	0		Cyp2j12	Gm11713	Slc11a1	Rbfox1	Atrnl1
OLIG	Jakmip3	1.47158	0.347	0.027	1.30817	0.222	0.022	0		Jakmip3	Fam20a	Cdh23	Sgcd	Zfp423
OLIG	App	1.56312	0.682	0.293	1.2743	0.56	0.336	0		App	Sox9	Tgfb1	Cspg5	Nxn
OLIG	Galnt6	1.31962	0.274	0.015	1.33755	0.195	0.01	0		Galnt6	Grin2c	Aif1	Grin3a	Fbxl7
OLIG	Tppp	1.09324	0.282	0.032	1.33035	0.257	0.041	0		Tppp	Gli3	Ltc4s	Calcrl	Hlf
OLIG	Cyth1	1.54744	0.499	0.112	1.48725	0.34	0.103	0		Cyth1	Carmil1	Lyl1	Slc35f1	Ptpn13
OLIG	Inf2	1.27136	0.43	0.1	1.39205	0.364	0.114	0		Inf2	Id4	Mertk	Dcx	Fstl1
OLIG	Ube2d1	1.35248	0.413	0.08	1.36149	0.296	0.067	0		Ube2d1	Shc3	Tnfrsf11a	Dlgap1	Arhgap20
OLIG	Rnf13	1.17098	0.564	0.21	1.25	0.451	0.186	0		Rnf13	Cxcl14	Rasa4	Kcnk10	Maf
OLIG	Sez6l2	1.53122	0.424	0.063	1.32847	0.275	0.054	0		Sez6l2	Ntrk2	Ctsc	Sez6l	Pard6g
OLIG	Ndrg1	1.27052	0.327	0.04	1.35557	0.233	0.031	0		Ndrg1	Adcy2	Rgs2	Slitrk1	Frmpd4
OLIG	Pstpip2	1.56469	0.392	0.056	1.32308	0.234	0.034	0		Pstpip2	Nr2f1	Plcl2	Cntn6	Svil
OLIG	Atp8a1	1.49321	0.701	0.302	1.22001	0.514	0.269	0		Atp8a1	C130071C03Rik	Tlr7	C1ql1	Palmd
OLIG	Spock3	2.04314	0.365	0.025	1.5037	0.198	0.015	0		Spock3	Nim1k	Marcks	Rab3c	Dab2
OLIG	Trim35	1.0177	0.47	0.173	1.28215	0.418	0.161	0		Trim35	Ntsr2	Cd53	Tub	Pde7b
OLIG	Gpr37	1.3536	0.351	0.041	1.37018	0.254	0.044	0		Gpr37	Id2	Col27a1	Emid1	Rcsd1
OLIG	Sorcs1	1.61523	0.538	0.154	1.48571	0.313	0.084	0		Sorcs1	Dgkb	Gsdmd	Rtl4	Klhdc8b
OLIG	Gm16168	2.76317	0.537	0.08	1.97871	0.288	0.076	0		Gm16168	Nrcam	Dapp1	Cntn1	Ptpn14
OLIG	Plxnb3	1.26462	0.358	0.065	1.23049	0.283	0.062	0		Plxnb3	Trim9	Traf3ip3	Agbl4	Prkg1
OLIG	Aplp1	1.26983	0.482	0.132	1.34416	0.396	0.145	0		Aplp1	Slc1a3	Lacc1	Gm45159	Plce1
OLIG	Sox10	1.03298	0.508	0.166	1.06569	0.411	0.144	0		Sox10	Myo10	Lmo2	Gabrb2	Epha7
OLIG	Carns1	1.40318	0.273	0.016	1.41595	0.19	0.013	0		Carns1	Ctnnd2	Rab3il1	Gpr45	Ece1
OLIG	Phactr1	1.64351	0.643	0.227	1.32023	0.463	0.222	0		Phactr1	Trps1	Pmepa1	Vstm2b	Jag1
OLIG	Tmod2	1.35449	0.533	0.17	1.32391	0.434	0.184	0		Tmod2	Cyp2d22	Frmd4a	Pknox2	Mcc
OLIG	Map4k5	1.31807	0.494	0.149	1.33939	0.371	0.136	0		Map4k5	Mlc1	Skil	Snap25	Runx1t1
OLIG	Ptprk	1.56829	0.607	0.199	1.30405	0.364	0.128	0		Ptprk	Dbx2	Pik3r5	Reep1	Gpc6
OLIG	Sbf1	1.21916	0.397	0.104	1.34279	0.33	0.098	0		Sbf1	Fgd4	Serinc3	Lrp1	Luzp1
OLIG	Adap1	1.24787	0.298	0.03	1.20889	0.208	0.024	0		Adap1	Aifm3	Tcirg1	Adam12	Lmo4
OLIG	Cers2	1.14254	0.36	0.09	1.28364	0.329	0.098	0		Cers2	Prodh	Msn	Slc2a13	Arhgap42
OLIG	Cdc42bpa	1.54407	0.744	0.328	1.23397	0.512	0.284	0		Cdc42bpa	Atp13a4	Pag1	Nrxn2	Lpp
OLIG	Prima1	1.34147	0.286	0.008	1.08957	0.164	0.006	0		Prima1	Kalrn	Plekho1	Ntrk2	St8sia4
OLIG	Ddr1	1.37979	0.455	0.101	1.26918	0.315	0.092	0		Ddr1	Slc15a2	Ctsd	Nav1	Abca9
OLIG	Fign	1.20324	0.335	0.071	1.20128	0.217	0.03	0		Fign	Lsamp	Cflar	Cacna1b	Foxp1
OLIG	Adamtsl4	1.15419	0.231	0.017	1.38102	0.184	0.015	0		Adamtsl4	Zbtb20	Nrros	Ryr3	Ldb2
OLIG	Olfml1	1.45125	0.359	0.038	1.33998	0.241	0.046	0		Olfml1	Tagln3	Itgb5	Rtn1	Cald1
OLIG	Fbxo32	1.2386	0.284	0.036	1.36033	0.22	0.034	0		Fbxo32	Son	Plek	Lrrfip1	Cyth3
OLIG	Agpat4	1.27899	0.43	0.096	1.27282	0.289	0.076	0		Agpat4	Tiam2	Whrn	Bcan	Map3k20
OLIG	Ablim2	1.44458	0.335	0.039	1.3061	0.224	0.037	0		Ablim2	Lix1	B4galt1	Plcb1	Tshz2
OLIG	Tcf12	1.43516	0.7	0.359	1.21506	0.514	0.308	0		Tcf12	Cbs	Gpr183	Gucy2f	Ghr
OLIG	4930419G24Rik	1.76723	0.333	0.013	1.08422	0.16	0.006	0		4930419G24Rik	Cyp4f15	1700017B05Rik	Rlbp1	Sned1
OLIG	Jph1	1.51371	0.349	0.031	1.13871	0.192	0.021	0		Jph1	Ptchd4	Rps6ka1	Fstl5	Sptbn1
OLIG	Cdh19	1.85095	0.495	0.085	1.39369	0.286	0.08	0		Cdh19	Pla2g7	Zfp710	Syt16	Col23a1
OLIG	Usp31	1.39676	0.351	0.074	1.39392	0.264	0.062	0		Usp31	Vegfa	Mctp1	Syt14	Tnfrsf19
OLIG	Slc44a1	1.59506	0.52	0.131	1.31088	0.307	0.095	0		Slc44a1	Dlgap1	Ntpcr	Fry	Dse
OLIG	Kif21a	1.27725	0.576	0.171	1.19211	0.422	0.185	0		Kif21a	Atl2	St3gal6	Galnt13	Tead1
OLIG	Litaf	1.3398	0.365	0.057	1.15519	0.229	0.041	0		Litaf	Nrxn1	Elk3	Sept3	Txnip
OLIG	Nkain1	1.51498	0.348	0.016	0.953175	0.171	0.013	0		Nkain1	Aqp4	Nav3	Uggt2	Sulf1
OLIG	Dpy19l1	1.18879	0.365	0.081	1.19844	0.282	0.075	0		Dpy19l1	Dtna	Sparc	Cers4	Pard3b
OLIG	Slc48a1	1.1729	0.319	0.054	1.27179	0.252	0.057	0		Slc48a1	Psd2	Fchsd2	Sema5b	Efemp1
OLIG	Hecw2	1.97683	0.56	0.131	1.30409	0.287	0.084	0		Hecw2	Mcc	Inpp4b	Abhd2	Epas1
OLIG	Eml1	1.67422	0.373	0.063	1.38459	0.244	0.056	0		Eml1	Kcnn2	8030442B05Rik	Afap1l2	Gm42418
OLIG	Hid1	1.14314	0.262	0.031	1.19932	0.199	0.027	0		Hid1	Pdgfrb	Gtf2h2	Rbms3	Akap13
OLIG	A330049N07Rik	1.8226	0.355	0.014	1.06426	0.154	0.007	0		A330049N07Rik	Mapk4	P3h2	Adgrl3	Bicc1
OLIG	Ninj2	1.84941	0.385	0.042	1.15114	0.177	0.018	0		Ninj2	Gm9925	Ifngr1	Plpp4	Pitpnc1
OLIG	Cpox	1.26194	0.325	0.047	1.24161	0.222	0.04	0		Cpox	Tle4	Cfap74	Ppp2r2b	Klhl23
OLIG	Pacs2	1.50985	0.437	0.078	1.22881	0.275	0.076	0		Pacs2	Rorb	Atp8a2	Utrn	Plekhh2
OLIG	Cep97	1.2784	0.402	0.087	1.28202	0.297	0.09	0		Cep97	Trpm3	Trim30a	Kcnt2	Mpp6
OLIG	Clic4	1.11826	0.31	0.052	1.18369	0.264	0.068	0		Clic4	Glis3	Pros1	Cdk14	Timp3
OLIG	Tmem151a	1.27921	0.297	0.027	1.1364	0.193	0.026	0		Tmem151a	Gldc	Maml3	Scn8a	Rhoj
OLIG	Lpar1	1.21531	0.303	0.028	1.04793	0.182	0.02	0		Lpar1	Lgi1	Pald1	Sema3d	Ano6
OLIG	5031439G07Rik	1.46349	0.463	0.097	1.21673	0.324	0.111	0		5031439G07Rik	Sorbs1	Ehd4	Cpne8	Shc1
OLIG	Tmcc1	1.07171	0.71	0.38	1.0694	0.551	0.34	0		Tmcc1	Gm47423	Camk1	Amz1	Igfbp5
OLIG	Erbb3	1.23613	0.291	0.032	1.17538	0.193	0.026	0		Erbb3	Ahcyl1	Nfatc1	Ptpro	Arhgef25
OLIG	Tmem178b	2.25826	0.616	0.177	1.5271	0.325	0.125	0		Tmem178b	Emp2	Fmnl3	Fgf14	Dtx3
OLIG	Insc	1.39671	0.32	0.015	0.877233	0.147	0.006	0		Insc	Fezf2	Sh3pxd2a	Acp1	Syne2
OLIG	Arhgef2	1.01749	0.442	0.145	1.16304	0.321	0.107	0		Arhgef2	Pou3f2	Rreb1	Lnx1	Notch2
OLIG	Kcnq3	1.82152	0.566	0.175	1.42638	0.347	0.141	0		Kcnq3	Dio2	Itga6	Ccser1	Pdzd2
OLIG	Gas7	1.61657	0.392	0.044	1.075	0.208	0.037	0		Gas7	A330093E20Rik	Asph	Cacna1d	Nebl
OLIG	Ephb1	1.7746	0.465	0.071	1.22717	0.28	0.084	0		Ephb1	Rnf121	Scoc	Prkg1	Tmod3
OLIG	Hhip	1.28267	0.272	0.022	1.08605	0.167	0.017	0		Hhip	Utp14b	Cdk6	Nav3	Tbc1d1
OLIG	Daam1	1.20644	0.663	0.301	1.09511	0.505	0.288	0		Daam1	Caskin1	Tgfbr2	Pkia	Pid1
OLIG	Gab1	1.80145	0.551	0.164	1.42786	0.315	0.12	0		Gab1	Mfap3l	Tbc1d9	Dpyd	Dach1
OLIG	Nfe2l3	1.08161	0.228	0.017	1.07377	0.174	0.021	0		Nfe2l3	Ddah1	Plxna4	Rit2	Sparc
OLIG	Spns2	1.12057	0.267	0.036	1.1371	0.196	0.033	0		Spns2	Gstm1	Lhfpl2	Syn2	Fgfr1
OLIG	Pla2g16	1.33869	0.353	0.051	1.18998	0.24	0.059	0		Pla2g16	Tead1	Gm26778	Itga9	Ptprg
OLIG	Cpm	1.20406	0.257	0.022	1.16348	0.176	0.023	0		Cpm	Rora	Ifngr2	Kcnma1	Frmd6
OLIG	Stxbp6	1.77247	0.479	0.094	1.2457	0.267	0.082	0		Stxbp6	Luzp2	Parp14	Myo16	Tsc22d1
OLIG	Ttll5	1.5789	0.463	0.1	1.22932	0.275	0.088	0		Ttll5	Hopx	Arhgef6	Serpine2	Sdc2
OLIG	Kif13a	1.57794	0.551	0.19	1.29872	0.334	0.139	0		Kif13a	Emx2os	Basp1	Pde10a	Pcca
OLIG	Palm2	1.8163	0.339	0.015	0.965868	0.141	0.009	0		Palm2	Cyp2j9	Nav2	Svil	Adap2
OLIG	Plekhg1	1.83928	0.557	0.115	1.2292	0.328	0.132	0		Plekhg1	Eps8	Tanc2	Asic2	Cpq
OLIG	Ywhaq	1.31702	0.475	0.126	1.06997	0.325	0.121	0		Ywhaq	Tmem44	Map3k5	Astn1	Pde8b
OLIG	Plekha1	1.25949	0.455	0.142	1.20519	0.336	0.133	0		Plekha1	Nckap5	Baz1a	Gria1	March3
OLIG	Inpp5f	1.40695	0.466	0.116	1.16409	0.313	0.117	0		Inpp5f	Ghr	Slc25a37	Rasgrf1	Axin2
OLIG	Arhgef28	1.48889	0.438	0.085	1.01662	0.231	0.059	0		Arhgef28	Gk	Mbnl1	Sdk1	Ggact
OLIG	Limch1	1.65108	0.629	0.211	1.10982	0.424	0.214	0		Limch1	Tnfaip8	Frrs1	Egfem1	Kcnt2
OLIG	Kif1b	1.12744	0.77	0.435	0.905174	0.586	0.406	0		Kif1b	Ppp1r3c	Rapgef5	2900011O08Rik	Klf12
OLIG	Arsg	1.18765	0.294	0.033	0.953133	0.158	0.017	0		Arsg	Sox6	Numb	Ampd3	Mllt3
OLIG	Gm37459	1.19904	0.23	0.009	0.913845	0.133	0.006	0		Gm37459	Wdr17	Evl	Plppr5	Rreb1
OLIG	Gnai1	1.30253	0.315	0.04	0.978161	0.19	0.034	0		Gnai1	Celrr	Man2b1	Gabrg3	Magi3
OLIG	Gm28376	1.55099	0.322	0.022	0.977027	0.16	0.02	0		Gm28376	Ccdc80	Sall1	Fgf12	St5
OLIG	Kcnk13	1.27237	0.353	0.067	0.965471	0.185	0.032	0		Kcnk13	Agl	Fmnl1	Tnik	Zkscan2
OLIG	Tmod1	1.3954	0.328	0.035	1.12089	0.181	0.03	0		Tmod1	Scara3	Plgrkt	Gm20754	Afap1
OLIG	Fam102a	1.03811	0.296	0.057	1.07803	0.224	0.056	0		Fam102a	Sash1	Ski	Astn2	Grk5
OLIG	Prox1	1.06803	0.361	0.088	1.0748	0.256	0.075	0		Prox1	Ptch1	Rel	Dok6	Zfp36l1
OLIG	Zdhhc14	1.33038	0.503	0.17	1.26592	0.317	0.13	0		Zdhhc14	Ranbp3l	B2m	Epha5	Spock2
OLIG	Dlg1	1.6226	0.599	0.212	1.22327	0.379	0.191	0		Dlg1	Ednrb	Cyfip1	Grip1	Arhgef6
OLIG	Atp8b1	1.14919	0.257	0.022	0.898737	0.138	0.01	0		Atp8b1	Paqr6	Slc36a1	Ppm1e	Lamc1
OLIG	Fryl	1.19641	0.559	0.236	1.12226	0.387	0.186	0		Fryl	Mro	Ttc7	Cntn4	Fli1
OLIG	Prickle2	2.76689	0.583	0.157	1.87054	0.3	0.13	0		Prickle2	Tlcd1	Lrch1	Grid1	Galnt17
OLIG	Gal3st1	0.988916	0.266	0.043	0.898138	0.169	0.026	0		Gal3st1	Pnisr	0610040J01Rik	Klhl32	Unc13b
OLIG	Tnfaip6	1.0763	0.245	0.027	1.02374	0.149	0.016	0		Tnfaip6	Tcf4	Vav2	Kank1	Arhgap31
OLIG	Prkcz	1.20268	0.418	0.103	0.995573	0.261	0.082	0		Prkcz	Hnrnpa2b1	Eef2k	Gm38505	Bsg
OLIG	Zfp280c	1.0593	0.506	0.184	1.11534	0.406	0.202	0		Zfp280c	Hdac8	Msh5	Pcdh7	Atxn1
OLIG	Folh1	1.25114	0.368	0.068	1.09789	0.258	0.082	0		Folh1	Tnfrsf19	Ptprj	Eya1	Tec
OLIG	Elavl3	1.06802	0.388	0.121	1.13568	0.282	0.097	0		Elavl3	Ezr	Ankrd44	Ankrd6	Nfat5
OLIG	Csrp1	1.55341	0.435	0.065	1.11624	0.261	0.087	0		Csrp1	Abcd2	Rnf180	Sox5	Slc41a1
OLIG	Tmeff1	1.41437	0.402	0.091	1.05625	0.233	0.067	0		Tmeff1	Cadm1	Irak2	Aff2	Myl6
OLIG	Unc5c	1.42493	0.62	0.229	1.00525	0.375	0.167	0		Unc5c	Adcyap1r1	Pla2g15	Nnat	Rora
OLIG	Kazn	1.14844	0.352	0.074	0.967537	0.205	0.048	0		Kazn	Lgr4	Ptk2b	Gm4876	Ablim1
OLIG	Erbb4	1.79103	0.584	0.175	1.36253	0.306	0.12	0		Erbb4	Arhgap5	Tubgcp5	Mpped2	Rgl1
OLIG	Klhl4	1.15506	0.22	0.01	0.897631	0.117	0.004	0		Klhl4	Hapln1	Coro1a	Me3	Ly6e
OLIG	Mboat1	1.1465	0.28	0.043	1.04881	0.171	0.03	0		Mboat1	Thrsp	Slc1a3	Dmd	Itpkb
OLIG	Plcl1	2.7133	0.616	0.245	2.12699	0.342	0.183	0		Plcl1	Ckb	Mknk1	Klf12	Nedd4
OLIG	Kcna6	1.06135	0.279	0.05	1.05241	0.193	0.043	0		Kcna6	Per3	Lcp1	Nol4	Lrp1
OLIG	A330015K06Rik	1.64699	0.318	0.024	0.95693	0.137	0.014	0		A330015K06Rik	Nnat	Dock4	Chst11	Tnfaip1
OLIG	Ppp2r3a	1.30882	0.55	0.2	1.10254	0.356	0.172	0		Ppp2r3a	Frmd4a	Dusp6	Kcnip3	Ntrk3
OLIG	Ptk2	1.26896	0.663	0.289	1.00029	0.463	0.277	0		Ptk2	C030037D09Rik	Vrk2	Rgcc	Hes1
OLIG	Pkp4	1.51784	0.546	0.165	1.01848	0.318	0.135	0		Pkp4	CT025619.1	Tmsb4x	Ppp1r14c	Flna
OLIG	Dlg2	1.12813	0.646	0.252	0.95176	0.4	0.205	0		Dlg2	Tcf7l2	Snx18	Dscaml1	Chd3
OLIG	Tbc1d5	1.47279	0.633	0.287	1.22646	0.379	0.209	0		Tbc1d5	Gabrg1	Cacnb2	Gpm6a	Pten
OLIG	Snx30	1.02629	0.345	0.09	0.957774	0.228	0.07	0		Snx30	Pard3b	Tpm3	Kcnd2	Dgkh
OLIG	Rftn1	1.24874	0.282	0.027	0.698187	0.121	0.011	0		Rftn1	Pigk	Daglb	Rgs7	Zfhx4
OLIG	Txndc16	1.02988	0.466	0.172	0.976896	0.337	0.155	0		Txndc16	Gpld1	Wasf2	Nrcam	Myh9
OLIG	Eml2	1.04895	0.289	0.051	0.954468	0.169	0.036	0		Eml2	Mras	Smap2	Apba2	Gpcpd1
OLIG	Cpeb2	1.16729	0.461	0.142	0.941957	0.302	0.128	0		Cpeb2	Arhgap26	Rrbp1	Gpc6	H3f3b
OLIG	Apbb2	1.09024	0.524	0.212	0.984999	0.341	0.165	0		Apbb2	Tlr3	Nrip1	Pde7b	Wls
OLIG	Ankib1	1.38928	0.466	0.13	1.02484	0.276	0.111	0		Ankib1	Wwtr1	Tpst2	Ptprt	Cep112
OLIG	Slco3a1	1.22099	0.301	0.05	0.923849	0.155	0.03	0		Slco3a1	Tmem164	Gng2	Mapk10	Ptn
OLIG	Agap1	1.47267	0.593	0.226	1.01162	0.338	0.165	0		Agap1	Grina	Capza2	Arfgef3	St3gal6
OLIG	Adipor2	1.3413	0.345	0.067	1.04785	0.202	0.059	0		Adipor2	Sybu	Ssh2	Shisa7	Pbx3
OLIG	Grm3	2.30383	0.61	0.129	0.966556	0.343	0.161	0		Grm3	Cyp7b1	Map3k14	Dner	Slc23a2
OLIG	Lrrc8b	1.0766	0.27	0.044	0.820681	0.172	0.04	0		Lrrc8b	Cd38	Neurl1a	Shank2	Laptm4a
OLIG	Desi1	1.20752	0.327	0.055	0.910977	0.195	0.056	0		Desi1	Vcam1	Gns	5330417C22Rik	Trpm3
OLIG	Plxdc2	0.721499	0.674	0.279	0.588114	0.415	0.228	0		Plxdc2	Hes1	Hps3	P2ry14	Sptan1
OLIG	Itsn2	1.16883	0.532	0.211	0.999164	0.358	0.187	0		Itsn2	Zeb1	Ints6l	Polg	Mprip
OLIG	Amph	1.15063	0.409	0.131	0.948493	0.258	0.107	0		Amph	Foxg1	Gdi2	Sdc3	Gucy1a2
OLIG	Rap1a	1.22006	0.443	0.138	0.876628	0.25	0.1	0		Rap1a	Sgip1	Celf2	Kit	Adam12
OLIG	Enox1	1.46782	0.509	0.149	0.956747	0.256	0.107	0		Enox1	Ptpn13	Fam102b	Cacna2d1	Unc13c
OLIG	Aig1	1.11825	0.408	0.134	0.918617	0.247	0.099	0		Aig1	Pcdh10	Cttnbp2nl	Mtss1l	Nr2f1
OLIG	Osbpl1a	1.21528	0.435	0.124	1.00755	0.265	0.116	0		Osbpl1a	Lhx2	Grn	Sema5a	Dock7
OLIG	Kctd3	1.26196	0.347	0.079	0.996548	0.206	0.071	0		Kctd3	Kcna2	Pnpla7	Gfra1	Hivep2
OLIG	Dnajc6	1.22967	0.341	0.053	0.711858	0.178	0.053	0		Dnajc6	Pde8b	Sipa1l2	Robo2	Adcy6
OLIG	Ppp2r2a	1.02097	0.452	0.171	0.886517	0.291	0.137	0		Ppp2r2a	Pxdn	Aim2	E130114P18Rik	Rin2
OLIG	Sema6a	1.19431	0.474	0.174	0.90129	0.326	0.168	0		Sema6a	Rasa2	Ctsz	Sipa1l1	Sipa1
OLIG	Dgki	1.86615	0.448	0.115	1.12955	0.219	0.088	0		Dgki	Plxnb1	Ccnd3	Etv4	Gnas
OLIG	Pacrg	2.02589	0.482	0.115	1.502	0.257	0.122	0		Pacrg	Tril	Cds1	Pde4d	Calcrl
OLIG	Wnk1	0.936122	0.79	0.467	0.691552	0.57	0.412	0		Wnk1	Pde7b	Txnip	Hmgcll1	Zbtb20
OLIG	Slc8a1	0.855635	0.519	0.209	0.687881	0.254	0.106	0		Slc8a1	Fjx1	Cst3	Eps8	Fam118b
OLIG	Foxn3	0.873555	0.624	0.327	0.873885	0.431	0.276	0		Foxn3	Col4a5	Sat1	Gsap	Alcam
OLIG	Iqsec1	1.3219	0.423	0.094	0.879833	0.235	0.099	0		Iqsec1	Pfkp	Dennd4a	Trp73	Zbtb4
OLIG	Baz2b	1.10233	0.654	0.348	0.834391	0.439	0.294	0		Baz2b	Notch1	Chd9	Ralyl	Vcl
OLIG	Bcl2l1	1.00681	0.365	0.098	0.801418	0.204	0.077	0		Bcl2l1	Pdlim4	Rp2	Cntnap2	Lima1
OLIG	Mob3b	1.22345	0.285	0.041	0.747405	0.147	0.041	0		Mob3b	Gnao1	Ddx5	Itpr2	Raph1
OLIG	Retreg1	1.02083	0.376	0.099	0.638835	0.178	0.059	0		Retreg1	Wasf3	Slc29a3	Gm45881	Slc4a10
OLIG	Clmn	1.05266	0.569	0.204	0.794561	0.364	0.206	0		Clmn	Jakmip1	Fam49b	Maml2	Pds5b
OLIG	Cdh20	1.88602	0.52	0.158	1.16319	0.282	0.149	0		Cdh20	Ccdc85a	Arsb	Midn	Bzw1
OLIG	Daam2	0.902843	0.589	0.197	0.593621	0.432	0.255	0		Daam2	Itsn1	Dock11	Maml3	Golim4
OLIG	Gna12	1.07836	0.398	0.11	0.700727	0.205	0.082	0		Gna12	Gsap	Elmo1	Zcchc18	Gmds
OLIG	Sik3	1.68998	0.605	0.256	0.983054	0.359	0.23	0		Sik3	Gm15601	Cmtm6	Rgs7bp	Afdn
OLIG	Nbea	0.942577	0.651	0.366	0.758505	0.433	0.29	0		Nbea	Abhd3	Dcakd	Nlgn3	Ogt
OLIG	Slc25a27	1.0535	0.39	0.126	0.815309	0.225	0.1	0		Slc25a27	Mtss1l	Acer3	Sgsm1	Susd6
OLIG	Dpysl2	1.06038	0.499	0.188	0.812678	0.313	0.173	0		Dpysl2	Sox5	Samhd1	Slc22a15	Fcho2
OLIG	Rps6ka5	1.18139	0.389	0.111	0.774028	0.228	0.106	0		Rps6ka5	Dpf3	Ptpn1	Sorcs3	Fry
OLIG	Pip4k2a	0.875439	0.48	0.183	0.682899	0.263	0.133	0		Pip4k2a	Adk	Ppm1h	Sox11	Inpp4b
OLIG	Vps8	1.10822	0.397	0.129	0.75812	0.229	0.11	0		Vps8	Sfxn1	BC037034	Raph1	Kdm7a
OLIG	Dip2b	0.955191	0.503	0.194	0.793383	0.312	0.184	0		Dip2b	Meis2	Tfe3	Myh10	Senp3
OLIG	Ncam1	0.979229	0.766	0.465	0.519434	0.592	0.479	0		Ncam1	Cables1	Rcbtb2	Prkce	Diaph2
OLIG	Ank	1.29113	0.412	0.116	0.765875	0.211	0.099	0		Ank	Gsdme	Pacsin2	Elavl2	Mark1
OLIG	Hipk2	1.2447	0.558	0.245	0.80351	0.336	0.216	0		Hipk2	Prrx1	Camk2d	Gria4	Carmil1
OLIG	Ncam2	1.53958	0.583	0.231	1.12128	0.322	0.21	0		Ncam2	Slitrk2	Ccdc93	Zfpm2	Pbx1
OLIG	Naaladl2	1.67295	0.434	0.125	0.930521	0.209	0.103	0		Naaladl2	Cry2	Arhgap5	Dach1	Snrk
OLIG	Rab31	1.20195	0.46	0.161	0.779024	0.238	0.127	0		Rab31	Timp3	Git2	Hook1	Slc39a10
OLIG	Ube2e2	1.50878	0.552	0.222	0.94021	0.295	0.184	0		Ube2e2	Irak2	Nrp1	Cdh6	Phlda1
OLIG	Tspan5	1.19023	0.379	0.101	0.603515	0.184	0.089	0		Tspan5	Serpine2	Etv6	Grik4	CT025619.1
OLIG	Grik2	1.17525	0.571	0.246	0.75301	0.332	0.227	0		Grik2	Gpam	Hps4	Adcy8	Plcb4
OLIG	Megf10	1.14929	0.379	0.096	0.660104	0.204	0.11	0		Megf10	Aox1	Ubash3b	Rev3l	Pde4d
OLIG	Pard3	1.18312	0.501	0.198	0.698579	0.282	0.184	0		Pard3	Astn1	Snx5	Tsc22d1	Zc3h7a
OLIG	Mink1	0.968992	0.366	0.106	0.815804	0.266	0.127	1.7767e-303		Mink1	Plcb1	Lpin2	D630045J12Rik	Rock2
OLIG	Vldlr	1.06057	0.311	0.07	1.24123	0.276	0.075	1.25734e-302		Vldlr	Fermt2	Myh9	Pde1a	March6
OLIG	Gm48678	1.24088	0.329	0.092	1.01187	0.188	0.074	3.68139e-301		Gm48678	Gm15520	Tacc1	Lima1	Abcd3
OLIG	Enpp6	1.13125	0.214	0.016	0.694716	0.1	0.014	7.77582e-301		Enpp6	Efr3b	Accs	Cdh4	Ccdc82
OLIG	Sh3gl3	1.06331	0.258	0.043	0.676913	0.139	0.033	9.23005e-301		Sh3gl3	Trak1	Pycard	Ptpre	Nbeal1
OLIG	Sh3d19	0.932209	0.474	0.185	0.860013	0.292	0.129	1.52409e-300		Sh3d19	Lpp	Zfp652	Nlgn2	Sobp
OLIG	Rab40c	1.02539	0.32	0.08	0.841478	0.184	0.064	1.6598e-300		Rab40c	Csdc2	Rgl2	Matn4	Fut8
OLIG	Heg1	1.06347	0.263	0.043	0.904932	0.177	0.047	2.13246e-298		Heg1	Glul	St3gal5	Ly6h	Itpr2
OLIG	Itpk1	1.04974	0.286	0.058	0.898259	0.17	0.044	2.35218e-298		Itpk1	Camk2d	Med12l	Map3k1	Serpinb6a
OLIG	Itch	0.813683	0.627	0.333	0.76713	0.487	0.312	3.5376e-298		Itch	Arhgef12	Ptpre	Tmem132d	Extl3
OLIG	Adamts4	1.02829	0.205	0.012	1.06003	0.147	0.009	4.15619e-298		Adamts4	Etv4	Nfatc2	Arhgef3	Wwc2
OLIG	Adamts2	1.00344	0.216	0.019	0.803134	0.12	0.008	6.38776e-297		Adamts2	Daam2	Plxnb2	Celf5	Vps13a
OLIG	Gsn	1.04629	0.289	0.061	0.907573	0.188	0.049	1.05926e-291		Gsn	Trib2	Abhd12	Kcnk2	Acsl1
OLIG	Tmcc2	0.969687	0.246	0.036	0.774205	0.147	0.032	1.53825e-291		Tmcc2	Sh3pxd2b	Arrdc1	Gm49179	Dab2ip
OLIG	Tmem88b	1.14295	0.233	0.029	1.31959	0.21	0.03	1.92047e-288		Tmem88b	Celf2	Ldlrad4	Rbms1	Cdc42
OLIG	St6gal1	1.02382	0.4	0.149	0.525135	0.192	0.109	4.6268e-288		St6gal1	Rapgef3	Macf1	Arhgap44	Pld1
OLIG	Fez1	0.973425	0.34	0.097	0.734462	0.222	0.098	9.63455e-288		Fez1	Rab34	Ttc28	Prrx1	Usp53
OLIG	Mcam	0.996063	0.199	0.012	1.1385	0.164	0.015	2.88268e-286		Mcam	Dzip1l	Skap2	Arvcf	Golgb1
OLIG	Secisbp2l	1.0066	0.371	0.118	1.11906	0.302	0.111	1.22339e-282		Secisbp2l	4930488L21Rik	Dhrs3	Zfp36l1	Tfrc
OLIG	Il33	1.16799	0.213	0.021	1.0694	0.156	0.036	6.31746e-281		Il33	Ivd	Snx29	Tspoap1	Cacna1c
OLIG	Tsc22d3	0.970935	0.25	0.041	0.85841	0.154	0.036	1.40748e-279		Tsc22d3	Mapk10	Pdk1	St7	Lims1
OLIG	Picalm	0.656512	0.616	0.311	0.720675	0.455	0.257	1.17638e-278		Picalm	Pfkm	Itpr2	Tmem196	Gm11713
OLIG	Sort1	0.905638	0.376	0.122	0.765285	0.232	0.116	2.31465e-278		Sort1	Lrp4	Scamp2	Zfp462	Nr3c2
OLIG	Acaca	0.977057	0.487	0.224	0.755993	0.348	0.233	1.4242e-277		Acaca	Echdc2	Acox3	Snx25	Klf9
OLIG	Ralgps1	0.912981	0.481	0.214	0.781438	0.35	0.204	1.67511e-277		Ralgps1	Lcat	Rock2	Sobp	Tcte2
OLIG	Tjap1	0.895809	0.298	0.08	1.58715	0.339	0.092	4.99669e-275		Tjap1	Emx2	Camk1d	Flrt3	Slc3a2
OLIG	Abhd17b	0.936241	0.363	0.119	0.870268	0.275	0.135	2.74831e-274		Abhd17b	Pcdh7	Nuak1	Dnm1	Por
OLIG	Sh3kbp1	0.909986	0.393	0.141	0.634209	0.218	0.101	2.57443e-272		Sh3kbp1	Msmo1	Btg2	Rnf180	Ccnl2
OLIG	Stxbp3	0.91971	0.377	0.129	0.901069	0.278	0.123	5.02482e-269		Stxbp3	Il18	Prex1	Gap43	Tcf7l2
OLIG	Chdh	0.929744	0.2	0.018	1.16308	0.168	0.02	1.97417e-268		Chdh	E130114P18Rik	Myo1b	B230334C09Rik	Lama2
OLIG	Cobll1	0.884831	0.369	0.126	0.67594	0.212	0.088	2.23296e-268		Cobll1	Pld2	Herc2	Plxna2	Rapgef2
OLIG	Wscd1	0.904489	0.332	0.098	0.678535	0.212	0.095	1.421e-267		Wscd1	Mrpl18	Heatr5a	Pitpnm2	Abhd2
OLIG	Prrg1	1.10632	0.27	0.06	0.970146	0.174	0.048	3.8143e-266		Prrg1	Usp53	Arid3b	Dzip1	Prdm5
OLIG	Mtmr2	0.988245	0.277	0.064	0.979483	0.182	0.049	1.1428e-265		Mtmr2	Arrb1	Nfkb1	Usp24	Esyt2
OLIG	Pigz	0.888919	0.197	0.017	0.702247	0.112	0.017	7.84948e-265		Pigz	Spry2	Csad	Ccdc88c	Polk
OLIG	Slc22a23	0.933378	0.403	0.153	0.609915	0.212	0.109	1.29289e-264		Slc22a23	Cachd1	Dtx4	Sgip1	Sgms1
OLIG	Kdm6a	0.918794	0.413	0.165	0.723498	0.258	0.145	1.7044e-263		Kdm6a	Cbx5	Slc4a7	Rimklb	Osbpl9
OLIG	Rtkn2	0.972163	0.19	0.015	0.811581	0.124	0.014	1.71131e-263		Rtkn2	D130040H23Rik	Ifnar2	Tiam1	Rapgef5
OLIG	Tmem98	0.857767	0.183	0.011	0.838491	0.126	0.01	1.02316e-262		Tmem98	Prelid3a	Lrmda	Atp2b2	Pkd1
OLIG	D16Ertd472e	0.974794	0.216	0.028	1.0166	0.153	0.026	8.52848e-262		D16Ertd472e	Timp4	Il6st	Fyn	Limd1
OLIG	Mylk	0.945593	0.205	0.022	1.42342	0.189	0.028	7.46995e-261		Mylk	Apba2	Mtr	Kctd8	Eif4a2
OLIG	Vbp1	0.948597	0.297	0.076	1.17666	0.268	0.08	7.37658e-260		Vbp1	Tiparp	Pid1	Nova1	Csnk1a1
OLIG	Ppp1cc	0.846926	0.161	0.087	1.48645	0.335	0.097	3.9057e-258		Ppp1cc	Sdc2	Kif21b	Chd3	Slc24a3
OLIG	Gm44866	0.861267	0.164	0.004	0.891052	0.146	0.002	4.03933e-258		Gm44866	Igfbp5	Arhgap17	Enah	Col4a3bp
OLIG	Gng11	0.971684	0.225	0.034	1.3481	0.229	0.037	2.57978e-256		Gng11	Asrgl1	Commd8	Zdhhc2	Tjp1
OLIG	Meis1	0.94672	0.27	0.062	0.718933	0.168	0.054	4.66126e-256		Meis1	Hivep3	Slc25a45	Gprasp2	Hnrnph1
OLIG	Pcyt2	0.920127	0.386	0.14	0.749643	0.307	0.183	6.75561e-256		Pcyt2	Itpkb	Rap1gds1	Luzp2	Prickle1
OLIG	Cryab	0.965149	0.253	0.049	1.35376	0.272	0.062	7.4707e-256		Cryab	A830082K12Rik	Lrp1	Med12l	Ptprm
OLIG	9330182L06Rik	0.977475	0.244	0.047	0.872409	0.159	0.036	5.18685e-254		9330182L06Rik	Chst1	Pwwp2a	Spock2	Rhoa
OLIG	Atg4c	0.935604	0.3	0.083	0.870057	0.205	0.067	5.71728e-254		Atg4c	Kbtbd11	Plxdc2	Csmd2	Camk1d
OLIG	Rabgap1l	0.942426	0.503	0.253	0.596292	0.29	0.206	4.42295e-253		Rabgap1l	Map2k6	Sft2d1	Nckap5	Gnb4
OLIG	Pcbp4	0.948905	0.272	0.063	1.12048	0.242	0.073	4.48996e-253		Pcbp4	Tom1l1	Morc3	Sox4	Ifnar1
OLIG	Ift43	0.89707	0.258	0.057	0.773605	0.154	0.045	1.27677e-250		Ift43	Ugp2	Gab2	Ncald	Sos2
OLIG	Abl1	0.862689	0.355	0.122	0.794177	0.236	0.103	1.34735e-250		Abl1	Prkd1	Fam91a1	A230050P20Rik	Slco1c1
OLIG	Fbxl5	0.933822	0.399	0.153	1.04969	0.326	0.144	1.68164e-250		Fbxl5	Pou3f3	Zfp90	Negr1	Stk39
OLIG	Trim36	0.880963	0.202	0.024	0.714163	0.143	0.024	5.4299e-249		Trim36	Eya1	Grk2	Dab1	Arl15
OLIG	Wipf1	0.876291	0.427	0.177	0.558817	0.228	0.119	7.38775e-249		Wipf1	Rnf182	Bmp2k	Fbxl7	Zfand3
OLIG	Atrn	0.843808	0.388	0.147	0.642068	0.241	0.132	1.07003e-248		Atrn	6430573F11Rik	Prcp	Clip4	Tacc1
OLIG	Grm7	1.53416	0.342	0.122	0.781128	0.154	0.072	1.22057e-248		Grm7	Pnpla7	Cebpz	Gsdme	Ppm1e
OLIG	Tnni1	1.14564	0.17	0.009	0.991356	0.116	0.005	1.55102e-248		Tnni1	Cep85l	Fbrsl1	Caskin1	Ezh1
OLIG	Unc5b	0.860592	0.216	0.031	0.727547	0.136	0.033	3.00426e-248		Unc5b	Gpm6b	Rap1b	Ttc3	Osbpl8
OLIG	Wipi1	0.932394	0.249	0.051	0.923622	0.174	0.046	7.44182e-247		Wipi1	Fads1	Syngr1	Ano6	Eif1
OLIG	E130308A19Rik	0.899652	0.334	0.11	0.640176	0.188	0.083	1.08881e-246		E130308A19Rik	Slc1a4	P2rx7	Pcdh17	Nsa2
OLIG	Piga	1.06059	0.21	0.029	1.20156	0.174	0.029	5.76893e-246		Piga	Fam213a	Tnfaip8	Caskin2	Cnbp
OLIG	Hs3st1	0.942489	0.214	0.033	0.636951	0.119	0.031	5.72971e-244		Hs3st1	Ildr2	Crlf3	Ramp1	Baz1b
OLIG	Lzts2	0.890923	0.223	0.037	0.87912	0.152	0.037	8.15113e-243		Lzts2	Wnk2	Arpc1b	Nsg2	Arid5b
OLIG	Oxr1	0.93371	0.465	0.219	1.13612	0.347	0.176	3.49085e-242		Oxr1	Il15ra	Rogdi	Mgat4c	Iqgap1
OLIG	Gm20687	0.833393	0.195	0.025	0.622409	0.127	0.029	9.51949e-241		Gm20687	Dlg5	Cacna1d	Nova2	Igf1r
OLIG	Strn	0.897622	0.29	0.082	0.680435	0.179	0.081	2.25353e-239		Strn	Mir9-3hg	Itpkb	Adgrl1	Akap7
OLIG	Rhou	1.03294	0.22	0.036	1.24139	0.186	0.033	1.64973e-238		Rhou	Nfib	Cryl1	Ankrd11	Cobll1
OLIG	Acap2	0.774291	0.48	0.226	0.704354	0.342	0.202	7.77765e-238		Acap2	Adgrl3	Fus	Ppfia2	Sorbs2
OLIG	March8	0.901869	0.278	0.073	0.776656	0.21	0.085	2.51525e-237		March8	Gna13	Akr1b10	Phactr3	Mical3
OLIG	Asxl3	0.897904	0.283	0.08	0.861565	0.178	0.049	7.69553e-235		Asxl3	Chst2	Picalm	Hip1r	Heg1
OLIG	Pllp	0.855199	0.29	0.082	0.78909	0.186	0.052	2.40326e-234		Pllp	Fbrsl1	Arhgef40	Gpcpd1	Fndc3a
OLIG	Kat2b	0.870769	0.35	0.128	0.725455	0.211	0.11	1.08481e-231		Kat2b	Asap2	Pkn1	Atg16l2	Ttc3
OLIG	Prickle1	0.979527	0.255	0.063	0.791927	0.167	0.068	3.2346e-230		Prickle1	Sema4b	Cux1	Il1rapl1	Setbp1
OLIG	Slc6a6	0.681362	0.38	0.141	0.83377	0.289	0.112	2.60768e-229		Slc6a6	Epha5	Abca1	Zmiz1	Ptgds
OLIG	Arap2	0.789576	0.424	0.176	0.568828	0.296	0.191	3.97377e-229		Arap2	Nphp3	Gusb	Cyfip2	Lars2
OLIG	Parm1	0.839832	0.191	0.025	0.598062	0.104	0.017	1.24178e-227		Parm1	Phactr3	Jmjd1c	Arhgap24	Insr
OLIG	Afap1l1	0.800458	0.206	0.034	0.625109	0.11	0.022	3.24818e-226		Afap1l1	Tulp3	Csnk1e	Trib2	Cdk8
OLIG	Tfdp2	0.848222	0.325	0.11	0.782964	0.234	0.121	2.5368e-225		Tfdp2	Adgrg1	Dock7	Plekha7	Slc38a2
OLIG	Zdhhc9	0.853514	0.209	0.037	0.826606	0.15	0.03	1.00312e-221		Zdhhc9	Spire1	Mapk14	Lpp	Akap11
OLIG	Jak2	0.860638	0.299	0.096	0.839988	0.207	0.086	5.03449e-221		Jak2	Cd63	Aagab	Arhgap20	Apod
OLIG	Nfix	0.747302	0.463	0.218	0.554455	0.283	0.193	2.72598e-220		Nfix	Kank1	Asap1	Fam184b
OLIG	Samd4	0.895903	0.373	0.152	0.682579	0.237	0.138	1.19251e-219		Samd4	Fam228b	Soga1	Tcf4
OLIG	Slk	0.816533	0.299	0.095	0.637028	0.17	0.072	2.79152e-219		Slk	Sesn3	Clta	Cp
OLIG	Cdc42se2	0.780377	0.397	0.167	0.673171	0.271	0.151	6.36158e-219		Cdc42se2	Gramd3	Zfp36l2	Slc24a5
OLIG	Atp11a	0.81538	0.369	0.143	0.902451	0.294	0.138	2.16473e-218		Atp11a	Arntl	Usp8	Gdap1
OLIG	Dbndd2	0.968365	0.187	0.026	1.06379	0.166	0.028	8.30444e-217		Dbndd2	Adgrl1	Tbc1d16	Lingo2
OLIG	Prkacb	0.811007	0.332	0.119	0.726601	0.224	0.105	1.46166e-216		Prkacb	Bhlhe40	Nek7	Slc4a10
OLIG	Rtkn	0.900115	0.233	0.053	1.04437	0.201	0.051	2.03177e-216		Rtkn	Mid1	Ctsb	Arl15
OLIG	Nkx6-2	0.870703	0.156	0.01	0.979692	0.146	0.013	5.013e-216		Nkx6-2	Npas3	Rnpep	Baiap2
OLIG	Dusp10	0.844395	0.174	0.02	0.706804	0.119	0.021	8.56083e-216		Dusp10	Ccdc88c	Arl15	Vegfa
OLIG	Ncoa3	0.797702	0.362	0.137	0.949863	0.285	0.125	3.02093e-215		Ncoa3	Rimklb	Dclre1c	Plxna3
OLIG	2010111I01Rik	0.79994	0.45	0.22	0.814201	0.318	0.189	2.45903e-214		2010111I01Rik	Enah	Sipa1l1	Gpt2
OLIG	Pde1c	0.924917	0.315	0.112	0.803338	0.223	0.108	3.46126e-213		Pde1c	Pou2f1	Man1a	Diablo
OLIG	Arid4b	0.723152	0.546	0.303	0.644715	0.377	0.262	7.14805e-212		Arid4b	4930402H24Rik	Swap70	Crmp1
OLIG	Cmtm5	0.664545	0.412	0.167	0.762119	0.299	0.178	7.52294e-212		Cmtm5	Eci2	Senp2	Pcdh11x
OLIG	Pdcd6ip	0.844532	0.313	0.107	0.986831	0.258	0.098	1.99867e-210		Pdcd6ip	Magi3	Rasgrp3	Anks1b
OLIG	Npat	0.836795	0.245	0.064	0.584571	0.141	0.057	1.52563e-209		Npat	Pde10a	Rptor	Adcyap1r1
OLIG	Dock3	0.771247	0.418	0.191	0.52398	0.238	0.16	1.72233e-208		Dock3	Cs	Eml4	Shank1
OLIG	Cntn3	1.09073	0.22	0.051	1.00358	0.17	0.041	5.78834e-208		Cntn3	Kifc3	Mgat1	Ust
OLIG	Dusp16	0.80069	0.26	0.074	0.594709	0.141	0.062	3.65068e-207		Dusp16	Adam23	Snx13	P3h3
OLIG	Map6d1	0.836263	0.156	0.013	0.942481	0.129	0.011	7.41498e-207		Map6d1	Fam184a	Extl3	Cpq
OLIG	Mettl7a1	0.877388	0.26	0.073	0.849044	0.181	0.074	3.03105e-206		Mettl7a1	Plce1	Erp29	Msra
OLIG	Gprc5b	0.731682	0.279	0.083	0.728626	0.201	0.093	7.29721e-206		Gprc5b	Nsdhl	Jak1	Klhl5
OLIG	Sec11c	0.767812	0.301	0.099	0.626563	0.208	0.098	1.90358e-204		Sec11c	Lrp1	Cltc	Slitrk5
OLIG	Ell2	0.789845	0.201	0.038	0.692743	0.136	0.035	5.41429e-204		Ell2	Zfp36l1	Tmcc3	Lrrtm3
OLIG	Tbcd	0.85838	0.261	0.079	0.50345	0.136	0.059	9.98021e-204		Tbcd	Eno1	Kdm7a	Basp1
OLIG	Epb41l4b	0.874027	0.242	0.066	0.825202	0.163	0.044	5.37105e-201		Epb41l4b	Wsb1	Large1	Adgra1
OLIG	Fth1	0.693599	0.608	0.344	0.950149	0.585	0.33	2.79387e-200		Fth1	Hlf	Rin2	Ccnd1
OLIG	Rasgrp3	0.604531	0.289	0.086	0.572217	0.156	0.045	1.47384e-199		Rasgrp3	Dock7	Bach1	Pcbp3
OLIG	Xkr4	0.806816	0.384	0.163	0.534278	0.188	0.093	1.68836e-199		Xkr4	Dtx3	Rab8b	Tmem108
OLIG	Igsf11	0.716057	0.273	0.081	0.538914	0.167	0.092	5.67413e-199		Igsf11	Abi1	Sf3b1	Dync1i1
OLIG	Itgb4	0.781672	0.146	0.011	0.838913	0.105	0.009	1.7143e-196		Itgb4	Chd9	Aftph	Dlgap4
OLIG	Map7d1	0.795649	0.244	0.066	0.830964	0.224	0.092	1.09967e-195		Map7d1	Slc41a1	Sec14l1	Snap91
OLIG	Cttnbp2	0.567913	0.579	0.312	0.624181	0.439	0.285	1.91645e-195		Cttnbp2	Tex9	Klf3	5330434G04Rik
OLIG	Actn4	0.732179	0.313	0.113	0.72426	0.207	0.104	3.18455e-194		Actn4	Rcn2	Diaph2	Ttc4
OLIG	Klf13	0.773194	0.244	0.067	0.59429	0.158	0.068	2.35292e-193		Klf13	Dag1	Cebpg	C530008M17Rik
OLIG	Cdk18	0.759296	0.138	0.008	0.897985	0.114	0.009	1.10761e-192		Cdk18	Ampd2	Ralgps2	Myef2
OLIG	Abca8b	0.826531	0.243	0.07	0.778176	0.168	0.06	2.67961e-191		Abca8b	Pantr1	Ptbp3	Madd
OLIG	Atp9a	0.724387	0.283	0.096	0.625433	0.165	0.07	4.94639e-190		Atp9a	Crtc3	Arpc2	Ripor2
OLIG	4931406P16Rik	0.715953	0.331	0.127	0.739302	0.239	0.117	6.97224e-190		4931406P16Rik	Slc25a3	Actr2	Lrrc4c
OLIG	Cacnb4	0.777039	0.343	0.148	1.22085	0.3	0.101	1.27387e-189		Cacnb4	Dnah7b	Hexa	Lmtk3
OLIG	Chn2	0.50888	0.331	0.122	0.994395	0.243	0.067	1.10212e-187		Chn2	Ap3m1	Tln1	Tnfrsf21
OLIG	Zfp704	0.751306	0.344	0.142	0.678348	0.2	0.1	1.32137e-187		Zfp704	Gm20515	Pan3	Tmem191c
OLIG	Paip2	0.68196	0.357	0.153	0.597051	0.228	0.131	1.08457e-185		Paip2	Ldhb	Arhgap12	Nfib
OLIG	Atp1b3	0.750209	0.27	0.088	0.772555	0.181	0.07	1.16519e-185		Atp1b3	Akr1b10	Chic2	Olig2
OLIG	Prkcq	0.73777	0.287	0.101	0.651237	0.173	0.058	1.6928e-184		Prkcq	Xpr1	Tsc22d4	Spats2l
OLIG	Evi2a	0.812839	0.202	0.044	1.0176	0.172	0.041	8.17135e-184		Evi2a	Psap	Irf2	Mro
OLIG	Fam126a	0.735387	0.252	0.077	0.529356	0.145	0.063	1.47435e-182		Fam126a	Epas1	Clint1	Fip1l1
OLIG	Fam53b	0.823996	0.222	0.056	0.878022	0.185	0.064	1.76202e-182		Fam53b	Leng8	Pld1	Sh3gl2
OLIG	Ptpn11	0.767353	0.238	0.069	0.706131	0.161	0.065	2.03427e-182		Ptpn11	Hacd3	Pkig	Slc22a17
OLIG	Reps2	0.736707	0.224	0.061	0.588821	0.139	0.045	4.5919e-182		Reps2	Alms1	Capzb	Dynlt1a
OLIG	Slc25a12	0.722627	0.343	0.148	0.586635	0.227	0.136	1.52957e-181		Slc25a12	Hmgcr	Ctsa	Macrod2
OLIG	Dennd5a	0.670786	0.411	0.198	0.594899	0.276	0.167	4.12623e-181		Dennd5a	Cspp1	Comt	Tmem181a
OLIG	Scd2	0.627386	0.646	0.388	0.799103	0.623	0.428	2.43628e-179		Scd2	Asph	Mtus1	Lrp8
OLIG	Thra	0.646769	0.41	0.192	0.734621	0.325	0.195	1.7351e-178		Thra	Swap70	Arpc4	Tmem63b
OLIG	Ptma	0.688049	0.448	0.219	1.02525	0.429	0.207	1.89786e-178		Ptma	Mcur1	Fkbp15	Kcnip4
OLIG	Jph4	0.80776	0.209	0.052	1.10522	0.193	0.05	3.58275e-178		Jph4	Pcgf5	Nos1ap	Rasgef1b
OLIG	Lap3	0.705887	0.236	0.066	0.72302	0.195	0.089	4.66588e-178		Lap3	Atp2b2	Nfya	Cep112
OLIG	Wdr20	0.723146	0.302	0.114	0.577393	0.187	0.104	7.85299e-178		Wdr20	Cnn3	Mgat5	Cask
OLIG	Prr18	0.836749	0.155	0.021	1.12058	0.191	0.037	1.08321e-177		Prr18	Pmm1	Ywhah	Plxna4
OLIG	Sv2a	0.761957	0.256	0.081	1.06497	0.225	0.068	1.68471e-176		Sv2a	Prnp	Ctc1	Sms
OLIG	Cpd	0.704176	0.287	0.105	0.527315	0.171	0.1	3.52388e-175		Cpd	Arl8a	Zcchc6	Tia1
OLIG	Fsd1l	0.735902	0.341	0.144	0.675213	0.261	0.141	3.82809e-175		Fsd1l	Ocrl	Rbm39	Cdc7
OLIG	Bpgm	0.75313	0.183	0.037	0.713785	0.131	0.041	3.63845e-174		Bpgm	Dkk3	Atxn7l1	Arhgef25
OLIG	Fbxo7	0.75477	0.275	0.099	0.623313	0.181	0.09	1.14938e-171		Fbxo7	Mocs2	Sfi1	Tmem163
OLIG	Akr1b3	0.924076	0.222	0.065	1.24021	0.242	0.068	7.53538e-171		Akr1b3	Tsc22d1	Zc3h7a	Eml5
OLIG	Tanc1	0.657487	0.321	0.131	0.595967	0.198	0.1	1.07344e-169		Tanc1	Slc38a1	Dhx9	Unc13b
OLIG	Sccpdh	0.718567	0.201	0.049	0.857014	0.188	0.067	1.12533e-169		Sccpdh	Col11a2	Parp8	Ptpn4
OLIG	Clasrp	0.7083	0.315	0.125	0.686422	0.246	0.129	1.23898e-168		Clasrp	Tpcn1	Wdr44	Fhit
OLIG	Rnf141	0.659955	0.244	0.078	0.731581	0.159	0.065	3.20028e-165		Rnf141	Map2	Adam17	Ube3a
OLIG	Endod1	0.699226	0.17	0.033	0.59907	0.1	0.026	4.51369e-165		Endod1	Dhtkd1	Lims1	Sptan1
OLIG	Efcab14	0.700368	0.314	0.128	0.840387	0.237	0.11	9.49927e-165		Efcab14	Phyhipl	Grb2	Pcmtd2
OLIG	Usp25	0.69248	0.285	0.109	0.570929	0.184	0.094	1.01931e-164		Usp25	Idh3b	Pts	Camk2b
OLIG	Plekhb1	0.7185	0.194	0.047	0.881467	0.171	0.051	2.01523e-164		Plekhb1	Klhl5	Ptp4a2	Nin
OLIG	Map1a	0.773086	0.239	0.075	0.83787	0.18	0.066	4.69163e-164		Map1a	Kidins220	Sbno2	Sulf2
OLIG	Csf1	0.724772	0.178	0.037	0.751092	0.127	0.04	1.28794e-163		Csf1	Eif5	Gramd1a	March1
OLIG	Serinc5	0.68482	0.31	0.128	0.692699	0.216	0.09	3.58578e-161		Serinc5	Fbxo44	Arid1a	Prune2
OLIG	Lta4h	0.667006	0.214	0.06	0.725288	0.154	0.059	1.17868e-159		Lta4h	Mfn1	Agmo	Tnpo1
OLIG	Syt11	0.618365	0.541	0.316	0.509317	0.429	0.322	5.07454e-159		Syt11	Smox	Wsb1	Dapk1
OLIG	B3galt5	0.737338	0.167	0.034	0.791294	0.152	0.034	1.23158e-158		B3galt5	Sorl1	Acsl4	Prkcb
OLIG	Cd82	0.573027	0.15	0.024	0.600194	0.104	0.021	3.62111e-157		Cd82	Klf9	Snx6	Efs
OLIG	Osbpl7	0.710568	0.182	0.043	0.626212	0.124	0.04	5.99984e-157		Osbpl7	Cyp2j6	Sfmbt1	Helz
OLIG	Retreg3	0.64799	0.212	0.062	0.540875	0.126	0.053	1.05406e-156		Retreg3	Zfp516	Man1a2	Rbfox2
OLIG	Gm45345	0.645534	0.122	0.011	0.864552	0.117	0.012	8.04996e-155		Gm45345	Peg3	Bhlhe41	Dlg4
OLIG	Srpk3	0.729508	0.193	0.051	1.04136	0.203	0.053	5.83926e-153		Srpk3	B3galt2	Arhgef1	Ftx
OLIG	Cdkl5	0.688423	0.232	0.078	0.500181	0.139	0.058	2.56476e-152		Cdkl5	Crot	Ccni	Sestd1
OLIG	Bcar1	0.723735	0.18	0.043	0.888227	0.158	0.05	2.63389e-152		Bcar1	Fibp	Eif4a2	Thsd7a
OLIG	Frmd8	0.642102	0.163	0.034	0.638139	0.12	0.033	3.16032e-151		Frmd8	Pitpnm2	Clip1	Tmem132b
OLIG	Galnt7	0.736584	0.252	0.092	0.929402	0.211	0.066	1.67719e-149		Galnt7	Atp2a2	Htra2	Ablim1
OLIG	Mfsd6	0.669117	0.211	0.065	0.623735	0.137	0.054	8.70055e-149		Mfsd6	Hdhd5	Stk4	Emx2os
OLIG	Iars	0.659522	0.246	0.089	0.720063	0.184	0.078	1.81735e-147		Iars	Zfp36l2	Gfm2	Rpl13
OLIG	Ssfa2	0.692831	0.272	0.108	0.654025	0.205	0.107	2.29906e-147		Ssfa2	Cd81	Zmiz1	Map1b
OLIG	Fgf1	0.643363	0.182	0.048	0.567736	0.126	0.063	5.09636e-146		Fgf1	Cc2d2a	Slc9a9	Wnk3
OLIG	Zfp101	0.758186	0.198	0.057	0.947499	0.159	0.045	2.45079e-145		Zfp101	Kcnk2	Dgkd	Ccdc148
OLIG	Bicd2	0.70612	0.219	0.071	0.880383	0.186	0.068	1.80573e-144		Bicd2	Spag9	Naa35	Ptprn
OLIG	Taldo1	0.637365	0.196	0.056	0.582175	0.133	0.044	3.18101e-144		Taldo1	Aldh1a1	Osbpl11	Slitrk2
OLIG	Gm4221	0.821021	0.177	0.047	0.927398	0.146	0.048	3.45659e-144		Gm4221	Add3	Helz	Casc4
OLIG	Prkd3	0.630188	0.309	0.135	0.535045	0.232	0.132	3.87518e-144		Prkd3	Clasp1	Zufsp	Robo1
OLIG	Spg20	0.670033	0.178	0.045	0.872168	0.144	0.045	1.23313e-143		Spg20	Amer2	Kdm3b	Nlgn1
OLIG	Rdx	0.6461	0.268	0.108	0.666279	0.216	0.109	3.53604e-141		Rdx	Chpt1	Hnrnph1	Agpat5
OLIG	Tpd52	0.558424	0.215	0.069	0.515766	0.133	0.051	9.57247e-140		Tpd52	Bmyc	Atp6v0a1	Tmco3
OLIG	Cyp27a1	0.630928	0.149	0.03	0.611117	0.118	0.027	1.66992e-139		Cyp27a1	Dlg4	Fcho2	Satb1
OLIG	Dync1li2	0.601381	0.402	0.21	0.586729	0.295	0.186	3.33829e-139		Dync1li2	Ldlr	Agps	Jam2
OLIG	Kif3a	0.566011	0.381	0.192	0.516826	0.258	0.176	1.99284e-138		Kif3a	P3h3	Peli1	Dcc
OLIG	Prag1	0.637619	0.205	0.066	0.727934	0.159	0.043	2.40322e-137		Prag1	Mrps5	Mtdh	Csmd3
OLIG	Sorbs3	0.592398	0.172	0.044	0.553547	0.123	0.054	6.87282e-136		Sorbs3	Chka	Gnai2	Acap3
OLIG	Crybg3	0.632472	0.167	0.041	0.545486	0.107	0.033	7.16518e-136		Crybg3	Bbof1	Tmem55b	Cfap20
OLIG	Tspan15	0.568618	0.168	0.043	0.691565	0.132	0.049	2.71626e-132		Tspan15	Ift81	AY036118	1700025G04Rik
OLIG	Acsl1	0.560874	0.186	0.055	0.602819	0.13	0.041	1.07232e-131		Acsl1	2810403A07Rik	Ulk2	Slc4a3
OLIG	Slc6a9	0.63182	0.179	0.051	0.612752	0.119	0.046	1.96707e-131		Slc6a9	Them4	Cep68	Atxn1
OLIG	Myo9a	0.557389	0.494	0.299	0.552906	0.342	0.255	5.84004e-131		Myo9a		3222401L13Rik	Pak3
OLIG	Wdr91	0.562781	0.172	0.046	0.527494	0.111	0.043	1.38817e-130		Wdr91		Pabpc1	Cpt1c
OLIG	Add1	0.622146	0.417	0.234	0.514636	0.306	0.228	2.11268e-130		Add1		Tns3	Fbxl2
OLIG	Fah	0.549692	0.138	0.027	0.660108	0.141	0.05	3.01658e-129		Fah		Psap	Rin2
OLIG	Dopey2	0.539437	0.285	0.125	0.676992	0.281	0.176	1.7286e-126		Dopey2		Dnajc7	Ppm1l
OLIG	Ptpdc1	0.615673	0.202	0.068	0.679083	0.153	0.058	7.26166e-126		Ptpdc1		Dnm2	Pcdh10
OLIG	Sox2	0.662005	0.263	0.109	0.835204	0.208	0.104	1.59339e-125		Sox2		Map3k3	Maged1
OLIG	Hook3	0.51115	0.586	0.378	0.586526	0.453	0.349	1.91401e-125		Hook3		Elf1	A230057D06Rik
OLIG	D1Ertd622e	0.597463	0.207	0.071	0.584309	0.146	0.068	3.07503e-123		D1Ertd622e		Ddi2	Dmxl2
OLIG	Myo18a	0.540305	0.359	0.187	0.517514	0.229	0.169	4.02486e-120		Myo18a		Cdk9	Grik5
OLIG	Agtpbp1	0.539247	0.292	0.136	0.581657	0.222	0.126	1.2671e-118		Agtpbp1		Tmem135	Ric3
OLIG	Rassf2	0.505925	0.28	0.124	0.605315	0.177	0.086	1.09293e-117		Rassf2		Cdc42	AC154782.1
OLIG	Cdk5	0.595676	0.222	0.084	0.898971	0.239	0.093	1.52063e-117		Cdk5		2810474O19Rik	Fndc3b
OLIG	Mpzl1	0.522784	0.28	0.129	0.548467	0.215	0.129	4.71583e-117		Mpzl1		Rnf169	Slc6a1
OLIG	Trim13	0.577072	0.104	0.014	0.72047	0.102	0.016	5.71562e-115		Trim13		Celf1	Xkr6
OLIG	Mapk8ip1	0.556936	0.219	0.084	0.825399	0.224	0.104	8.99131e-115		Mapk8ip1		Slc12a6	Nr2f2
OLIG	Polr3e	0.707003	0.166	0.051	0.765153	0.132	0.042	3.80448e-114		Polr3e		Fgd4	B3gat1
OLIG	Lig3	0.65731	0.226	0.09	0.941251	0.199	0.079	1.14656e-113		Lig3		Zfp715	Xpr1
OLIG	Lrrc8d	0.545129	0.278	0.132	0.506699	0.173	0.088	8.24729e-113		Lrrc8d		Calm2	Tenm4
OLIG	Gnptab	0.550408	0.199	0.073	0.552091	0.139	0.056	1.22338e-112		Gnptab		Atp6v0a2	Fubp1
OLIG	Hdac11	0.541937	0.174	0.056	0.741054	0.145	0.058	1.97907e-111		Hdac11		Epb41	Gm47423
OLIG	Mapkap1	0.564988	0.301	0.154	0.50933	0.184	0.124	3.76262e-110		Mapkap1		Madd	Hdgfl3
OLIG	Trappc10	0.525775	0.199	0.075	0.543585	0.173	0.092	8.07387e-107		Trappc10		Washc4	Ate1
OLIG	Dcaf17	0.66996	0.308	0.167	1.04637	0.278	0.135	2.99606e-102		Dcaf17		Rnf216	Gm9801
OLIG	Shisa4	0.566377	0.336	0.177	0.754667	0.336	0.198	1.18087e-101		Shisa4		Chd2	Kat6b
OLIG	Cercam	0.564095	0.109	0.024	0.820523	0.111	0.025	3.08939e-95		Cercam		Rpl10a	Syn3
OLIG	Prrt1	0.503624	0.224	0.098	0.69478	0.198	0.097	1.84257e-94		Prrt1		Gm32036	Mllt3
OLIG	Xpo6	0.524032	0.257	0.128	0.672627	0.22	0.128	5.4146e-92		Xpo6		Sh3glb1	Myo5a
OLIG	Psat1	0.504203	0.173	0.065	0.558933	0.138	0.074	3.17274e-90		Psat1		Cerk	Olig1
OLIG	Cab39l	0.55674	0.204	0.092	0.66321	0.149	0.068	1.38246e-87		Cab39l		Fam117b	Srgap3
OLIG	Dusp15	0.564832	0.177	0.08	0.577577	0.207	0.117	8.60992e-71		Dusp15		Ppp1r9a	Nalcn
ASTR	Rgs20	2.24337	0.291	0.034	2.65137	0.417	0.029	0				Tgs1	Mapk7
ASTR	Adhfe1	1.11121	0.168	0.016	1.14805	0.214	0.012	0				Zfp36l1	Etv1
ASTR	Prex2	3.06462	0.559	0.017	3.0555	0.58	0.018	0				Stau1	Evi5l
ASTR	Paqr8	1.56925	0.319	0.072	1.4083	0.312	0.042	0				Srsf5	Stxbp1
ASTR	Adgrb3	1.18722	0.436	0.252	2.0035	0.542	0.187	0				Uvrag	Csnk2a2
ASTR	Arhgef4	1.54761	0.261	0.029	1.49934	0.326	0.033	0				Btbd9	Ralgapa2
ASTR	Gm10561	1.28882	0.164	0.008	1.28498	0.213	0.011	0				Taok3	Mapk8
ASTR	Gm973	1.16728	0.151	0.002	1.29775	0.226	0.002	0				Zbtb18	Mtss1
ASTR	Plcd4	2.02317	0.331	0.009	2.01278	0.384	0.012	0				P4ha1	Cobl
ASTR	Acsl3	2.32425	0.635	0.176	1.84347	0.623	0.165	0				Snrk	Clasp1
ASTR	Ngef	0.943827	0.133	0.006	1.26669	0.246	0.008	0				Arid4a	Kbtbd11
ASTR	Bcl2	1.75589	0.316	0.035	2.09019	0.438	0.027	0				Sec61g	Ccser2
ASTR	Gli2	0.782695	0.118	0.006	0.962961	0.194	0.004	0				Strada	Ncoa7
ASTR	Gpr37l1	1.57753	0.324	0.053	1.26751	0.335	0.058	0				Med13l	Stmn2
ASTR	Soat1	1.40411	0.273	0.055	1.43475	0.342	0.051	0				Dennd1b	E130307A14Rik
ASTR	Prdx6	2.74585	0.609	0.073	2.2409	0.547	0.064	0				Mafg	Usp3
ASTR	Pbx1	1.52285	0.487	0.234	1.92625	0.549	0.17	0				Lgals8	Rspry1
ASTR	Ccdc190	0.795956	0.105	0.002	0.8873	0.142	0.002	0				Fgfr1op	Srek1
ASTR	Atp1a2	3.09961	0.865	0.147	2.80829	0.903	0.172	0				Csf2ra	C2cd5
ASTR	Fmn2	1.49604	0.296	0.088	1.7364	0.394	0.076	0				Mfap3	Akt3
ASTR	Slc30a10	1.105	0.155	0.011	1.04408	0.184	0.009	0				Malt1	2410089E03Rik
ASTR	Slc39a12	1.79333	0.281	0.008	2.05426	0.412	0.011	0				Usf2	Ctnna2
ASTR	Nebl	1.57989	0.298	0.056	1.91625	0.416	0.054	0				Pten	Clstn1
ASTR	Entpd2	1.17991	0.153	0.003	1.25495	0.195	0.007	0				Pip4k2a	Trp53bp1
ASTR	Itga6	0.966492	0.198	0.039	1.06592	0.284	0.036	0				Dpy19l4	Kif5c
ASTR	Ccdc141	1.54835	0.255	0.015	1.71689	0.341	0.015	0				Cln3	AU041133
ASTR	Slc1a2	4.57637	0.954	0.173	4.04951	0.976	0.199	0				Actb	Srpk1
ASTR	Pax6	2.05659	0.317	0.01	1.80921	0.322	0.011	0				Ep300	Phf14
ASTR	Mertk	1.35386	0.453	0.091	1.48931	0.48	0.067	0				Srrm2	Prpf4b
ASTR	Slc20a1	1.67942	0.26	0.032	1.46055	0.284	0.033	0				Prkcb	Bex3
ASTR	Cst3	2.2067	0.895	0.443	1.27226	0.843	0.41	0				Nmt1	Tnk2
ASTR	Acss1	1.10724	0.223	0.059	1.28793	0.313	0.044	0				Ccdc12	Strbp
ASTR	Pygb	1.10058	0.196	0.041	1.23197	0.286	0.033	0				Tbk1	Aak1
ASTR	Ptprt	0.847278	0.198	0.07	1.73771	0.331	0.051	0				Rps9	Tcaf1
ASTR	Sdc4	1.60841	0.234	0.009	1.13206	0.184	0.008	0				Rac1	Dzip3
ASTR	Tspan7	2.08567	0.512	0.182	2.40325	0.593	0.139	0				Gcn1l1	Gprasp1
ASTR	Tmem47	1.84268	0.325	0.024	1.74385	0.367	0.028	0				Atp6v0b	Hnrnpr
ASTR	Dmd	1.34449	0.544	0.228	1.53583	0.614	0.188	0				Nfxl1	Spata7
ASTR	Gdpd2	1.34813	0.173	0.006	1.61506	0.268	0.01	0				Rapgef6	Tle2
ASTR	Phka1	1.45842	0.338	0.124	1.41813	0.38	0.085	0				Kdm2b	Mdga2
ASTR	Sat1	2.98152	0.766	0.134	2.52626	0.806	0.161	0				Ldb1	Galnt1
ASTR	Mir124-2hg	1.33737	0.196	0.014	1.31188	0.223	0.015	0				B430010I23Rik	Zfp612
ASTR	Tnik	1.57387	0.535	0.237	1.65568	0.571	0.183	0				Smg1	Pabpn1
ASTR	Slc7a11	1.98801	0.442	0.023	2.55141	0.552	0.023	0				Camta2	Plekha5
ASTR	Lhfp	1.36736	0.211	0.016	1.30629	0.237	0.012	0				Lyst	Nsd2
ASTR	Dclk1	4.1172	0.934	0.206	3.58077	0.945	0.195	0				Hsp90b1	Tmx4
ASTR	Arhgef26	2.06562	0.389	0.034	2.08657	0.446	0.028	0				Mapre1	Hip1
ASTR	Gria2	2.39543	0.848	0.299	1.97052	0.889	0.318	0				Pla2g4a	Grid2
ASTR	Bcan	2.332	0.703	0.127	1.83714	0.745	0.158	0				Tpp2	Rufy3
ASTR	Gm3764	3.08804	0.848	0.141	2.9473	0.897	0.166	0				Akap8l
ASTR	Sema4a	1.05973	0.151	0.008	1.1857	0.207	0.006	0				Phf14
ASTR	Pbxip1	2.03306	0.347	0.026	1.67698	0.333	0.022	0				Ifnar1
ASTR	Notch2	1.09797	0.205	0.046	1.25601	0.262	0.031	0				Gna13
ASTR	S1pr1	2.30113	0.424	0.021	2.04261	0.454	0.029	0				Slc8a1
ASTR	F3	2.19865	0.432	0.04	1.979	0.458	0.042	0				Dlgap4
ASTR	Bmpr1b	1.7539	0.24	0.004	2.04155	0.363	0.007	0				Atp2b1
ASTR	St6galnac5	1.32431	0.185	0.018	1.57216	0.284	0.019	0				Ubl3
ASTR	Fut9	1.80714	0.415	0.091	1.87161	0.506	0.081	0				Cep192
ASTR	Tnc	1.08652	0.131	0.018	1.43296	0.198	0.009	0				Zrsr2
ASTR	Gm11266	1.15728	0.19	0.025	1.16527	0.243	0.025	0				Fbxw4
ASTR	Dab1	0.912705	0.292	0.115	1.26151	0.385	0.091	0				Acp2
ASTR	Plpp3	2.65137	0.678	0.154	2.5236	0.731	0.145	0				Rab14
ASTR	Macf1	1.16798	0.8	0.626	1.38961	0.839	0.477	0				Mkln1
ASTR	Id3	1.81752	0.242	0.025	1.74977	0.262	0.026	0				Tet3
ASTR	Arhgef19	1.0693	0.162	0.026	1.13409	0.213	0.018	0				Adam15
ASTR	Prdm16	1.26847	0.174	0.002	1.50452	0.278	0.003	0				Tmem87b
ASTR	Hes5	1.43412	0.201	0.019	1.46453	0.305	0.046	0				Dctn5
ASTR	Fgfr3	2.54726	0.465	0.015	2.3798	0.521	0.025	0				Sgk1
ASTR	Sorcs2	1.08487	0.165	0.012	1.42099	0.279	0.012	0				Ccnl1
ASTR	Ppargc1a	1.36482	0.223	0.022	1.45134	0.276	0.02	0				Rhoa
ASTR	C030018K13Rik	1.21239	0.161	0.001	1.29502	0.219	0.001	0				Nisch
ASTR	Gabra2	1.17427	0.197	0.037	1.21373	0.27	0.034	0				Irf2bp2
ASTR	Gabrb1	3.31001	0.621	0.063	3.4827	0.644	0.06	0				Bmyc
ASTR	Slc4a4	2.88976	0.516	0.042	3.00305	0.614	0.053	0				Msl1
ASTR	Sparcl1	2.72767	0.683	0.111	2.29961	0.737	0.133	0				Fau
ASTR	Grk3	1.98106	0.367	0.038	1.91755	0.442	0.039	0				Stard9
ASTR	Msi1	1.07044	0.158	0.017	1.12198	0.215	0.019	0				Tbc1d14
ASTR	Phkg1	3.22006	0.625	0.022	2.95072	0.61	0.019	0				Tpcn1
ASTR	Ttyh3	1.2101	0.193	0.024	1.29982	0.279	0.03	0				Irak1
ASTR	Mmd2	1.99717	0.411	0.054	1.85893	0.482	0.052	0				Mlxip
ASTR	Ptprz1	2.03953	0.843	0.19	1.74889	0.876	0.219	0				Foxp1
ASTR	Eva1a	0.973272	0.135	0.008	0.902672	0.163	0.006	0				Tyk2
ASTR	Sfxn5	2.59276	0.523	0.051	2.71548	0.581	0.036	0				Sppl2a
ASTR	Tprkb	1.75178	0.406	0.11	1.53239	0.432	0.095	0				Ufsp2
ASTR	Mgll	1.57309	0.305	0.072	1.55611	0.36	0.052	0				Gtpbp2
ASTR	Aldh1l1	0.807593	0.112	0.01	0.964945	0.167	0.004	0				Rsbn1l
ASTR	Adamts9	1.41814	0.189	0.016	1.30143	0.221	0.014	0				Ranbp10
ASTR	Lrig1	1.00972	0.151	0.021	1.27767	0.251	0.025	0				Gnaq
ASTR	Slc6a11	1.30759	0.205	0.014	1.56425	0.306	0.018	0				Setd2
ASTR	Slc6a1	1.44978	0.508	0.198	1.40153	0.563	0.166	0				Hnrnpul1
ASTR	Slc25a18	0.741549	0.107	0.01	1.04359	0.211	0.009	0				Actr3
ASTR	Grin2b	0.975111	0.209	0.054	1.30199	0.354	0.051	0				Wdr26
ASTR	Slco1c1	2.86917	0.534	0.015	2.64813	0.544	0.016	0				Gmpr2
ASTR	Gm44257	0.943408	0.131	0.011	1.17963	0.206	0.015	0				Exoc6
ASTR	9430041J12Rik	1.4687	0.205	0.006	1.46111	0.256	0.007	0				Cntrl
ASTR	Ttyh1	2.93191	0.768	0.13	2.48577	0.796	0.137	0				Ddx6
ASTR	Apoe	2.63338	0.92	0.456	1.87959	0.941	0.499	0				Trim26
ASTR	Fxyd1	1.31	0.18	0.011	1.16449	0.198	0.014	0				Itm2b
ASTR	Lgi4	1.55174	0.213	0.008	1.33815	0.221	0.008	0				Ppt1
ASTR	Slc7a10	1.94849	0.341	0.024	1.78532	0.378	0.031	0				Zbtb4
ASTR	Mfge8	1.96728	0.353	0.033	1.64444	0.352	0.034	0				Tardbp
ASTR	Mical2	1.92233	0.358	0.034	1.51118	0.366	0.046	0				Abi1
ASTR	Htra1	1.86568	0.403	0.074	1.64858	0.426	0.072	0				Hnrnpa3
ASTR	Syne1	2.02031	0.69	0.297	1.74014	0.673	0.234	0				Cnot2
ASTR	Nhsl1	1.27155	0.214	0.049	1.72168	0.326	0.045	0				Vps13c
ASTR	Ddo	1.55517	0.196	0.004	1.58304	0.249	0.004	0				Supt20
ASTR	Gja1	3.00885	0.639	0.039	2.6205	0.629	0.051	0				Hltf
ASTR	Fabp7	0.878405	0.137	0.031	1.36547	0.299	0.046	0				Capza1
ASTR	Appl2	1.87086	0.672	0.297	2.07319	0.776	0.233	0				Arpc3
ASTR	Rfx4	1.98378	0.334	0.026	2.03132	0.428	0.027	0				Pak2
ASTR	Rmst	2.97978	0.506	0.009	2.27011	0.402	0.01	0				Wdfy2
ASTR	Fgd6	1.51462	0.295	0.057	1.47575	0.354	0.044	0				Nsd1
ASTR	Fgfr1	1.90804	0.394	0.046	1.73594	0.42	0.041	0				Dip2b
ASTR	Slc7a2	1.17854	0.182	0.019	1.15289	0.224	0.017	0				Smchd1
ASTR	Tenm3	1.53402	0.207	0.021	2.04222	0.33	0.02	0				Rnf111
ASTR	Gpm6a	1.69004	0.484	0.147	1.59585	0.568	0.156	0				Tor1aip1
ASTR	Palld	1.08093	0.16	0.01	1.30594	0.235	0.01	0				Rpl21
ASTR	Cpe	2.06411	0.501	0.126	1.83371	0.552	0.127	0				Tbc1d23
ASTR	Csgalnact1	1.55686	0.285	0.044	1.8034	0.397	0.037	0				Stx7
ASTR	Ncan	1.14285	0.198	0.039	1.38744	0.303	0.046	0				Rsrc2
ASTR	Slc27a1	2.04637	0.507	0.115	1.86121	0.51	0.07	0				Arhgap39
ASTR	Nwd1	2.85248	0.541	0.011	2.69887	0.566	0.012	0				Brd7
ASTR	Mt3	1.74569	0.425	0.089	1.55711	0.47	0.082	0				Rnf167
ASTR	Mt2	1.50933	0.227	0.022	1.26406	0.241	0.024	0				Bnip2
ASTR	Mt1	2.0046	0.498	0.118	1.76338	0.505	0.103	0				Dido1
ASTR	Fam107a	1.85265	0.266	0.007	1.29194	0.203	0.006	0				Slf2
ASTR	Camk2g	1.82786	0.384	0.081	1.83225	0.428	0.067	0				Tab2
ASTR	Vcl	1.88117	0.348	0.043	1.76512	0.379	0.032	0				Wdfy3
ASTR	Itih3	1.53084	0.229	0.018	1.95256	0.364	0.017	0				Rpl10
ASTR	Glud1	1.16652	0.265	0.088	1.51366	0.373	0.068	0				Sdccag8
ASTR	Ddhd1	1.50454	0.488	0.221	1.70918	0.612	0.177	0				Zfx
ASTR	Ndrg2	2.74995	0.656	0.083	2.5483	0.691	0.094	0				Hdlbp
ASTR	Gjb6	1.81016	0.309	0.016	1.57513	0.28	0.012	0				Mvb12b
ASTR	Clu	2.66491	0.641	0.098	2.01085	0.603	0.107	0				Xiap
ASTR	Gpc5	2.27489	0.428	0.098	3.46211	0.527	0.084	0				Slmap
ASTR	Gpc6	0.869119	0.229	0.08	1.65228	0.371	0.062	0				P2rx4
ASTR	Cldn10	1.55613	0.267	0.025	1.40541	0.294	0.03	0				Fndc3a
ASTR	Farp1	1.86316	0.343	0.086	2.26946	0.428	0.06	0				Prpf38b
ASTR	Clybl	0.530447	0.106	0.026	1.07148	0.24	0.022	0				Creb1
ASTR	AC154683.1	0.887367	0.135	0.012	1.12833	0.226	0.012	0				Ube2d3
ASTR	Ntm	2.95219	0.871	0.162	3.08443	0.883	0.169	0				Khdrbs1
ASTR	2900052N01Rik	1.70977	0.212	0.003	2.11299	0.323	0.005	0				Eif3a
ASTR	Acsbg1	1.48537	0.23	0.007	1.62494	0.309	0.01	0				Tmf1
ASTR	Igdcc4	1.47237	0.233	0.025	1.31233	0.261	0.026	0				Mia2
ASTR	Scg3	1.72337	0.352	0.063	1.56016	0.409	0.057	0				Snx2
ASTR	Hmgn3	1.42175	0.336	0.113	1.37233	0.443	0.114	0				Ssbp1
ASTR	Slc38a3	1.29764	0.214	0.029	1.36377	0.297	0.031	0				Dmtf1
ASTR	Cspg5	2.06571	0.697	0.143	1.74581	0.759	0.163	0				Zfp292
ASTR	Egfr	1.30623	0.187	0.007	1.48507	0.266	0.008	0				Ncbp3
ASTR	Cpeb4	1.32227	0.445	0.233	1.47784	0.54	0.172	0				Tra2b
ASTR	Wwc1	0.872997	0.13	0.021	1.07332	0.219	0.016	0				Dpp8
ASTR	Acsl6	1.97766	0.364	0.027	1.98215	0.437	0.028	0				Slc38a9
ASTR	Atp1b2	2.0824	0.394	0.029	1.80949	0.409	0.038	0				Ikbkb
ASTR	Abr	1.29898	0.268	0.063	1.2956	0.34	0.056	0				Fbxl20
ASTR	Aldoc	1.91776	0.375	0.047	1.49657	0.373	0.051	0				0610037L13Rik
ASTR	Msi2	2.20671	0.776	0.313	2.29463	0.777	0.229	0				Tpp1
ASTR	Gfap	1.93751	0.239	0.014	1.65452	0.202	0.01	0				Npc2
ASTR	Pitpnc1	1.9605	0.44	0.099	2.32731	0.505	0.067	0				Synj1
ASTR	Gm11713	1.41353	0.212	0.021	1.2132	0.238	0.022	0				Nars
ASTR	Fam20a	1.14327	0.166	0.007	1.21785	0.232	0.008	0				Rhob
ASTR	Sox9	2.16753	0.34	0.01	1.72026	0.292	0.011	0				Ubap2l
ASTR	Grin2c	1.94055	0.297	0.004	1.72895	0.31	0.005	0				Selenop
ASTR	Gli3	1.31282	0.185	0.005	1.78024	0.304	0.005	0				Rpl8
ASTR	Carmil1	1.06929	0.205	0.046	1.2662	0.288	0.037	0				6030458C11Rik
ASTR	Id4	1.97285	0.3	0.015	1.66082	0.284	0.016	0				Atpif1
ASTR	Shc3	1.23784	0.226	0.042	1.51389	0.337	0.035	0				Eef2
ASTR	Cxcl14	1.18559	0.154	0.008	1.10625	0.198	0.009	0				Top1
ASTR	Ntrk2	2.40846	0.681	0.136	1.95873	0.712	0.153	0				Rpl18a
ASTR	Adcy2	0.828035	0.121	0.027	1.20612	0.232	0.02	0				Safb2
ASTR	Nr2f1	1.67873	0.294	0.038	1.60798	0.388	0.047	0				Syncrip
ASTR	C130071C03Rik	1.30209	0.454	0.225	1.50055	0.586	0.198	0				Rpl6
ASTR	Nim1k	1.56593	0.264	0.03	1.77314	0.362	0.028	0				Rps8
ASTR	Ntsr2	3.16111	0.648	0.024	3.0397	0.714	0.034	0				Zfp106
ASTR	Id2	1.53676	0.263	0.037	1.45639	0.289	0.035	0				Spopl
ASTR	Dgkb	1.96823	0.349	0.066	2.49908	0.47	0.054	0				Rpl19
ASTR	Nrcam	1.90091	0.487	0.099	2.12445	0.594	0.093	0				Ddx3y
ASTR	Trim9	2.72306	0.537	0.044	2.68112	0.601	0.049	0				Rpl23
ASTR	Slc1a3	2.62755	0.873	0.297	1.78561	0.878	0.256	0				Rps11
ASTR	Myo10	1.57508	0.32	0.048	1.61327	0.385	0.044	0				1700020I14Rik
ASTR	Ctnnd2	1.32799	0.408	0.235	2.33721	0.533	0.166	0				Eef1a1
ASTR	Trps1	1.25252	0.496	0.306	1.67939	0.567	0.202	0				Rps3a1
ASTR	Cyp2d22	1.96792	0.341	0.029	1.61083	0.337	0.036	0				Tnpo3
ASTR	Mlc1	1.30319	0.189	0.009	1.29937	0.224	0.013	0				Rpl18
ASTR	Dbx2	1.11608	0.156	0.01	1.22872	0.236	0.01	0				Rpl13
ASTR	Fgd4	1.23873	0.28	0.083	1.30549	0.339	0.054	0
ASTR	Aifm3	1.45093	0.213	0.008	1.48366	0.256	0.008	0
ASTR	Prodh	1.51173	0.215	0.018	1.14763	0.202	0.013	0
ASTR	Atp13a4	2.28454	0.373	0.007	2.46698	0.482	0.012	0
ASTR	Kalrn	0.792928	0.183	0.063	1.24067	0.302	0.045	0
ASTR	Slc15a2	1.64164	0.34	0.045	1.57104	0.359	0.056	0
ASTR	Lsamp	1.40542	0.73	0.375	2.22688	0.738	0.305	0
ASTR	Zbtb20	1.04369	0.879	0.706	1.30454	0.873	0.528	0
ASTR	Tagln3	1.4704	0.242	0.034	1.54572	0.342	0.039	0
ASTR	Son	1.57694	0.979	0.86	1.16737	0.997	0.956	0
ASTR	Tiam2	0.731743	0.123	0.022	1.35915	0.293	0.027	0
ASTR	Lix1	1.19776	0.169	0.008	1.29403	0.24	0.009	0
ASTR	Cbs	1.98935	0.32	0.006	1.89438	0.36	0.006	0
ASTR	Cyp4f15	1.07694	0.129	0.001	0.896177	0.159	0.002	0
ASTR	Ptchd4	1.03108	0.152	0.015	1.27304	0.238	0.019	0
ASTR	Pla2g7	2.48378	0.512	0.039	2.17051	0.499	0.042	0
ASTR	Vegfa	2.05716	0.497	0.096	2.12258	0.65	0.119	0
ASTR	Dlgap1	1.1604	0.439	0.134	1.35846	0.51	0.124	0
ASTR	Atl2	1.3372	0.261	0.066	1.40566	0.336	0.051	0
ASTR	Nrxn1	2.14946	0.923	0.309	2.08321	0.946	0.316	0
ASTR	Aqp4	2.28911	0.375	0.014	2.06561	0.376	0.019	0
ASTR	Dtna	2.14637	0.807	0.396	2.30829	0.795	0.264	0
ASTR	Psd2	1.24629	0.211	0.029	1.42693	0.294	0.028	0
ASTR	Mcc	1.02098	0.171	0.023	1.38392	0.272	0.018	0
ASTR	Kcnn2	2.16946	0.4	0.04	1.83912	0.371	0.029	0
ASTR	Pdgfrb	1.31303	0.238	0.016	1.16949	0.256	0.015	0
ASTR	Mapk4	1.14699	0.173	0.017	1.11223	0.217	0.015	0
ASTR	Gm9925	2.48058	0.38	0.003	1.97999	0.295	0.003	0
ASTR	Tle4	1.37617	0.412	0.167	1.3517	0.526	0.154	0
ASTR	Rorb	3.43546	0.672	0.04	3.39517	0.72	0.039	0
ASTR	Trpm3	1.65931	0.193	0.046	2.28712	0.301	0.031	0
ASTR	Glis3	0.935756	0.134	0.013	1.36541	0.258	0.008	0
ASTR	Gldc	1.0169	0.152	0.009	1.17891	0.229	0.009	0
ASTR	Lgi1	1.79843	0.292	0.03	1.55571	0.307	0.026	0
ASTR	Sorbs1	1.69823	0.459	0.174	1.62677	0.48	0.12	0
ASTR	Gm47423	1.60778	0.24	0.027	1.369	0.273	0.04	0
ASTR	Ahcyl1	1.69457	0.455	0.153	1.28505	0.455	0.135	0
ASTR	Emp2	1.27452	0.155	0.008	1.1301	0.155	0.008	0
ASTR	Fezf2	1.39021	0.158	0.004	0.966457	0.134	0.004	0
ASTR	Pou3f2	1.28022	0.178	0.014	0.973452	0.173	0.016	0
ASTR	Dio2	1.28779	0.169	0.008	0.967755	0.141	0.008	0
ASTR	A330093E20Rik	0.990697	0.113	0.003	0.845891	0.115	0.003	0
ASTR	Rnf121	2.2726	0.635	0.2	1.21361	0.396	0.123	0
ASTR	Utp14b	2.00587	0.362	0.062	1.15844	0.248	0.054	0
ASTR	Caskin1	1.31863	0.263	0.056	1.15709	0.282	0.044	9.21176e-308
ASTR	Mfap3l	0.772611	0.119	0.016	1.00223	0.207	0.018	1.49861e-307
ASTR	Ddah1	0.895435	0.144	0.026	0.965097	0.208	0.019	3.1976e-304
ASTR	Gstm1	1.021	0.16	0.026	1.13374	0.22	0.022	4.52162e-303
ASTR	Tead1	1.12008	0.207	0.044	1.18123	0.26	0.037	3.40325e-302
ASTR	Rora	1.09816	0.276	0.175	2.27193	0.388	0.107	2.32829e-301
ASTR	Luzp2	0.791214	0.39	0.28	1.74449	0.489	0.159	7.24964e-301
ASTR	Hopx	1.14892	0.148	0.012	1.11447	0.195	0.016	2.48044e-299
ASTR	Emx2os	1.32577	0.208	0.027	1.0987	0.242	0.035	3.92765e-299
ASTR	Cyp2j9	1.20029	0.208	0.036	1.19069	0.253	0.034	8.02725e-299
ASTR	Eps8	0.921466	0.195	0.064	1.20037	0.305	0.056	2.83687e-295
ASTR	Tmem44	0.998265	0.152	0.019	1.05618	0.21	0.02	5.21146e-295
ASTR	Nckap5	1.18135	0.434	0.221	1.37701	0.516	0.179	9.18902e-295
ASTR	Ghr	0.721683	0.145	0.05	1.17961	0.249	0.034	6.49767e-294
ASTR	Gk	1.00199	0.196	0.047	1.1218	0.247	0.034	5.91869e-293
ASTR	Tnfaip8	0.88418	0.14	0.02	1.08475	0.2	0.018	1.42461e-292
ASTR	Ppp1r3c	0.763244	0.101	0.005	0.872035	0.146	0.004	1.51425e-292
ASTR	Sox6	0.77579	0.354	0.115	1.04626	0.439	0.112	1.05663e-290
ASTR	Wdr17	2.42999	0.157	0.079	3.48748	0.304	0.067	1.18593e-289
ASTR	Celrr	0.768815	0.112	0.007	0.846722	0.162	0.008	1.45772e-289
ASTR	Ccdc80	1.12417	0.148	0.011	0.838903	0.146	0.01	1.05328e-287
ASTR	Agl	1.33505	0.305	0.083	1.18777	0.338	0.071	2.23324e-287
ASTR	Scara3	0.91862	0.112	0.004	0.704073	0.109	0.004	6.21599e-287
ASTR	Sash1	0.946271	0.333	0.233	1.56435	0.45	0.151	1.75457e-286
ASTR	Ptch1	1.06443	0.294	0.147	1.42723	0.398	0.107	2.98133e-285
ASTR	Ranbp3l	0.965482	0.156	0.013	0.674019	0.164	0.015	5.53619e-285
ASTR	Ednrb	1.13952	0.22	0.044	1.19528	0.276	0.045	1.90561e-283
ASTR	Paqr6	0.838844	0.1	0.008	1.00339	0.16	0.008	5.20789e-283
ASTR	Mro	1.32073	0.22	0.033	1.04977	0.234	0.031	1.16845e-282
ASTR	Tlcd1	1.04147	0.146	0.014	1.08392	0.204	0.02	1.89575e-282
ASTR	Pnisr	1.03168	0.875	0.719	0.551766	0.875	0.672	2.60322e-282
ASTR	Tcf4	0.978066	0.895	0.772	0.628006	0.872	0.675	3.00692e-280
ASTR	Hnrnpa2b1	1.04881	0.894	0.749	0.500739	0.921	0.767	7.1764e-280
ASTR	Hdac8	0.867477	0.272	0.217	1.58893	0.385	0.112	1.51763e-277
ASTR	Tnfrsf19	1.09273	0.186	0.033	1.09445	0.243	0.035	2.95707e-276
ASTR	Ezr	0.811007	0.1	0.008	0.975792	0.167	0.011	4.61919e-276
ASTR	Abcd2	0.765622	0.124	0.02	0.922828	0.177	0.014	2.73492e-275
ASTR	Cadm1	0.961374	0.423	0.295	1.44347	0.515	0.2	9.72262e-275
ASTR	Adcyap1r1	0.952459	0.167	0.039	1.12354	0.256	0.039	1.84009e-273
ASTR	Lgr4	0.992387	0.188	0.065	1.1564	0.27	0.047	7.67905e-273
ASTR	Arhgap5	1.29826	0.639	0.353	1.0546	0.644	0.273	1.16332e-270
ASTR	Hapln1	0.872698	0.11	0.004	0.79239	0.12	0.007	8.16522e-270
ASTR	Thrsp	1.36484	0.17	0.019	1.24638	0.173	0.015	3.50083e-268
ASTR	Ckb	1.43779	0.583	0.278	1.08505	0.665	0.294	1.71131e-266
ASTR	Per3	1.39445	0.273	0.057	1.01003	0.247	0.056	8.86569e-266
ASTR	Nnat	1.23012	0.247	0.103	1.45837	0.38	0.102	3.62616e-265
ASTR	Frmd4a	1.22528	0.467	0.239	1.39221	0.535	0.212	1.6528e-264
ASTR	C030037D09Rik	0.933258	0.107	0.004	0.723715	0.111	0.003	2.81136e-263
ASTR	CT025619.1	1.40392	0.488	0.223	1.21306	0.495	0.171	7.11113e-263
ASTR	Tcf7l2	1.20293	0.394	0.189	1.13526	0.447	0.136	2.23131e-262
ASTR	Gabrg1	0.949974	0.148	0.02	0.991659	0.202	0.023	1.89958e-261
ASTR	Pard3b	0.597745	0.143	0.065	1.13818	0.258	0.045	1.49402e-259
ASTR	Pigk	0.698389	0.149	0.078	1.23742	0.278	0.054	2.36161e-258
ASTR	Gpld1	0.958662	0.162	0.036	1.10884	0.255	0.042	4.17873e-258
ASTR	Mras	0.596135	0.1	0.028	0.831599	0.189	0.02	2.18163e-256
ASTR	Arhgap26	0.774153	0.187	0.098	1.28612	0.301	0.068	2.99258e-256
ASTR	Tlr3	0.99484	0.134	0.01	0.897441	0.157	0.012	5.98316e-256
ASTR	Wwtr1	0.645569	0.1	0.012	0.766068	0.144	0.008	5.56743e-255
ASTR	Tmem164	0.730671	0.155	0.051	0.995015	0.251	0.042	3.30294e-254
ASTR	Grina	1.25283	0.325	0.104	1.0963	0.386	0.104	9.6216e-254
ASTR	Sybu	0.833504	0.194	0.093	1.0843	0.269	0.051	1.22372e-250
ASTR	Cyp7b1	0.6836	0.131	0.041	1.02123	0.22	0.032	3.12187e-250
ASTR	Cd38	0.893348	0.105	0.004	0.773666	0.1	0.002	1.75986e-249
ASTR	Vcam1	0.9338	0.135	0.012	0.950618	0.166	0.014	1.97463e-248
ASTR	Hes1	1.16284	0.142	0.013	0.886009	0.15	0.014	2.67479e-248
ASTR	Zeb1	0.683585	0.365	0.162	0.9366	0.47	0.147	1.58801e-247
ASTR	Foxg1	1.1801	0.174	0.022	0.935192	0.167	0.027	1.60462e-247
ASTR	Sgip1	1.08917	0.444	0.265	1.15507	0.51	0.193	1.23811e-245
ASTR	Ptpn13	0.640144	0.124	0.034	0.894156	0.179	0.019	1.99369e-244
ASTR	Pcdh10	1.18703	0.357	0.148	1.09611	0.44	0.139	4.31362e-241
ASTR	Lhx2	0.947096	0.128	0.011	0.952263	0.175	0.018	4.70958e-241
ASTR	Kcna2	1.07965	0.212	0.055	1.12435	0.252	0.045	8.70646e-241
ASTR	Pde8b	0.765668	0.186	0.063	1.00659	0.279	0.059	1.81316e-239
ASTR	Pxdn	1.02346	0.142	0.029	1.11162	0.198	0.025	2.10561e-239
ASTR	Rasa2	1.38998	0.348	0.126	1.09283	0.377	0.107	2.20359e-238
ASTR	Plxnb1	1.3258	0.327	0.117	1.09021	0.399	0.119	2.06132e-236
ASTR	Tril	1.09733	0.176	0.024	0.95134	0.196	0.028	1.63701e-235
ASTR	Pde7b	0.680744	0.171	0.062	0.926318	0.251	0.045	1.68166e-235
ASTR	Fjx1	0.950203	0.119	0.008	0.816293	0.154	0.015	1.97557e-235
ASTR	Col4a5	0.746841	0.102	0.008	0.802983	0.128	0.006	3.23748e-235
ASTR	Pfkp	1.27645	0.224	0.043	1.0076	0.222	0.041	3.34099e-235
ASTR	Notch1	1.25625	0.24	0.049	0.962888	0.25	0.048	3.62022e-235
ASTR	Pdlim4	0.921431	0.112	0.007	0.718217	0.101	0.01	6.21916e-235
ASTR	Gnao1	0.995429	0.745	0.575	1.03859	0.743	0.426	3.34154e-233
ASTR	Wasf3	1.3252	0.298	0.078	1.03148	0.347	0.098	8.3389e-233
ASTR	Jakmip1	0.741	0.1	0.013	0.768052	0.147	0.011	2.13717e-232
ASTR	Ccdc85a	0.971439	0.166	0.033	0.933291	0.206	0.03	3.69169e-230
ASTR	Itsn1	0.873491	0.226	0.113	1.18403	0.371	0.113	9.28257e-230
ASTR	Gsap	1.20085	0.287	0.09	0.953085	0.345	0.088	1.10773e-229
ASTR	Gm15601	1.18724	0.168	0.023	1.0918	0.176	0.026	1.19135e-229
ASTR	Abhd3	0.945328	0.157	0.03	0.909023	0.2	0.028	2.08316e-229
ASTR	Mtss1l	1.00875	0.244	0.087	0.991941	0.32	0.078	6.31808e-229
ASTR	Sox5	0.513477	0.218	0.091	0.906479	0.312	0.072	4.48547e-228
ASTR	Dpf3	0.686268	0.133	0.038	0.919661	0.212	0.033	1.7301e-227
ASTR	Adk	0.804835	0.311	0.24	1.24256	0.418	0.147	1.98083e-227
ASTR	Sfxn1	1.13266	0.17	0.03	1.0856	0.207	0.031	5.96341e-227
ASTR	Meis2	1.3293	0.313	0.107	1.16778	0.363	0.104	6.01567e-226
ASTR	Cables1	0.612315	0.116	0.031	0.868904	0.175	0.02	2.08203e-224
ASTR	Gsdme	0.861533	0.21	0.075	0.999417	0.326	0.082	1.45592e-223
ASTR	Prrx1	1.09792	0.216	0.048	0.976127	0.241	0.045	3.42361e-221
ASTR	Slitrk2	1.17084	0.203	0.036	0.955238	0.213	0.039	1.19752e-220
ASTR	Cry2	1.18257	0.232	0.067	1.02808	0.257	0.054	2.9643e-214
ASTR	Timp3	1.1115	0.229	0.056	1.09244	0.278	0.064	3.60973e-213
ASTR	Irak2	0.649782	0.151	0.061	0.890768	0.219	0.038	7.82063e-213
ASTR	Serpine2	1.15147	0.365	0.117	0.721699	0.377	0.121	1.78119e-212
ASTR	Gpam	0.768517	0.124	0.021	0.786696	0.152	0.015	5.60104e-212
ASTR	Aox1	0.949337	0.128	0.013	0.782753	0.132	0.01	6.55221e-212
ASTR	Astn1	0.779422	0.198	0.079	0.98066	0.297	0.073	1.01563e-211
ASTR	Plcb1	0.869996	0.26	0.118	1.32011	0.358	0.108	4.47378e-211
ASTR	Fermt2	0.838418	0.355	0.262	1.15926	0.469	0.183	5.34958e-211
ASTR	Gm15520	0.949119	0.12	0.011	0.791123	0.117	0.013	1.10885e-210
ASTR	Efr3b	0.539488	0.168	0.11	1.01834	0.318	0.085	1.58063e-209
ASTR	Trak1	0.90949	0.188	0.062	0.950166	0.244	0.05	4.35644e-209
ASTR	Lpp	0.799608	0.219	0.089	0.990172	0.301	0.078	2.60512e-208
ASTR	Csdc2	0.792924	0.101	0.01	0.744961	0.123	0.007	3.33548e-208
ASTR	Glul	1.20074	0.442	0.24	1.03557	0.469	0.173	6.99903e-208
ASTR	Camk2d	0.782733	0.301	0.167	0.920986	0.358	0.107	1.41724e-207
ASTR	Arhgef12	0.799209	0.44	0.353	1.09013	0.546	0.252	7.72593e-206
ASTR	Etv4	0.680063	0.124	0.039	0.75714	0.201	0.032	1.31329e-205
ASTR	Daam2	0.661954	0.503	0.421	0.973689	0.611	0.283	1.18708e-204
ASTR	Trib2	0.961378	0.168	0.039	0.873611	0.22	0.039	4.04288e-204
ASTR	Sh3pxd2b	0.796905	0.116	0.018	0.807363	0.164	0.02	7.12871e-204
ASTR	Celf2	0.804195	0.399	0.219	1.05481	0.483	0.193	1.39807e-203
ASTR	Rapgef3	1.35727	0.279	0.084	1.08389	0.307	0.083	2.0773e-202
ASTR	Rab34	0.981257	0.161	0.035	0.893654	0.208	0.036	7.57084e-202
ASTR	Dzip1l	0.961189	0.128	0.014	0.780504	0.125	0.015	6.64222e-201
ASTR	4930488L21Rik	0.634915	0.123	0.048	0.790333	0.17	0.023	1.37052e-199
ASTR	Ivd	1.33018	0.273	0.075	0.822038	0.242	0.067	1.99957e-199
ASTR	Mapk10	0.733015	0.216	0.109	0.977162	0.304	0.082	4.39298e-199
ASTR	Pfkm	0.849843	0.13	0.02	0.840792	0.173	0.023	9.34879e-199
ASTR	Lrp4	0.825749	0.158	0.057	0.939837	0.223	0.044	5.18094e-198
ASTR	Echdc2	0.945616	0.124	0.017	0.996794	0.179	0.026	1.22203e-197
ASTR	Lcat	0.891389	0.12	0.012	0.828338	0.141	0.016	5.1211e-197
ASTR	Emx2	1.0434	0.129	0.015	0.874697	0.156	0.019	5.42269e-196
ASTR	Pcdh7	0.69109	0.297	0.155	1.12955	0.411	0.147	1.54226e-195
ASTR	Msmo1	1.28301	0.306	0.119	1.09862	0.304	0.082	2.18423e-195
ASTR	Il18	0.753393	0.23	0.153	1.06629	0.339	0.106	1.12408e-194
ASTR	E130114P18Rik	0.750715	0.147	0.049	0.902389	0.218	0.043	7.3859e-194
ASTR	Pld2	0.719696	0.12	0.035	0.957529	0.184	0.029	5.56797e-193
ASTR	Mrpl18	0.848099	0.142	0.044	0.940695	0.187	0.03	5.76451e-193
ASTR	Usp53	1.04525	0.21	0.073	1.01155	0.264	0.063	1.80589e-192
ASTR	Arrb1	0.86384	0.153	0.036	0.864074	0.218	0.043	6.23231e-191
ASTR	Spry2	0.995259	0.179	0.043	0.918345	0.207	0.038	1.08578e-190
ASTR	Cachd1	0.587304	0.118	0.043	0.752503	0.186	0.03	3.96672e-190
ASTR	Cbx5	0.980429	0.281	0.14	0.98168	0.358	0.114	4.86245e-190
ASTR	D130040H23Rik	0.660036	0.205	0.131	1.02116	0.276	0.071	1.1114e-189
ASTR	Prelid3a	0.652894	0.106	0.033	0.757774	0.164	0.023	2.81998e-189
ASTR	Timp4	0.907156	0.147	0.033	0.860627	0.176	0.028	1.42808e-183
ASTR	Apba2	0.594036	0.138	0.057	0.839056	0.223	0.047	4.30156e-183
ASTR	Tiparp	0.679212	0.121	0.038	0.848545	0.206	0.04	1.25693e-182
ASTR	Sdc2	0.546653	0.112	0.031	0.767741	0.177	0.028	2.45833e-182
ASTR	Igfbp5	1.20879	0.127	0.016	1.1377	0.125	0.014	3.84227e-182
ASTR	Asrgl1	1.00784	0.298	0.148	0.911494	0.335	0.104	1.33674e-181
ASTR	Hivep3	0.630846	0.263	0.19	1.02367	0.345	0.115	3.18031e-180
ASTR	Itpkb	1.00443	0.167	0.041	0.833033	0.188	0.033	5.60566e-180
ASTR	A830082K12Rik	0.870039	0.143	0.032	0.830888	0.188	0.033	1.14763e-179
ASTR	Chst1	0.848963	0.109	0.015	0.767058	0.134	0.014	2.25767e-178
ASTR	Kbtbd11	1.08547	0.188	0.041	1.03221	0.228	0.05	8.33734e-178
ASTR	Map2k6	0.514135	0.101	0.036	0.623205	0.154	0.021	1.00534e-177
ASTR	Tom1l1	0.826575	0.133	0.025	0.810014	0.196	0.037	1.32215e-177
ASTR	Ugp2	0.772633	0.261	0.182	1.05467	0.36	0.125	5.06469e-177
ASTR	Prkd1	0.535764	0.154	0.109	1.00309	0.264	0.073	5.11473e-173
ASTR	Pou3f3	1.30421	0.374	0.151	0.897257	0.38	0.14	5.39425e-172
ASTR	Eya1	1.01412	0.251	0.08	0.814122	0.285	0.08	2.46814e-171
ASTR	Rnf182	0.700959	0.112	0.018	0.695056	0.136	0.016	1.76541e-169
ASTR	6430573F11Rik	0.767263	0.12	0.027	0.785375	0.163	0.026	1.91972e-169
ASTR	Pnpla7	1.02232	0.273	0.117	0.871124	0.28	0.079	2.56663e-169
ASTR	Cep85l	0.654968	0.224	0.162	1.01242	0.313	0.102	2.73034e-169
ASTR	Gpm6b	0.572586	0.725	0.641	0.809536	0.752	0.474	4.95106e-169
ASTR	Fads1	0.795075	0.143	0.038	0.850361	0.193	0.038	8.75182e-169
ASTR	Slc1a4	0.746082	0.117	0.015	0.683913	0.147	0.02	3.12258e-166
ASTR	Fam213a	1.12947	0.209	0.052	0.757641	0.208	0.05	5.57248e-166
ASTR	Ildr2	0.736502	0.104	0.013	0.620851	0.11	0.009	6.1094e-166
ASTR	Wnk2	0.846511	0.137	0.028	0.718035	0.155	0.024	1.43143e-164
ASTR	Il15ra	0.754164	0.103	0.011	0.764102	0.115	0.011	2.38743e-164
ASTR	Dlg5	0.575975	0.11	0.046	0.773561	0.17	0.03	8.15406e-164
ASTR	Mir9-3hg	0.511833	0.236	0.102	0.632509	0.335	0.105	4.11868e-163
ASTR	Nfib	0.760032	0.588	0.447	0.801707	0.629	0.344	6.72827e-163
ASTR	Adgrl3	0.529971	0.343	0.245	1.15274	0.453	0.208	1.55704e-162
ASTR	Gna13	0.820703	0.17	0.059	0.801755	0.213	0.049	1.4477e-160
ASTR	Chst2	1.07848	0.17	0.035	0.717177	0.155	0.034	4.22485e-160
ASTR	Fbrsl1	0.582818	0.196	0.118	0.821595	0.279	0.083	3.8113e-158
ASTR	Asap2	0.731669	0.185	0.104	0.811037	0.258	0.072	3.85161e-158
ASTR	Sema4b	0.776715	0.109	0.014	0.70783	0.132	0.017	9.30046e-158
ASTR	Epha5	0.565373	0.148	0.079	0.848321	0.263	0.074	2.46372e-157
ASTR	Nphp3	0.667126	0.116	0.04	0.78897	0.184	0.038	3.04039e-154
ASTR	Phactr3	0.930298	0.436	0.275	0.869038	0.441	0.189	6.12339e-154
ASTR	Tulp3	0.777499	0.186	0.086	0.845834	0.23	0.06	1.52607e-152
ASTR	Adgrg1	0.819797	0.153	0.04	0.813712	0.192	0.041	3.05163e-152
ASTR	Spire1	0.625591	0.274	0.216	0.866937	0.333	0.12	2.06718e-151
ASTR	Cd63	0.898393	0.233	0.101	0.818625	0.282	0.086	4.11313e-151
ASTR	Kank1	0.59686	0.205	0.104	0.826136	0.281	0.086	2.33742e-150
ASTR	Fam228b	0.775564	0.25	0.159	0.885711	0.266	0.079	2.46162e-149
ASTR	Sesn3	0.989982	0.211	0.078	0.843704	0.235	0.064	3.03743e-148
ASTR	Gramd3	0.523078	0.182	0.144	0.877889	0.272	0.086	7.74128e-146
ASTR	Arntl	0.566799	0.124	0.064	0.787855	0.205	0.05	1.54862e-145
ASTR	Adgrl1	0.998145	0.238	0.084	0.814477	0.281	0.088	2.38696e-145
ASTR	Bhlhe40	0.908158	0.117	0.018	0.673871	0.118	0.018	4.56241e-144
ASTR	Mid1	0.686802	0.113	0.028	0.663278	0.156	0.029	9.6556e-144
ASTR	Npas3	0.550093	0.242	0.353	2.06139	0.392	0.198	9.79484e-144
ASTR	Ccdc88c	0.976987	0.183	0.05	0.809262	0.2	0.048	1.84629e-143
ASTR	Rimklb	0.712717	0.131	0.045	0.734647	0.188	0.042	3.23293e-143
ASTR	Enah	1.09514	0.378	0.186	0.854951	0.435	0.19	1.43825e-142
ASTR	Pou2f1	0.594246	0.271	0.222	0.898643	0.35	0.136	1.85526e-141
ASTR	4930402H24Rik	0.593581	0.573	0.525	0.855907	0.614	0.358	1.85594e-141
ASTR	Eci2	0.59113	0.113	0.041	0.677859	0.179	0.038	3.24007e-141
ASTR	Magi3	0.571372	0.136	0.064	0.736012	0.192	0.045	1.18215e-140
ASTR	Pde10a	1.56975	0.24	0.089	1.345	0.263	0.084	9.03952e-140
ASTR	Cs	0.76723	0.162	0.069	0.756024	0.205	0.051	8.17182e-139
ASTR	Kifc3	0.880424	0.159	0.053	0.708007	0.208	0.053	8.55164e-139
ASTR	Adam23	0.574094	0.154	0.093	0.800282	0.228	0.064	4.12942e-138
ASTR	Fam184a	0.820268	0.181	0.09	0.91275	0.26	0.083	2.90227e-137
ASTR	Plce1	0.570925	0.112	0.038	0.673511	0.152	0.029	9.11285e-135
ASTR	Nsdhl	0.562674	0.107	0.046	0.804267	0.175	0.039	4.10251e-133
ASTR	Lrp1	0.723147	0.337	0.155	0.550719	0.394	0.155	6.1577e-132
ASTR	Zfp36l1	0.979256	0.257	0.087	0.604406	0.266	0.085	5.53563e-131
ASTR	Eno1	0.957905	0.195	0.056	0.779886	0.203	0.052	9.01362e-131
ASTR	Wsb1	1.02743	0.486	0.273	0.684839	0.535	0.271	1.97e-130
ASTR	Hlf	0.639127	0.127	0.037	0.6155	0.147	0.028	3.05127e-130
ASTR	Dock7	0.685919	0.156	0.053	0.601357	0.207	0.054	8.48459e-130
ASTR	Dtx3	0.903979	0.258	0.124	0.755174	0.324	0.121	2.82353e-128
ASTR	Abi1	0.583283	0.276	0.223	0.750181	0.353	0.144	3.92549e-127
ASTR	Chd9	0.732026	0.583	0.435	0.628183	0.665	0.375	4.70605e-127
ASTR	Slc41a1	0.670056	0.113	0.031	0.687894	0.145	0.028	4.9908e-127
ASTR	Tex9	0.978163	0.173	0.048	0.772817	0.175	0.042	2.43817e-124
ASTR	Rcn2	0.830523	0.188	0.066	0.706792	0.234	0.072	3.50572e-122
ASTR	Dag1	0.593079	0.122	0.05	0.667452	0.164	0.038	1.471e-118
ASTR	Ampd2	0.68721	0.116	0.031	0.719085	0.149	0.032	2.15647e-117
ASTR	Pantr1	0.890817	0.202	0.083	0.646846	0.226	0.07	3.85237e-117
ASTR	Crtc3	0.88518	0.214	0.103	0.685247	0.244	0.08	4.04976e-117
ASTR	Slc25a3	1.07508	0.409	0.214	0.605554	0.409	0.208	1.30525e-116
ASTR	Dnah7b	0.811987	0.124	0.033	0.608356	0.133	0.026	9.60715e-115
ASTR	Ap3m1	0.93466	0.252	0.142	0.915888	0.248	0.087	6.31115e-114
ASTR	Gm20515	0.936503	0.142	0.034	0.652495	0.151	0.042	5.75184e-113
ASTR	Ldhb	0.544679	0.156	0.075	0.617622	0.219	0.067	1.01205e-112
ASTR	Akr1b10	0.790423	0.124	0.026	0.591228	0.141	0.032	1.57071e-112
ASTR	Xpr1	0.596027	0.252	0.173	0.709937	0.324	0.133	5.10434e-110
ASTR	Psap	0.69852	0.433	0.294	0.634478	0.463	0.229	3.79434e-109
ASTR	Epas1	0.671371	0.125	0.047	0.546176	0.157	0.038	1.67123e-108
ASTR	Leng8	0.98428	0.516	0.332	0.645288	0.533	0.31	1.68395e-108
ASTR	Hacd3	0.7533	0.166	0.078	0.655045	0.202	0.061	1.8521e-108
ASTR	Alms1	0.683451	0.137	0.053	0.624282	0.152	0.036	8.31823e-108
ASTR	Hmgcr	0.763419	0.151	0.061	0.724966	0.188	0.054	1.61018e-107
ASTR	Cspp1	1.05973	0.514	0.336	0.522247	0.525	0.31	1.72791e-107
ASTR	Asph	0.565069	0.17	0.071	0.518501	0.205	0.063	4.07304e-104
ASTR	Swap70	0.809707	0.143	0.037	0.53629	0.16	0.041	2.17171e-103
ASTR	Mcur1	0.572851	0.102	0.028	0.508904	0.137	0.03	2.36433e-103
ASTR	Pcgf5	0.874954	0.129	0.032	0.647908	0.135	0.03	1.13341e-101
ASTR	Atp2b2	0.512406	0.139	0.061	0.555452	0.187	0.055	6.32837e-101
ASTR	Cnn3	0.603135	0.12	0.054	0.574413	0.164	0.044	1.48721e-100
ASTR	Pmm1	0.697648	0.12	0.04	0.560985	0.141	0.033	3.39355e-99
ASTR	Prnp	0.840536	0.267	0.144	0.659553	0.282	0.11	3.82562e-99
ASTR	Arl8a	0.55247	0.135	0.074	0.701341	0.211	0.07	1.82534e-98
ASTR	Ocrl	0.796739	0.197	0.106	0.670538	0.224	0.078	1.92534e-98
ASTR	Dkk3	0.765906	0.112	0.024	0.554967	0.125	0.028	1.47565e-97
ASTR	Mocs2	0.721744	0.136	0.048	0.602728	0.177	0.051	3.16431e-97
ASTR	Tsc22d1	0.574672	0.174	0.103	0.595312	0.241	0.088	1.42095e-95
ASTR	Slc38a1	1.38155	0.147	0.042	0.911919	0.125	0.041	1.20729e-94
ASTR	Col11a2	1.04135	0.177	0.064	0.72236	0.241	0.089	1.88114e-94
ASTR	Tpcn1	0.500046	0.139	0.087	0.578969	0.203	0.066	3.47825e-94
ASTR	Map2	0.683835	0.444	0.299	0.522283	0.498	0.268	1.6266e-93
ASTR	Dhtkd1	0.675949	0.123	0.044	0.575767	0.136	0.033	2.01129e-93
ASTR	Phyhipl	0.657968	0.297	0.221	0.626238	0.358	0.167	4.20962e-93
ASTR	Idh3b	0.898722	0.236	0.11	0.638649	0.306	0.13	2.6574e-92
ASTR	Klhl5	0.59187	0.183	0.108	0.571732	0.238	0.089	1.06659e-91
ASTR	Kidins220	0.639563	0.418	0.358	0.637331	0.458	0.25	2.02795e-91
ASTR	Eif5	0.823269	0.24	0.12	0.566467	0.293	0.122	7.57451e-91
ASTR	Fbxo44	0.690685	0.163	0.079	0.627012	0.21	0.073	1.46524e-90
ASTR	Mfn1	0.503271	0.218	0.183	0.663856	0.312	0.141	3.04979e-90
ASTR	Smox	0.728375	0.139	0.06	0.567667	0.169	0.051	6.6666e-89
ASTR	Sorl1	0.747814	0.22	0.128	0.597088	0.224	0.083	8.71832e-89
ASTR	Klf9	0.784724	0.177	0.075	0.6182	0.159	0.046	1.61315e-88
ASTR	Cyp2j6	0.675372	0.145	0.072	0.639731	0.19	0.064	9.76573e-88
ASTR	Zfp516	0.514777	0.1	0.043	0.547127	0.141	0.038	1.7656e-87
ASTR	Peg3	0.944598	0.253	0.12	0.617802	0.281	0.117	2.41136e-87
ASTR	B3galt2	0.890653	0.185	0.082	0.649886	0.235	0.089	3.13126e-87
ASTR	Crot	0.970387	0.232	0.104	0.644657	0.235	0.09	9.15784e-86
ASTR	Fibp	0.696867	0.154	0.065	0.601686	0.228	0.087	6.92326e-84
ASTR	Pitpnm2	0.604553	0.108	0.04	0.521458	0.14	0.038	7.41804e-84
ASTR	Atp2a2	0.501623	0.267	0.218	0.560604	0.358	0.174	1.11837e-83
ASTR	Hdhd5	0.559052	0.109	0.053	0.514225	0.146	0.041	3.72112e-83
ASTR	Zfp36l2	0.691884	0.166	0.064	0.531035	0.193	0.066	1.71491e-82
ASTR	Cd81	0.801667	0.481	0.348	0.546436	0.525	0.296	5.51015e-81
ASTR	Cc2d2a	0.722382	0.22	0.129	0.613984	0.249	0.104	8.12991e-81
ASTR	Kcnk2	0.70696	0.127	0.041	0.54422	0.164	0.052	1.02458e-80
ASTR	Spag9	0.606661	0.535	0.46	0.552911	0.603	0.39	1.03941e-80
ASTR	Aldh1a1	0.666432	0.101	0.03	0.624616	0.128	0.034	9.07205e-80
ASTR	Add3	0.592925	0.285	0.224	0.608217	0.329	0.163	1.408e-78
ASTR	Clasp1	0.574053	0.258	0.195	0.55029	0.292	0.136	3.00876e-76
ASTR	Amer2	0.661856	0.169	0.09	0.513821	0.2	0.074	6.32035e-76
ASTR	Chpt1	0.793388	0.223	0.115	0.563883	0.244	0.102	6.75945e-76
ASTR	Bmyc	0.586802	0.147	0.074	0.551181	0.174	0.059	1.85552e-75
ASTR	Dlg4	0.747205	0.161	0.062	0.519697	0.174	0.06	1.16372e-73
ASTR	Ldlr	0.566873	0.122	0.065	0.589816	0.141	0.044	1.00701e-72
ASTR	P3h3	0.626453	0.112	0.036	0.519658	0.153	0.05	2.09361e-71
ASTR	Mrps5	0.883831	0.25	0.122	0.53302	0.289	0.134	2.47021e-71
ASTR	Chka	0.722452	0.275	0.186	0.549376	0.337	0.172	1.40351e-68
ASTR	Bbof1	0.862263	0.148	0.061	0.590458	0.16	0.058	1.58702e-64
ASTR	Ift81	0.739017	0.144	0.063	0.519551	0.151	0.055	7.59693e-61
ASTR	2810403A07Rik	0.619414	0.228	0.152	0.536209	0.253	0.121	1.97641e-59
ASTR	Them4	0.607514	0.112	0.044	0.603082	0.139	0.05	8.1578e-56
MG	Mgat4a	2.4411	0.439	0.03	2.29013	0.298	0.025	0
MG	Slc40a1	2.0082	0.281	0.005	1.8809	0.186	0.006	0
MG	Casp8	1.61298	0.248	0.003	1.56464	0.167	0.004	0
MG	A630001G21Rik	1.69983	0.248	0.001	1.96756	0.216	0.001	0
MG	Inpp5d	4.05075	0.695	0.003	3.76562	0.555	0.004	0
MG	Srgap2	3.55379	0.847	0.242	3.33944	0.735	0.179	0
MG	Ptprc	3.53996	0.635	0.004	3.89917	0.583	0.004	0
MG	Cfh	2.94553	0.527	0.013	2.7003	0.356	0.009	0
MG	Ivns1abp	3.7569	0.826	0.108	3.94311	0.793	0.098	0
MG	Ncf2	1.59367	0.232	0.006	1.7793	0.182	0.005	0
MG	A830008E24Rik	1.82708	0.256	0.006	2.42469	0.269	0.008	0
MG	Rcsd1	1.8791	0.283	0.006	1.70994	0.175	0.004	0
MG	Fcgr3	1.44958	0.192	0.001	1.64642	0.151	0.002	0
MG	Fcer1g	1.57025	0.199	0.004	1.81536	0.181	0.004	0
MG	Arhgap30	1.7931	0.257	0.001	2.0008	0.203	0.001	0
MG	F11r	1.43935	0.216	0.003	1.41615	0.141	0.002	0
MG	Cd84	1.76189	0.227	0.002	2.54674	0.285	0.002	0
MG	Apbb1ip	2.90438	0.553	0.044	3.12628	0.472	0.031	0
MG	Ptgs1	2.20237	0.355	0.005	2.26103	0.26	0.009	0
MG	Capn3	1.97347	0.308	0.002	1.88677	0.211	0.002	0
MG	Gpr34	2.66068	0.44	0.008	2.81357	0.363	0.008	0
MG	Arhgap4	1.82472	0.262	0.004	2.05803	0.23	0.006	0
MG	Ophn1	2.8213	0.631	0.098	2.66309	0.508	0.118	0
MG	Btk	1.72367	0.265	0.001	1.77038	0.169	0.001	0
MG	P2ry12	3.4172	0.613	0.021	3.21382	0.477	0.023	0
MG	Fcrls	3.2387	0.565	0.006	3.98521	0.605	0.009	0
MG	Il6ra	2.26427	0.383	0.005	2.21918	0.257	0.004	0
MG	Ctss	2.49643	0.402	0.009	2.24893	0.269	0.013	0
MG	Olfml3	1.62184	0.194	0.005	1.94537	0.207	0.005	0
MG	Bank1	2.09889	0.289	0.002	1.51876	0.147	0.001	0
MG	Lyn	2.99733	0.561	0.036	2.68389	0.381	0.035	0
MG	Tgfbr1	3.98141	0.722	0.097	3.74374	0.655	0.079	0
MG	Csf3r	2.77537	0.465	0.002	2.69867	0.33	0.002	0
MG	Laptm5	2.34699	0.378	0.004	2.43071	0.284	0.005	0
MG	C1qb	2.81253	0.447	0.013	2.69779	0.347	0.012	0
MG	C1qc	2.67214	0.433	0.007	2.36134	0.278	0.005	0
MG	C1qa	2.9096	0.446	0.013	2.9631	0.387	0.016	0
MG	Pik3cd	1.87872	0.308	0.004	1.62616	0.177	0.006	0
MG	Rhoh	2.66784	0.401	0.001	2.99709	0.364	0.001	0
MG	Tec	1.56492	0.254	0.005	1.67414	0.181	0.006	0
MG	Tmem119	1.87497	0.261	0.004	1.96945	0.206	0.004	0
MG	Selplg	3.50203	0.612	0.005	3.5752	0.555	0.008	0
MG	Ncf1	2.17903	0.311	0.001	1.88328	0.184	0.002	0
MG	Mlxipl	2.55308	0.399	0.009	2.79015	0.37	0.009	0
MG	Irf5	1.3092	0.184	0.001	1.34319	0.13	0.001	0
MG	Tbxas1	1.87366	0.324	0.012	1.84283	0.217	0.01	0
MG	Hpgds	3.42616	0.673	0.031	3.57978	0.628	0.035	0
MG	Hk2	3.22815	0.564	0.006	3.24307	0.443	0.007	0
MG	Arhgap25	1.93357	0.313	0.003	1.56814	0.167	0.002	0
MG	Lair1	3.21998	0.585	0.015	3.2901	0.505	0.025	0
MG	Pou2f2	2.58218	0.455	0.022	2.35144	0.302	0.02	0
MG	Tyrobp	1.50522	0.2	0.003	1.66606	0.167	0.005	0
MG	Cd33	2.80626	0.462	0.003	3.10091	0.403	0.003	0
MG	Cd37	2.54224	0.391	0.002	2.61269	0.31	0.001	0
MG	Siglech	3.76345	0.631	0.003	3.80671	0.565	0.004	0
MG	Lrrk1	1.75109	0.278	0.009	1.66233	0.182	0.007	0
MG	Mef2a	2.84193	0.822	0.319	2.5877	0.671	0.243	0
MG	AU020206	1.63627	0.219	0.004	1.72792	0.16	0.004	0
MG	Fes	1.24569	0.158	0.001	1.56958	0.157	0.002	0
MG	Tm6sf1	2.18061	0.338	0.024	2.23368	0.281	0.025	0
MG	Slco2b1	3.06002	0.539	0.01	3.00582	0.41	0.007	0
MG	P2ry6	2.92428	0.468	0.002	3.26179	0.422	0.001	0
MG	Pde3b	3.30723	0.525	0.029	2.71129	0.326	0.021	0
MG	Itgam	1.57458	0.196	0.001	1.66357	0.149	0.002	0
MG	Rgs10	2.28932	0.389	0.005	1.99432	0.231	0.005	0
MG	Epb41l2	2.98107	0.727	0.215	2.90007	0.674	0.186	0
MG	Vsir	2.64016	0.455	0.007	2.62805	0.347	0.01	0
MG	Arhgap45	3.73645	0.703	0.003	3.98992	0.65	0.002	0
MG	Gna15	2.19666	0.353	0.001	2.37383	0.272	0.001	0
MG	Gmip	1.74453	0.276	0.014	2.10983	0.274	0.021	0
MG	Adcy7	1.68912	0.223	0.003	2.04442	0.217	0.003	0
MG	Lpcat2	2.54336	0.507	0.074	2.30729	0.343	0.032	0
MG	Zfhx3	3.61204	0.628	0.063	3.21713	0.475	0.054	0
MG	Maf	3.32493	0.564	0.018	3.4878	0.536	0.019	0
MG	Irf8	2.76344	0.449	0.002	2.92699	0.374	0.003	0
MG	Prkcd	2.59394	0.471	0.02	2.68761	0.4	0.034	0
MG	Stab1	2.98369	0.385	0.003	2.51617	0.268	0.002	0
MG	1810011H11Rik	1.1586	0.157	0.001	1.24753	0.127	0	0
MG	Slc7a8	1.97578	0.317	0.009	1.74568	0.191	0.006	0
MG	Kctd12	2.14419	0.303	0.01	2.46864	0.284	0.013	0
MG	Fli1	2.76321	0.438	0.008	2.14726	0.24	0.006	0
MG	Il10ra	1.94515	0.308	0.002	2.08248	0.232	0.002	0
MG	Ppcdc	2.20389	0.433	0.063	2.5891	0.39	0.049	0
MG	Ctsh	1.91512	0.28	0.006	2.24839	0.245	0.005	0
MG	Cmtm7	2.30411	0.362	0.005	2.15703	0.249	0.004	0
MG	Cx3cr1	3.41024	0.625	0.02	3.39957	0.509	0.02	0
MG	Ccr5	2.46776	0.359	0.004	2.89496	0.35	0.005	0
MG	Ikzf1	2.64518	0.423	0.002	2.23636	0.257	0.001	0
MG	Lcp2	1.77348	0.28	0.001	1.65603	0.171	0.002	0
MG	Dock2	3.21106	0.561	0.012	2.99061	0.39	0.007	0
MG	Havcr2	1.42838	0.185	0.001	1.56015	0.142	0.001	0
MG	9930111J21Rik2	1.74425	0.227	0.003	1.75044	0.153	0.002	0
MG	Adap2	2.80997	0.513	0.006	2.4799	0.304	0.005	0
MG	Adap2os	2.15129	0.347	0.003	2.27597	0.264	0.003	0
MG	Abi3	1.92294	0.299	0.001	1.80302	0.194	0.002	0
MG	Slc16a6	2.03139	0.363	0.031	2.04369	0.265	0.023	0
MG	Abca9	2.74901	0.484	0.009	2.74238	0.354	0.006	0
MG	Cd300c2	1.34028	0.186	0.001	1.49239	0.139	0.002	0
MG	Ly86	3.31399	0.565	0.003	3.41417	0.464	0.003	0
MG	Susd3	1.13864	0.137	0.001	1.44075	0.137	0.002	0
MG	Syk	1.62033	0.232	0.006	1.6993	0.183	0.008	0
MG	Golm1	2.05567	0.308	0.008	2.18742	0.266	0.014	0
MG	Mef2c	3.67373	0.798	0.072	3.70093	0.727	0.077	0
MG	Hexb	3.54591	0.653	0.084	3.09714	0.559	0.129	0
MG	Gm5086	1.57792	0.243	0.001	1.17589	0.127	0	0
MG	Naip5	1.42431	0.181	0.001	1.57132	0.14	0.001	0
MG	Cd180	2.00403	0.32	0.01	1.80523	0.188	0.007	0
MG	Pik3cg	1.8375	0.264	0	1.41671	0.144	0.001	0
MG	Pld4	2.08076	0.296	0.002	2.59802	0.292	0.003	0
MG	Ighm	1.87844	0.189	0.001	1.80881	0.164	0.001	0
MG	Fyb	3.34696	0.602	0.006	3.40081	0.483	0.003	0
MG	Fam105a	2.36016	0.407	0.008	2.11705	0.259	0.011	0
MG	Sla	1.47086	0.202	0.001	1.66984	0.161	0.001	0
MG	Cyth4	3.60999	0.689	0.003	3.71567	0.579	0.004	0
MG	Nfam1	1.47107	0.197	0.001	1.39521	0.131	0.001	0
MG	Bin2	2.12698	0.343	0.001	1.84488	0.208	0.001	0
MG	Nckap1l	2.44601	0.413	0.001	2.11452	0.253	0.002	0
MG	Cd86	1.72608	0.275	0.002	1.37818	0.137	0.001	0
MG	Samsn1	1.43001	0.19	0.002	1.50778	0.129	0.001	0
MG	Runx1	2.82423	0.458	0.003	2.57298	0.316	0.002	0
MG	Fgd2	3.20131	0.555	0.002	3.13805	0.447	0.004	0
MG	Rasal3	1.48087	0.19	0.001	1.93706	0.196	0.002	0
MG	Myo1f	2.26744	0.385	0.002	1.9742	0.226	0.001	0
MG	Trem2	2.14792	0.339	0.005	2.07838	0.212	0.004	0
MG	Dennd1c	1.57339	0.207	0.002	1.47774	0.141	0.001	0
MG	Csf1r	3.65891	0.675	0.009	3.67026	0.568	0.01	0
MG	Unc93b1	2.8975	0.558	0.03	3.08289	0.496	0.026	0
MG	Sipa1	1.99642	0.334	0.018	2.1039	0.267	0.017	0
MG	Fermt3	1.98838	0.307	0.004	2.06581	0.232	0.005	0
MG	Gcnt1	2.18901	0.347	0.003	2.37726	0.268	0.002	0
MG	Dock8	2.84406	0.448	0.003	2.19015	0.233	0.004	0
MG	Entpd1	2.47551	0.43	0.023	2.25072	0.297	0.032	0
MG	Blnk	2.47479	0.414	0.002	2.29538	0.266	0.001	0
MG	Pik3ap1	1.73848	0.275	0.001	1.15529	0.134	0	0
MG	AC149090.1	2.56331	0.794	0.274	2.85061	0.733	0.201	0
MG	Vav1	1.55349	0.23	0	1.13845	0.125	0.001	0
MG	Mir142hg	1.53233	0.243	0.001	1.07469	0.117	0	0
MG	P2ry13	1.47848	0.178	0.002	1.583	0.133	0.002	0
MG	Lpar6	2.03535	0.34	0.039	2.36533	0.303	0.038	0
MG	Hck	1.40838	0.205	0.002	1.25456	0.128	0.001	0
MG	Gm31243	1.04365	0.11	0	1.47478	0.116	0	0
MG	Arhgap22	2.01283	0.318	0.007	1.51015	0.161	0.006	0
MG	Arrb2	1.96076	0.345	0.034	2.13597	0.323	0.045	0
MG	Mylip	2.20237	0.377	0.015	1.72456	0.2	0.013	0
MG	Slfn8	0.921152	0.103	0.001	1.37814	0.117	0.001	0
MG	Rbm47	1.45926	0.214	0.003	1.14761	0.116	0.001	0
MG	Akap13	2.38632	0.587	0.12	2.37997	0.442	0.1	0
MG	Sirpa	2.70008	0.522	0.049	2.36971	0.385	0.073	0
MG	Il21r	1.06049	0.149	0	1.28823	0.109	0	0
MG	Lgmn	2.58894	0.497	0.084	2.24055	0.336	0.052	0
MG	Plcg2	1.88808	0.315	0.003	1.31809	0.151	0.005	0
MG	Arap3	1.26474	0.175	0.002	1.30802	0.124	0.002	0
MG	Mafb	1.58747	0.188	0.006	1.61537	0.15	0.005	0
MG	Lrmp	1.23287	0.147	0.001	1.24208	0.106	0	0
MG	4933406I18Rik	2.91217	0.415	0.025	1.91035	0.206	0.016	0
MG	Tmem173	1.15203	0.123	0.001	1.44062	0.118	0.002	0
MG	Spi1	1.46394	0.226	0	0.930757	0.108	0.001	0
MG	Wdfy4	1.53449	0.234	0.001	0.985796	0.109	0.001	0
MG	Slc11a1	1.53144	0.197	0.001	1.43508	0.118	0.002	0
MG	Cdh23	2.02615	0.316	0.004	1.24048	0.142	0.005	0
MG	Tgfb1	1.28046	0.179	0.001	1.1716	0.114	0.001	0
MG	Aif1	1.23188	0.145	0.002	1.3635	0.119	0.002	0
MG	Ltc4s	1.38937	0.194	0.001	1.19789	0.123	0.002	0
MG	Lyl1	1.40028	0.16	0.001	1.28075	0.115	0.002	0
MG	Mertk	3.17591	0.698	0.092	2.31197	0.456	0.115	0
MG	Tnfrsf11a	1.40585	0.212	0.001	1.12134	0.11	0.001	0
MG	Rasa4	1.72743	0.238	0.004	1.55088	0.157	0.008	0
MG	Ctsc	1.4875	0.203	0.004	1.43951	0.127	0.004	0
MG	Rgs2	1.5973	0.205	0.006	1.62923	0.139	0.005	0
MG	Plcl2	2.54711	0.395	0.016	1.77969	0.191	0.016	0
MG	Tlr7	1.14887	0.149	0.001	1.15228	0.101	0.001	0
MG	Marcks	1.95013	0.414	0.067	2.12357	0.371	0.075	0
MG	Cd53	1.04768	0.134	0.001	1.08795	0.101	0.001	0
MG	Col27a1	2.269	0.455	0.059	2.25201	0.409	0.095	0
MG	Gsdmd	1.37707	0.175	0.003	1.39664	0.117	0.003	0
MG	Dapp1	1.97478	0.324	0.018	1.94884	0.244	0.03	0
MG	Traf3ip3	1.3029	0.16	0.002	1.26321	0.11	0.002	0
MG	Lacc1	1.58104	0.206	0.008	1.49683	0.163	0.01	0
MG	Lmo2	1.3327	0.177	0.007	1.4941	0.154	0.009	0
MG	Rab3il1	1.33833	0.181	0.004	1.3037	0.137	0.006	0
MG	Pmepa1	2.38731	0.435	0.042	1.98238	0.256	0.035	0
MG	Frmd4a	2.31536	0.673	0.236	1.90321	0.599	0.242	0
MG	Skil	1.99175	0.338	0.039	1.96727	0.261	0.039	0
MG	Pik3r5	1.23566	0.179	0.003	1.05292	0.106	0.003	0
MG	Serinc3	2.10308	0.474	0.088	2.05983	0.328	0.07	0
MG	Tcirg1	1.68763	0.297	0.042	1.8854	0.263	0.043	0
MG	Msn	1.61556	0.244	0.019	1.61103	0.175	0.016	0
MG	Pag1	2.41964	0.534	0.114	2.23569	0.37	0.096	0
MG	Plekho1	1.77119	0.309	0.018	1.70683	0.208	0.026	0
MG	Ctsd	2.38715	0.43	0.069	2.14225	0.325	0.069	0
MG	Cflar	2.15503	0.454	0.067	2.04672	0.32	0.068	0
MG	Nrros	1.19012	0.161	0.003	1.04306	0.104	0.004	0
MG	Itgb5	2.52136	0.427	0.037	1.9111	0.245	0.04	0
MG	Plek	1.71525	0.267	0.018	1.49676	0.147	0.012	0
MG	Whrn	1.99568	0.322	0.015	1.60158	0.18	0.019	0
MG	B4galt1	1.5021	0.242	0.008	1.22638	0.137	0.009	0
MG	Gpr183	1.29737	0.184	0.006	1.21627	0.11	0.005	0
MG	1700017B05Rik	1.3944	0.18	0.01	1.3835	0.137	0.009	0
MG	Rps6ka1	1.65225	0.281	0.032	1.54136	0.188	0.022	0
MG	Zfp710	2.28399	0.43	0.062	1.96928	0.26	0.049	0
MG	Mctp1	2.00055	0.293	0.021	1.5696	0.173	0.019	0
MG	Ntpcr	1.16229	0.168	0.008	1.25885	0.124	0.008	0
MG	St3gal6	2.18715	0.462	0.062	1.76256	0.285	0.058	0
MG	Elk3	1.62106	0.279	0.019	1.37885	0.163	0.018	0
MG	Nav3	2.47302	0.612	0.139	1.97034	0.418	0.134	0
MG	Sparc	2.02249	0.372	0.047	1.84786	0.256	0.048	0
MG	Fchsd2	2.3315	0.661	0.183	1.94125	0.51	0.21	0
MG	Inpp4b	2.43073	0.461	0.056	1.70327	0.224	0.038	0
MG	8030442B05Rik	1.82561	0.286	0.013	1.02344	0.114	0.007	0
MG	Gtf2h2	2.06767	0.423	0.075	1.77229	0.283	0.065	0
MG	P3h2	1.70138	0.274	0.011	1.05146	0.111	0.008	0
MG	Ifngr1	1.64728	0.263	0.024	1.43636	0.154	0.019	0
MG	Cfap74	1.46795	0.225	0.014	1.2838	0.128	0.014	0
MG	Atp8a2	2.29758	0.397	0.036	1.97225	0.196	0.036	0
MG	Trim30a	1.26524	0.169	0.007	1.22996	0.114	0.011	0
MG	Pros1	1.37906	0.235	0.021	1.16665	0.141	0.018	0
MG	Maml3	2.55681	0.501	0.092	1.68602	0.3	0.084	0
MG	Pald1	1.32539	0.212	0.014	1.20311	0.128	0.014	0
MG	Ehd4	1.39477	0.212	0.015	1.05818	0.107	0.009	0
MG	Camk1	1.92456	0.414	0.083	1.63934	0.266	0.069	0
MG	Nfatc1	1.32977	0.219	0.013	1.1859	0.118	0.012	0
MG	Fmnl3	1.45462	0.26	0.028	1.387	0.183	0.034	0
MG	Sh3pxd2a	1.32212	0.244	0.016	0.904338	0.123	0.014	0
MG	Rreb1	2.69278	0.459	0.034	1.75626	0.222	0.051	0
MG	Itga6	1.8319	0.344	0.037	1.68294	0.254	0.066	0
MG	Asph	1.86616	0.381	0.06	1.73434	0.26	0.073	0
MG	Scoc	1.74371	0.308	0.045	1.7415	0.185	0.045	0
MG	Cdk6	1.35743	0.198	0.015	1.15781	0.123	0.023	0
MG	Tgfbr2	1.95679	0.343	0.015	1.16831	0.171	0.046	0
MG	Tbc1d9	1.60693	0.266	0.02	1.00865	0.106	0.021	0
MG	Plxna4	1.84298	0.331	0.044	1.07174	0.158	0.047	0
MG	Lhfpl2	1.97971	0.363	0.047	1.21626	0.163	0.055	0
MG	Gm26778	1.20943	0.116	0.003	1.84858	0.146	0.003	9.72392e-308
MG	Ifngr2	1.11165	0.161	0.009	1.24165	0.149	0.019	7.96391e-304
MG	Parp14	1.15119	0.126	0.004	1.28467	0.117	0.004	5.22715e-302
MG	Arhgef6	1.38336	0.215	0.02	1.44416	0.17	0.019	2.46199e-301
MG	Basp1	1.69703	0.334	0.056	1.18483	0.172	0.057	3.93109e-301
MG	Nav2	2.48798	0.637	0.268	1.60675	0.488	0.259	9.53793e-301
MG	Tanc2	2.74144	0.653	0.32	2.23107	0.453	0.218	1.77829e-298
MG	Map3k5	1.31866	0.236	0.026	0.824442	0.116	0.019	1.18384e-297
MG	Baz1a	1.11479	0.151	0.008	1.1225	0.11	0.007	7.40349e-297
MG	Slc25a37	1.48411	0.232	0.025	1.49482	0.164	0.03	1.91056e-294
MG	Mbnl1	1.81779	0.758	0.442	2.20776	0.726	0.333	2.2419e-292
MG	Frrs1	1.30782	0.186	0.015	1.51506	0.146	0.018	1.90392e-287
MG	Rapgef5	2.27276	0.469	0.136	2.06922	0.264	0.063	5.12433e-280
MG	Numb	2.35847	0.583	0.239	1.927	0.385	0.177	1.48303e-279
MG	Evl	1.5652	0.308	0.052	1.41842	0.198	0.05	6.25845e-278
MG	Man2b1	1.70876	0.332	0.067	2.23756	0.385	0.072	1.73064e-274
MG	Sall1	1.78565	0.356	0.073	1.94205	0.286	0.058	1.40522e-272
MG	Fmnl1	1.03521	0.141	0.008	1.132	0.109	0.01	1.43488e-269
MG	Plgrkt	1.7612	0.327	0.061	1.85973	0.283	0.066	2.11574e-268
MG	Ski	1.72622	0.377	0.085	1.29297	0.2	0.065	1.39047e-267
MG	Rel	1.43592	0.225	0.027	1.1892	0.139	0.022	4.02931e-267
MG	B2m	1.29077	0.171	0.013	1.07338	0.106	0.017	5.79105e-265
MG	Cyfip1	1.82468	0.481	0.144	1.59851	0.321	0.123	1.08981e-259
MG	Slc36a1	1.50597	0.222	0.027	1.59094	0.196	0.028	1.27242e-259
MG	Ttc7	1.30546	0.212	0.024	1.22751	0.138	0.023	3.56182e-259
MG	Lrch1	2.00676	0.398	0.101	1.20786	0.174	0.072	6.27241e-259
MG	0610040J01Rik	1.45747	0.248	0.035	0.84165	0.112	0.031	9.31055e-258
MG	Vav2	1.13832	0.196	0.02	1.03102	0.13	0.025	1.53846e-256
MG	Eef2k	1.65207	0.303	0.054	1.2948	0.176	0.056	5.08124e-255
MG	Msh5	0.68092	0.103	0.004	1.83708	0.139	0.005	1.50902e-251
MG	Ptprj	1.93376	0.396	0.1	1.39112	0.191	0.076	1.85299e-251
MG	Ankrd44	1.94771	0.536	0.198	1.93147	0.373	0.117	5.94574e-251
MG	Rnf180	1.57701	0.299	0.053	0.755707	0.131	0.06	8.3277e-251
MG	Irak2	1.44896	0.302	0.054	1.01563	0.156	0.064	9.99241e-251
MG	Pla2g15	1.14468	0.17	0.015	1.23701	0.121	0.012	4.18292e-250
MG	Ptk2b	1.21645	0.21	0.025	0.854145	0.11	0.023	9.32002e-247
MG	Tubgcp5	1.87398	0.455	0.133	1.99961	0.378	0.104	2.84877e-246
MG	Coro1a	1.26732	0.149	0.011	1.30359	0.114	0.01	5.26146e-246
MG	Slc1a3	1.04035	0.516	0.361	2.22586	0.717	0.34	8.05386e-246
MG	Mknk1	1.49398	0.288	0.051	1.47205	0.206	0.047	2.85529e-243
MG	Lcp1	1.47982	0.286	0.05	1.5209	0.19	0.036	4.32509e-243
MG	Dock4	2.29376	0.631	0.332	1.76805	0.477	0.275	1.7923e-242
MG	Dusp6	1.346	0.162	0.014	1.37953	0.118	0.014	3.66052e-241
MG	Vrk2	1.40018	0.269	0.045	1.05667	0.135	0.033	1.09893e-240
MG	Tmsb4x	1.70312	0.633	0.275	1.99608	0.641	0.25	1.49965e-240
MG	Snx18	1.40709	0.261	0.042	1.2799	0.158	0.038	3.52563e-239
MG	Cacnb2	1.61243	0.264	0.044	1.26692	0.16	0.045	3.00268e-233
MG	Tpm3	1.79445	0.433	0.123	1.81748	0.343	0.107	1.1067e-231
MG	Daglb	1.46578	0.265	0.045	1.5955	0.194	0.039	4.86732e-231
MG	Wasf2	1.78222	0.414	0.12	1.47056	0.237	0.087	1.52093e-230
MG	Smap2	1.59524	0.331	0.074	1.32271	0.193	0.059	1.81027e-230
MG	Rrbp1	1.76056	0.485	0.157	1.69176	0.43	0.176	6.00738e-229
MG	Nrip1	1.75987	0.45	0.139	1.75361	0.334	0.115	3.27751e-227
MG	Tpst2	1.23613	0.19	0.022	1.13491	0.116	0.02	4.125e-226
MG	Gng2	1.26832	0.235	0.035	0.987631	0.138	0.034	1.76626e-225
MG	Capza2	1.68783	0.42	0.118	1.70824	0.329	0.109	2.50448e-225
MG	Ssh2	1.57052	0.67	0.419	2.19643	0.577	0.236	1.54825e-223
MG	Map3k14	1.22896	0.206	0.027	0.899623	0.106	0.031	1.44421e-222
MG	Neurl1a	1.09426	0.133	0.009	1.21153	0.117	0.009	3.85756e-222
MG	Gns	1.60053	0.333	0.075	1.44152	0.216	0.066	1.2846e-221
MG	Hps3	1.65985	0.372	0.095	1.77219	0.295	0.078	8.00183e-221
MG	Ints6l	1.84486	0.593	0.259	1.5957	0.474	0.237	1.3222e-218
MG	Gdi2	1.65318	0.455	0.142	1.84705	0.344	0.122	1.35046e-218
MG	Celf2	1.45592	0.577	0.215	1.47187	0.48	0.225	5.04176e-218
MG	Fam102b	1.03413	0.165	0.017	1.47164	0.177	0.019	5.78127e-212
MG	Cttnbp2nl	1.72134	0.389	0.112	1.81799	0.28	0.062	1.05989e-211
MG	Grn	1.33132	0.213	0.031	1.15143	0.125	0.031	7.38254e-208
MG	Pnpla7	1.54546	0.404	0.116	1.34595	0.248	0.104	5.2385e-207
MG	Sipa1l2	1.31553	0.248	0.045	1.05629	0.139	0.035	2.44918e-205
MG	Aim2	1.34118	0.257	0.048	1.3165	0.164	0.024	9.27535e-205
MG	Ctsz	1.23392	0.203	0.029	1.31629	0.154	0.025	2.22216e-204
MG	Ccnd3	1.69401	0.411	0.124	1.17512	0.183	0.061	1.99936e-203
MG	Cds1	1.10201	0.18	0.022	1.1536	0.118	0.013	7.51983e-202
MG	Txnip	1.38231	0.183	0.023	1.76936	0.172	0.017	4.74299e-201
MG	Cst3	1.69259	0.794	0.478	1.56739	0.717	0.47	7.22531e-200
MG	Sat1	1.24647	0.546	0.19	1.22827	0.564	0.254	4.43624e-198
MG	Dennd4a	1.95593	0.552	0.261	1.62144	0.375	0.181	1.25174e-197
MG	Chd9	1.5478	0.698	0.435	1.06042	0.536	0.419	1.19656e-196
MG	Rp2	1.14148	0.185	0.025	1.05419	0.105	0.025	7.85478e-194
MG	Ddx5	1.15945	0.935	0.821	1.13069	0.907	0.818	2.35123e-187
MG	Slc29a3	1.21135	0.204	0.032	1.40299	0.149	0.02	8.47041e-187
MG	Fam49b	1.77786	0.517	0.228	1.71765	0.347	0.159	1.8964e-186
MG	Arsb	1.67259	0.328	0.087	1.403	0.194	0.067	5.84187e-186
MG	Dock11	1.21052	0.23	0.042	0.789656	0.125	0.056	3.3675e-183
MG	Elmo1	1.64733	0.698	0.48	1.93918	0.529	0.25	8.81857e-182
MG	Cmtm6	0.960717	0.136	0.013	1.10541	0.1	0.013	1.85947e-180
MG	Dcakd	1.30451	0.236	0.045	1.32453	0.176	0.051	3.83803e-178
MG	Acer3	1.25229	0.263	0.056	1.08949	0.168	0.056	1.24682e-177
MG	Samhd1	1.47663	0.237	0.046	1.20902	0.147	0.048	4.27911e-176
MG	Ptpn1	1.38052	0.274	0.063	1.14321	0.147	0.052	1.31491e-175
MG	Ppm1h	1.67314	0.379	0.124	1.22845	0.19	0.073	4.63366e-174
MG	BC037034	1.04458	0.156	0.019	1.2356	0.15	0.026	2.08799e-173
MG	Tfe3	1.38009	0.202	0.034	1.2537	0.133	0.033	5.36474e-173
MG	Rcbtb2	1.27321	0.227	0.043	1.25209	0.146	0.036	6.99725e-173
MG	Pacsin2	1.02717	0.193	0.031	0.700551	0.109	0.038	1.42891e-172
MG	Camk2d	1.56093	0.446	0.163	1.37782	0.284	0.141	5.54388e-172
MG	Ccdc93	1.3333	0.253	0.055	1.09119	0.159	0.045	2.87123e-170
MG	Arhgap5	1.52857	0.642	0.37	1.42021	0.529	0.324	4.98705e-169
MG	Git2	1.6316	0.501	0.207	1.7704	0.429	0.164	1.80272e-168
MG	Nrp1	1.09259	0.195	0.032	1.00117	0.132	0.039	2.18713e-167
MG	Etv6	1.58438	0.341	0.104	1.01268	0.163	0.075	1.11162e-166
MG	Hps4	1.47849	0.331	0.093	1.18753	0.245	0.115	4.99144e-165
MG	Ubash3b	1.9827	0.472	0.211	1.29098	0.23	0.121	6.98416e-165
MG	Snx5	1.31836	0.265	0.063	1.38437	0.193	0.049	2.96738e-162
MG	Lpin2	1.36635	0.192	0.033	1.27491	0.144	0.04	2.61724e-161
MG	Myh9	1.37762	0.326	0.095	0.976655	0.163	0.067	1.02468e-159
MG	Tacc1	1.54619	0.446	0.177	1.40254	0.293	0.13	2.45148e-159
MG	Accs	1.211	0.152	0.021	1.38817	0.131	0.021	9.59405e-157
MG	Pycard	1.27108	0.123	0.013	1.61636	0.139	0.013	5.27791e-156
MG	Zfp652	1.5291	0.349	0.112	1.36129	0.222	0.077	7.92059e-156
MG	Rgl2	1.26	0.283	0.071	1.7687	0.285	0.078	7.61145e-155
MG	St3gal5	1.11208	0.211	0.042	0.992272	0.13	0.039	1.3178e-152
MG	Med12l	1.30769	0.292	0.079	0.936831	0.157	0.084	3.30412e-152
MG	Ptpre	1.51652	0.364	0.12	1.6521	0.291	0.1	1.98063e-151
MG	Nfatc2	0.87033	0.149	0.021	0.865725	0.101	0.015	2.59592e-151
MG	Plxnb2	1.02402	0.152	0.021	0.95248	0.118	0.025	3.43067e-151
MG	Abhd12	1.54601	0.369	0.128	1.4133	0.247	0.105	3.51344e-151
MG	Arrdc1	1.08672	0.122	0.013	1.22492	0.114	0.015	4.63434e-150
MG	Ldlrad4	2.79673	0.42	0.189	1.88495	0.197	0.101	1.49673e-148
MG	Macf1	1.07443	0.779	0.638	0.801725	0.63	0.537	7.96846e-147
MG	Ttc28	1.64085	0.391	0.149	1.12396	0.2	0.119	1.30218e-145
MG	Skap2	1.5103	0.468	0.205	1.73184	0.363	0.138	1.9135e-145
MG	Dhrs3	0.927021	0.142	0.019	0.91216	0.109	0.031	2.90837e-145
MG	Snx29	1.69737	0.529	0.295	1.46293	0.319	0.179	9.25575e-144
MG	Pdk1	1.03433	0.146	0.021	1.18504	0.145	0.036	3.40892e-142
MG	Itpr2	1.21742	0.399	0.141	0.977491	0.244	0.134	9.84634e-142
MG	Scamp2	1.36917	0.289	0.083	1.27711	0.19	0.063	6.98704e-141
MG	Acox3	1.18489	0.209	0.045	1.27502	0.159	0.041	7.29915e-139
MG	Rock2	1.44576	0.467	0.208	1.28579	0.314	0.171	1.04923e-138
MG	Camk1d	1.72618	0.388	0.158	1.00912	0.199	0.172	3.21125e-138
MG	Nuak1	1.38184	0.283	0.082	0.994429	0.134	0.04	1.64092e-137
MG	Btg2	1.22416	0.145	0.022	1.14535	0.11	0.025	6.31443e-137
MG	Prex1	1.20995	0.324	0.103	1.10739	0.219	0.109	4.48607e-135
MG	Myo1b	0.721999	0.113	0.016	1.0036	0.122	0.012	1.69498e-134
MG	Herc2	1.54728	0.519	0.277	1.50575	0.364	0.202	3.3772e-134
MG	Heatr5a	1.27972	0.273	0.078	1.1394	0.17	0.065	7.99498e-132
MG	Arid3b	1.06599	0.165	0.03	1.23121	0.13	0.024	1.0981e-130
MG	Nfkb1	1.28456	0.346	0.121	1.11702	0.196	0.093	3.39479e-129
MG	Csad	1.30745	0.244	0.064	1.13784	0.154	0.072	2.80452e-128
MG	Dtx4	0.87262	0.135	0.02	0.819654	0.103	0.026	4.9779e-128
MG	Slc4a7	1.24098	0.249	0.067	1.14709	0.178	0.063	1.52288e-127
MG	Ifnar2	0.990893	0.174	0.034	1.30122	0.173	0.042	2.05887e-126
MG	Lrmda	1.99203	0.353	0.135	0.832928	0.121	0.075	4.86573e-126
MG	Il6st	1.21645	0.257	0.072	0.814248	0.126	0.06	1.34465e-125
MG	Mtr	1.06921	0.201	0.045	1.15574	0.138	0.039	2.77831e-125
MG	Pid1	1.33816	0.374	0.134	0.575123	0.208	0.154	1.45082e-123
MG	Kif21b	1.293	0.337	0.12	1.00481	0.226	0.125	1.65244e-122
MG	Arhgap17	1.40228	0.38	0.152	1.45295	0.285	0.127	4.6314e-121
MG	Commd8	1.04277	0.151	0.027	1.2185	0.133	0.024	7.44577e-120
MG	Slc25a45	0.772306	0.11	0.016	1.1375	0.107	0.01	1.04954e-119
MG	Rap1gds1	1.48679	0.442	0.216	1.34788	0.25	0.123	3.26269e-119
MG	Lrp1	1.21669	0.405	0.16	0.994507	0.305	0.19	1.15629e-118
MG	Pwwp2a	1.35175	0.391	0.163	1.19249	0.27	0.137	4.04864e-116
MG	Plxdc2	1.63103	0.645	0.505	1.74729	0.516	0.304	1.98519e-115
MG	Sft2d1	1.25387	0.324	0.118	1.14959	0.216	0.109	2.70482e-115
MG	Morc3	1.25881	0.303	0.106	1.63332	0.337	0.128	7.94216e-111
MG	Gab2	1.60234	0.381	0.171	1.10918	0.161	0.095	1.14991e-110
MG	Fam91a1	1.18222	0.249	0.074	1.29008	0.194	0.064	1.37971e-110
MG	Zfp90	1.26277	0.233	0.065	1.19521	0.154	0.048	1.82971e-110
MG	Grk2	1.03408	0.166	0.035	0.938504	0.119	0.037	3.3092e-110
MG	Bmp2k	1.40299	0.419	0.201	1.30992	0.261	0.142	2.25142e-109
MG	Prcp	1.14976	0.187	0.044	1.33491	0.147	0.032	2.97157e-109
MG	Cebpz	1.36326	0.274	0.088	1.28478	0.206	0.083	5.50268e-109
MG	Fbrsl1	1.29015	0.31	0.113	1.09998	0.211	0.111	3.74148e-107
MG	Rap1b	0.984278	0.188	0.046	0.82829	0.119	0.042	2.24579e-106
MG	Syngr1	0.879998	0.162	0.034	0.927279	0.12	0.035	3.37695e-106
MG	P2rx7	1.34092	0.276	0.092	1.04363	0.164	0.071	1.91359e-105
MG	Tnfaip8	0.864604	0.142	0.027	0.704707	0.104	0.047	5.98488e-105
MG	Crlf3	1.36187	0.328	0.128	1.34517	0.252	0.118	2.52236e-102
MG	Arpc1b	1.17133	0.242	0.074	1.23222	0.186	0.066	4.62257e-102
MG	Rogdi	1.1251	0.174	0.04	1.43057	0.163	0.037	5.67693e-102
MG	Cacna1d	1.12725	0.225	0.066	0.634277	0.113	0.059	5.76563e-101
MG	Itpkb	0.969548	0.189	0.047	0.697032	0.118	0.056	8.31097e-101
MG	Cryl1	0.813926	0.14	0.028	1.02351	0.119	0.023	8.513e-98
MG	Fus	1.06324	0.716	0.545	0.877272	0.564	0.487	8.02574e-97
MG	Akr1b10	1.08363	0.145	0.03	1.23882	0.151	0.043	4.89838e-96
MG	Picalm	1.11326	0.644	0.481	1.15285	0.49	0.344	5.90467e-96
MG	Arhgef40	1.14685	0.244	0.077	1.14089	0.202	0.102	6.22072e-96
MG	Pkn1	1.23397	0.234	0.074	1.27465	0.191	0.066	2.24103e-95
MG	Cux1	1.34979	0.409	0.208	1.13615	0.264	0.162	1.9968e-94
MG	Abca1	1.26324	0.405	0.195	1.0352	0.257	0.162	2.67588e-94
MG	Gusb	1.06837	0.176	0.044	1.11152	0.141	0.048	3.85768e-94
MG	Jmjd1c	1.18251	0.576	0.392	0.970652	0.386	0.311	2.53678e-93
MG	Csnk1e	1.06367	0.227	0.07	1.07382	0.163	0.061	2.66798e-93
MG	Dock7	1.00996	0.201	0.055	0.80484	0.135	0.078	3.75308e-93
MG	Mapk14	1.1253	0.285	0.108	0.875137	0.148	0.07	1.12998e-91
MG	Aagab	0.928627	0.19	0.053	0.932607	0.124	0.04	2.51949e-89
MG	Asap1	1.27231	0.391	0.196	1.08858	0.244	0.164	2.36096e-88
MG	Soga1	1.24546	0.302	0.125	1.02954	0.167	0.08	1.14204e-87
MG	Clta	1.03921	0.269	0.099	0.804384	0.144	0.075	1.27942e-85
MG	Zfp36l2	1.19707	0.213	0.066	1.29822	0.187	0.08	1.31584e-85
MG	Usp8	1.05419	0.275	0.105	1.18423	0.195	0.088	1.10718e-82
MG	Tbc1d16	1.08439	0.264	0.101	0.971485	0.134	0.045	5.48865e-82
MG	Nek7	1.1723	0.341	0.159	0.858388	0.176	0.108	9.15141e-82
MG	Ctsb	1.23308	0.276	0.108	0.917188	0.166	0.091	1.50385e-81
MG	Rnpep	1.05019	0.199	0.061	0.915126	0.14	0.062	7.96679e-80
MG	Arl15	1.24785	0.299	0.126	0.617808	0.13	0.099	1.06667e-79
MG	Dclre1c	1.10051	0.162	0.044	1.13103	0.139	0.044	2.87051e-79
MG	Sipa1l1	1.06364	0.262	0.099	0.825728	0.149	0.085	3.56937e-79
MG	Man1a	0.979742	0.281	0.11	0.779795	0.142	0.06	1.19757e-78
MG	Swap70	0.904561	0.159	0.042	1.00228	0.136	0.056	1.72482e-78
MG	Senp2	1.13249	0.324	0.146	1.16007	0.23	0.117	1.4607e-77
MG	Rasgrp3	1.19322	0.378	0.193	1.10322	0.209	0.091	6.61427e-77
MG	Rptor	1.22322	0.352	0.177	1.23368	0.243	0.123	3.43409e-76
MG	Eml4	0.978065	0.25	0.095	0.842846	0.157	0.076	6.90706e-76
MG	Mgat1	0.852842	0.151	0.039	0.84796	0.103	0.037	7.31783e-76
MG	Snx13	1.06707	0.274	0.113	0.651252	0.131	0.085	1.24786e-75
MG	Extl3	1.02025	0.256	0.1	0.615953	0.133	0.082	1.42128e-75
MG	Erp29	1.01496	0.224	0.078	1.23085	0.182	0.063	1.87092e-75
MG	Jak1	0.972688	0.254	0.096	0.903925	0.17	0.089	2.08931e-75
MG	Cltc	1.17827	0.385	0.199	1.2282	0.301	0.169	5.55038e-75
MG	Tmcc3	1.3901	0.515	0.381	1.75958	0.421	0.25	1.16702e-74
MG	Kdm7a	0.933435	0.209	0.071	0.849769	0.123	0.06	1.39029e-72
MG	Large1	1.26318	0.359	0.187	0.871	0.186	0.14	2.99406e-72
MG	Rin2	1.04162	0.308	0.137	0.626026	0.159	0.117	1.25884e-71
MG	Bach1	0.889149	0.155	0.043	0.863419	0.121	0.047	3.48976e-71
MG	Rab8b	0.999757	0.231	0.088	0.682833	0.112	0.062	9.64875e-71
MG	Sf3b1	0.977835	0.633	0.466	0.954372	0.523	0.411	1.1824e-70
MG	Aftph	1.16276	0.317	0.149	1.12604	0.196	0.098	1.25639e-70
MG	Sec14l1	1.01384	0.246	0.097	0.924837	0.168	0.091	2.36444e-69
MG	Klf3	1.12757	0.3	0.136	0.927029	0.197	0.118	1.03939e-68
MG	Diaph2	1.34292	0.382	0.217	1.23039	0.242	0.15	2.16594e-68
MG	Cebpg	0.974174	0.174	0.054	1.03126	0.125	0.046	2.9225e-68
MG	Ralgps2	0.983093	0.251	0.097	0.857248	0.214	0.117	3.14352e-68
MG	Ptbp3	1.06331	0.263	0.111	1.0092	0.206	0.094	6.80477e-67
MG	Arpc2	1.064	0.24	0.096	0.911569	0.157	0.075	1.24137e-66
MG	Actr2	1.10338	0.332	0.162	1.09265	0.25	0.128	2.45457e-66
MG	Hexa	0.892729	0.172	0.055	0.827651	0.124	0.046	1.23574e-65
MG	Tln1	0.932305	0.182	0.06	0.916125	0.127	0.048	2.18356e-65
MG	Pan3	1.07826	0.487	0.325	1.14683	0.357	0.24	3.56299e-65
MG	Arhgap12	0.995821	0.29	0.132	0.895701	0.176	0.106	7.97975e-65
MG	Chic2	0.86896	0.187	0.062	0.678129	0.112	0.079	8.96024e-65
MG	Tsc22d4	1.07524	0.433	0.248	1.34299	0.43	0.252	1.0224e-63
MG	Irf2	1.07491	0.369	0.197	0.98255	0.243	0.152	1.13859e-63
MG	Clint1	0.898648	0.219	0.084	0.743719	0.126	0.065	1.15838e-63
MG	Pld1	1.12376	0.375	0.209	1.37662	0.277	0.128	2.49719e-63
MG	Pkig	0.886305	0.196	0.071	0.713647	0.11	0.048	2.71057e-63
MG	Capzb	0.946452	0.234	0.093	0.732574	0.134	0.072	4.43445e-63
MG	Ctsa	0.946956	0.185	0.063	1.21946	0.159	0.056	6.53688e-63
MG	Comt	1.00051	0.309	0.147	0.776044	0.206	0.131	8.75998e-63
MG	Mtus1	1.06537	0.376	0.203	0.893703	0.254	0.173	1.38049e-62
MG	Arpc4	0.878429	0.153	0.047	0.918283	0.112	0.04	3.59426e-62
MG	Fkbp15	1.04859	0.252	0.109	0.873989	0.128	0.075	2.12248e-61
MG	Nos1ap	0.993712	0.24	0.101	0.732957	0.135	0.077	2.58848e-61
MG	Nfya	0.954571	0.141	0.041	1.18613	0.116	0.029	1.20024e-60
MG	Mgat5	1.02932	0.339	0.179	0.533189	0.162	0.142	8.65857e-60
MG	Ywhah	1.02788	0.196	0.072	1.1825	0.175	0.068	1.72513e-59
MG	Ctc1	0.809735	0.126	0.035	1.01883	0.105	0.027	3.5151e-58
MG	Zcchc6	1.17748	0.332	0.173	1.0633	0.246	0.156	5.83657e-58
MG	Rbm39	0.629899	0.791	0.74	0.655312	0.657	0.634	2.43539e-57
MG	Atxn7l1	0.963018	0.238	0.103	0.794996	0.13	0.075	2.58745e-57
MG	Sfi1	1.17796	0.29	0.141	0.51033	0.113	0.088	1.01692e-56
MG	Zc3h7a	1.0385	0.327	0.169	1.24646	0.283	0.144	1.3719e-56
MG	Dhx9	1.00314	0.265	0.12	0.98592	0.19	0.114	3.66643e-56
MG	Parp8	1.02013	0.339	0.182	0.863838	0.237	0.173	3.79105e-56
MG	Wdr44	0.966203	0.232	0.099	0.790656	0.124	0.069	3.8177e-56
MG	Adam17	0.959384	0.219	0.09	0.833959	0.139	0.075	8.49248e-56
MG	Lims1	1.11319	0.312	0.165	0.691504	0.15	0.114	1.15937e-55
MG	Grb2	0.825572	0.219	0.091	0.560575	0.105	0.061	2.02323e-55
MG	Pts	1.04076	0.222	0.091	0.930386	0.173	0.094	2.74765e-55
MG	Ptp4a2	0.980613	0.266	0.124	0.770926	0.162	0.095	4.1848e-55
MG	Sbno2	0.895852	0.18	0.066	0.899974	0.126	0.052	1.60064e-54
MG	Gramd1a	0.916154	0.181	0.066	0.899521	0.157	0.077	1.81437e-54
MG	Arid1a	0.981083	0.365	0.207	0.830821	0.229	0.168	3.54327e-54
MG	Agmo	1.04367	0.302	0.153	0.706737	0.138	0.093	4.49762e-54
MG	Wsb1	0.907756	0.462	0.288	0.835195	0.385	0.314	1.99442e-53
MG	Acsl4	0.745683	0.162	0.057	0.654901	0.105	0.051	1.35833e-52
MG	Snx6	1.04228	0.283	0.141	1.07898	0.218	0.115	3.0999e-52
MG	Sfmbt1	0.81891	0.219	0.095	0.69593	0.122	0.065	6.16038e-52
MG	Man1a2	0.956079	0.274	0.134	1.21226	0.229	0.108	8.41986e-52
MG	Bhlhe41	0.945174	0.181	0.068	0.864806	0.111	0.055	1.7935e-51
MG	Arhgef1	1.01946	0.264	0.126	0.798348	0.198	0.136	6.73715e-51
MG	Ccni	0.860862	0.184	0.071	0.838186	0.122	0.068	3.23798e-50
MG	Eif4a2	1.05827	0.37	0.214	0.92655	0.329	0.222	4.99217e-50
MG	Clip1	0.825467	0.207	0.086	0.742886	0.141	0.081	9.68963e-50
MG	Htra2	1.02217	0.158	0.057	1.1816	0.161	0.061	1.0068e-49
MG	Stk4	0.79693	0.168	0.063	0.817623	0.108	0.042	4.13123e-49
MG	Gfm2	1.07795	0.264	0.131	1.19004	0.203	0.111	1.27493e-48
MG	Zmiz1	0.918987	0.341	0.191	0.845113	0.248	0.182	1.88685e-48
MG	Slc9a9	1.3995	0.41	0.281	0.977344	0.216	0.185	2.43474e-48
MG	Dgkd	0.924944	0.32	0.174	0.616855	0.171	0.13	3.52267e-48
MG	Naa35	0.938742	0.255	0.122	0.97807	0.199	0.116	3.61639e-48
MG	Osbpl11	0.818677	0.187	0.076	0.699976	0.11	0.061	9.93212e-48
MG	Helz	0.843544	0.263	0.126	0.700466	0.177	0.126	1.26785e-47
MG	Zufsp	0.954107	0.312	0.167	1.22468	0.273	0.148	1.31777e-47
MG	Kdm3b	0.919703	0.304	0.163	0.818682	0.185	0.125	1.48492e-47
MG	Hnrnph1	0.872669	0.566	0.427	0.808441	0.506	0.427	3.2318e-46
MG	Atp6v0a1	0.99829	0.327	0.189	0.690777	0.199	0.151	3.73792e-46
MG	Fcho2	0.941266	0.422	0.279	0.960032	0.325	0.238	1.16055e-45
MG	Agps	0.981972	0.288	0.156	0.854092	0.17	0.102	1.50876e-45
MG	Peli1	0.957465	0.26	0.132	0.661666	0.15	0.114	3.79853e-45
MG	Mtdh	0.943292	0.429	0.29	0.997059	0.31	0.225	8.23152e-45
MG	Gnai2	0.777043	0.194	0.082	0.624337	0.127	0.077	3.40059e-44
MG	Tmem55b	0.953828	0.192	0.082	1.07181	0.191	0.087	4.68154e-44
MG	AY036118	0.544478	0.874	0.87	0.50986	0.777	0.804	9.98944e-44
MG	Ulk2	0.941528	0.299	0.169	0.597106	0.147	0.124	2.34217e-43
MG	Cep68	0.821332	0.17	0.069	1.06214	0.165	0.069	4.0403e-43
MG	3222401L13Rik	0.995776	0.232	0.109	1.15956	0.205	0.096	4.21032e-43
MG	Pabpc1	0.968177	0.241	0.118	0.777053	0.162	0.11	8.1063e-43
MG	Tns3	0.891011	0.364	0.23	0.534047	0.185	0.16	1.11758e-42
MG	Psap	0.944585	0.444	0.301	0.882919	0.339	0.267	1.9301e-42
MG	Dnajc7	1.00187	0.359	0.224	1.0112	0.264	0.18	2.20491e-42
MG	Dnm2	0.949291	0.36	0.23	0.923068	0.224	0.162	1.23365e-41
MG	Map3k3	0.916893	0.246	0.128	0.638536	0.126	0.086	2.63713e-41
MG	Elf1	0.906337	0.255	0.133	0.876398	0.155	0.094	5.41096e-41
MG	Ddi2	0.801227	0.222	0.107	0.799546	0.142	0.084	7.5168e-41
MG	Cdk9	0.706199	0.126	0.044	0.851635	0.118	0.055	1.00598e-40
MG	Tmem135	0.900704	0.33	0.202	0.677188	0.18	0.151	1.37322e-40
MG	Cdc42	0.89968	0.298	0.169	0.893888	0.214	0.144	1.70701e-40
MG	2810474O19Rik	0.984087	0.262	0.136	1.21005	0.221	0.112	1.7861e-40
MG	Rnf169	0.755342	0.222	0.108	0.570044	0.111	0.071	1.19243e-39
MG	Celf1	0.973134	0.365	0.236	0.995645	0.266	0.186	2.56779e-39
MG	Slc12a6	0.976272	0.189	0.085	1.07563	0.178	0.083	5.02483e-39
MG	Fgd4	0.776603	0.214	0.1	0.678603	0.126	0.105	5.55372e-39
MG	Zfp715	0.701005	0.104	0.033	0.951182	0.101	0.03	7.239e-39
MG	Calm2	0.847923	0.411	0.273	0.840059	0.338	0.251	9.60983e-39
MG	Atp6v0a2	0.773429	0.177	0.078	0.845541	0.134	0.064	9.88069e-38
MG	Epb41	0.69872	0.162	0.067	0.533256	0.104	0.071	1.37195e-37
MG	Madd	0.859988	0.159	0.066	1.12431	0.176	0.076	2.35542e-37
MG	Washc4	0.854726	0.284	0.16	1.10451	0.25	0.142	4.51825e-37
MG	Rnf216	0.884671	0.347	0.225	0.840274	0.198	0.137	6.26848e-37
MG	Chd2	0.884593	0.458	0.336	0.883136	0.338	0.284	8.29136e-37
MG	Rpl10a	0.886844	0.19	0.088	0.993787	0.199	0.111	1.67782e-36
MG	Gm32036	0.903228	0.223	0.114	1.18858	0.17	0.074	1.90151e-36
MG	Sh3glb1	0.923497	0.312	0.189	0.695459	0.19	0.149	2.22846e-36
MG	Cerk	0.713273	0.252	0.135	0.541933	0.138	0.086	3.93836e-36
MG	Fam117b	0.829224	0.216	0.109	0.589075	0.109	0.07	8.11272e-36
MG	Ppp1r9a	0.888092	0.445	0.334	0.852425	0.346	0.271	1.9101e-35
MG	Tgs1	0.873395	0.206	0.102	1.09005	0.183	0.094	4.03899e-35
MG	Zfp36l1	0.800762	0.209	0.101	0.904505	0.191	0.112	1.02704e-34
MG	Stau1	0.832561	0.189	0.09	0.549535	0.101	0.071	1.04671e-34
MG	Srsf5	0.710806	0.635	0.554	0.708798	0.557	0.543	4.44932e-34
MG	Uvrag	0.809738	0.276	0.164	0.819442	0.165	0.11	1.47432e-33
MG	Btbd9	0.96811	0.329	0.218	0.520995	0.162	0.141	1.61665e-33
MG	Taok3	0.800105	0.242	0.134	0.731524	0.15	0.099	5.29926e-33
MG	Zbtb18	0.780722	0.13	0.053	1.01267	0.126	0.046	5.47302e-33
MG	P4ha1	0.835589	0.248	0.136	0.554808	0.188	0.16	1.55795e-32
MG	Snrk	0.870605	0.151	0.066	1.09804	0.148	0.072	1.68218e-32
MG	Arid4a	0.877263	0.279	0.166	0.717516	0.185	0.141	2.53785e-32
MG	Sec61g	0.774752	0.108	0.039	1.07669	0.112	0.042	2.85295e-32
MG	Strada	0.817845	0.19	0.094	0.604163	0.114	0.08	4.44879e-32
MG	Med13l	0.824787	0.318	0.206	0.625622	0.177	0.142	5.49437e-32
MG	Dennd1b	0.719294	0.187	0.09	0.642956	0.119	0.092	6.90016e-32
MG	Mafg	0.751915	0.207	0.105	0.72811	0.149	0.099	1.19573e-31
MG	Lgals8	0.761325	0.185	0.09	0.823419	0.123	0.075	1.36387e-31
MG	Fgfr1op	0.795325	0.139	0.059	0.93789	0.126	0.076	1.58758e-31
MG	Csf2ra	0.773864	0.138	0.058	0.88159	0.109	0.048	2.12345e-31
MG	Mfap3	0.715227	0.186	0.091	0.783044	0.118	0.064	2.47496e-31
MG	Malt1	0.678397	0.142	0.06	0.75479	0.107	0.056	2.52479e-31
MG	Usf2	0.702691	0.161	0.073	0.603012	0.11	0.07	2.77072e-31
MG	Pten	0.813063	0.315	0.201	0.792468	0.214	0.163	3.8313e-31
MG	Pip4k2a	0.916893	0.439	0.355	0.724164	0.224	0.196	1.01942e-30
MG	Dpy19l4	0.689487	0.196	0.099	0.593889	0.103	0.073	1.45019e-30
MG	Cln3	0.691289	0.141	0.06	0.807478	0.116	0.052	1.70845e-30
MG	Actb	0.999926	0.507	0.403	0.9857	0.453	0.345	4.1752e-30
MG	Ep300	0.791595	0.301	0.188	0.897806	0.215	0.151	5.64798e-30
MG	Srrm2	0.675012	0.617	0.557	0.504491	0.47	0.488	6.71986e-30
MG	Prkcb	0.843813	0.314	0.204	0.609149	0.152	0.116	8.12255e-30
MG	Nmt1	0.858358	0.23	0.127	0.84923	0.185	0.119	1.67571e-29
MG	Ccdc12	0.86773	0.217	0.117	0.798703	0.165	0.108	1.77363e-29
MG	Tbk1	0.755331	0.239	0.135	0.80621	0.167	0.119	5.05084e-29
MG	Rps9	0.871416	0.187	0.095	1.05791	0.184	0.096	5.52123e-29
MG	Rac1	0.790893	0.181	0.091	0.777123	0.15	0.089	7.37571e-29
MG	Gcn1l1	0.734803	0.19	0.097	0.851966	0.137	0.081	7.60654e-29
MG	Atp6v0b	0.891297	0.345	0.232	0.812992	0.39	0.323	1.00774e-28
MG	Nfxl1	0.786198	0.124	0.052	0.803598	0.108	0.052	1.18279e-28
MG	Rapgef6	0.946975	0.334	0.228	1.10164	0.252	0.164	1.45087e-28
MG	Kdm2b	0.678196	0.201	0.106	0.795077	0.141	0.079	1.67944e-28
MG	Ldb1	0.692647	0.16	0.076	0.882437	0.141	0.076	8.86886e-28
MG	B430010I23Rik	0.832698	0.27	0.164	0.938482	0.192	0.126	1.64349e-27
MG	Smg1	0.750997	0.369	0.259	0.886136	0.275	0.214	2.49074e-27
MG	Camta2	0.704003	0.139	0.062	0.654787	0.105	0.065	3.28481e-27
MG	Lyst	0.771446	0.258	0.155	0.621952	0.156	0.123	3.80841e-27
MG	Hsp90b1	0.759186	0.322	0.212	0.625549	0.29	0.235	6.86488e-27
MG	Mapre1	0.772996	0.143	0.066	0.719751	0.103	0.069	9.16359e-27
MG	Pla2g4a	0.704919	0.208	0.114	0.964813	0.144	0.067	9.73067e-27
MG	Tpp2	0.875425	0.28	0.177	1.02597	0.222	0.134	1.16527e-26
MG	Akap8l	0.791292	0.435	0.34	0.617982	0.306	0.289	2.48712e-26
MG	Phf14	0.760476	0.44	0.349	0.927355	0.343	0.276	6.68081e-26
MG	Ifnar1	0.722253	0.132	0.061	0.878836	0.143	0.082	6.37681e-25
MG	Gna13	0.531643	0.144	0.068	0.676473	0.11	0.077	9.35283e-25
MG	Slc8a1	1.21858	0.43	0.391	1.10739	0.222	0.177	1.88367e-24
MG	Dlgap4	0.629551	0.148	0.072	0.548953	0.108	0.072	1.99011e-24
MG	Atp2b1	0.725351	0.407	0.304	0.511793	0.285	0.261	2.69784e-24
MG	Ubl3	0.751232	0.254	0.158	0.637533	0.17	0.129	2.83262e-24
MG	Cep192	0.750248	0.148	0.073	0.703469	0.112	0.061	7.82839e-24
MG	Zrsr2	0.681966	0.174	0.092	0.538676	0.113	0.087	8.62777e-24
MG	Fbxw4	0.655207	0.168	0.089	0.683888	0.11	0.07	1.61215e-23
MG	Acp2	0.67087	0.116	0.051	0.815794	0.103	0.049	2.28598e-23
MG	Rab14	0.781834	0.308	0.209	0.923942	0.256	0.188	2.40105e-23
MG	Mkln1	0.687194	0.462	0.375	0.594005	0.305	0.308	6.38441e-23
MG	Tet3	0.722739	0.302	0.205	0.717411	0.207	0.141	7.46437e-23
MG	Adam15	0.623256	0.154	0.078	0.628322	0.152	0.107	1.43911e-22
MG	Tmem87b	0.703638	0.213	0.126	0.756517	0.138	0.096	1.57211e-22
MG	Dctn5	0.80626	0.147	0.074	0.858919	0.127	0.064	1.75674e-22
MG	Sgk1	0.685127	0.165	0.087	0.726247	0.103	0.062	2.42563e-22
MG	Ccnl1	0.707415	0.367	0.266	0.805057	0.3	0.24	2.79036e-22
MG	Rhoa	0.724204	0.19	0.108	0.751964	0.137	0.096	5.09779e-22
MG	Nisch	0.736037	0.489	0.401	0.749348	0.437	0.374	8.15212e-22
MG	Irf2bp2	0.695289	0.167	0.1	1.02644	0.177	0.095	1.32169e-21
MG	Bmyc	0.698076	0.152	0.078	0.70478	0.115	0.078	1.46602e-21
MG	Msl1	0.804066	0.196	0.114	0.75164	0.156	0.105	4.13177e-21
MG	Fau	1.02546	0.187	0.107	0.727434	0.15	0.11	5.85064e-21
MG	Stard9	0.786776	0.34	0.25	0.665026	0.236	0.187	6.0501e-21
MG	Tbc1d14	0.702571	0.219	0.136	0.620522	0.137	0.089	8.619e-21
MG	Tpcn1	0.616483	0.163	0.088	0.583669	0.127	0.089	1.13965e-20
MG	Irak1	0.697595	0.146	0.076	0.863328	0.125	0.064	1.27986e-20
MG	Mlxip	0.641826	0.162	0.089	0.567719	0.112	0.069	2.30496e-20
MG	Foxp1	0.821329	0.327	0.24	0.629666	0.175	0.151	3.95065e-20
MG	Tyk2	0.661921	0.149	0.079	0.655327	0.106	0.065	4.86535e-20
MG	Sppl2a	0.678114	0.186	0.107	0.649332	0.123	0.077	4.99281e-20
MG	Ufsp2	0.731032	0.147	0.078	0.895788	0.14	0.084	7.44941e-20
MG	Gtpbp2	0.716043	0.203	0.122	0.521518	0.13	0.112	8.6239e-20
MG	Rsbn1l	0.610876	0.2	0.119	0.538044	0.152	0.13	3.12436e-19
MG	Ranbp10	0.724497	0.186	0.111	0.739241	0.146	0.092	6.38637e-19
MG	Gnaq	0.738372	0.416	0.357	0.563018	0.23	0.232	8.16854e-19
MG	Setd2	0.774818	0.332	0.251	0.508034	0.197	0.191	1.08752e-18
MG	Hnrnpul1	0.609181	0.192	0.115	0.742654	0.15	0.085	1.13272e-18
MG	Actr3	0.706193	0.219	0.142	0.593037	0.142	0.102	1.76738e-18
MG	Wdr26	0.598251	0.321	0.236	0.751271	0.232	0.187	1.08042e-17
MG	Gmpr2	0.601617	0.12	0.06	0.81341	0.12	0.069	1.13062e-17
MG	Exoc6	0.55751	0.172	0.102	0.709361	0.12	0.061	3.3945e-17
MG	Cntrl	0.754371	0.246	0.168	0.727538	0.18	0.139	4.04573e-17
MG	Ddx6	0.749325	0.276	0.199	0.769622	0.203	0.144	4.9446e-17
MG	Trim26	0.537008	0.125	0.07	0.826372	0.124	0.062	5.80658e-17
MG	Itm2b	0.68089	0.416	0.344	0.722785	0.337	0.294	6.3519e-17
MG	Ppt1	0.67759	0.248	0.166	0.60279	0.176	0.134	7.37042e-17
MG	Zbtb4	0.54886	0.133	0.07	0.615847	0.11	0.073	7.95539e-17
MG	Tardbp	0.635169	0.316	0.24	0.870238	0.312	0.23	1.22667e-16
MG	Abi1	0.586435	0.305	0.223	0.680161	0.21	0.18	1.231e-16
MG	Hnrnpa3	0.688116	0.39	0.309	0.699404	0.364	0.318	1.5496e-16
MG	Cnot2	0.652515	0.306	0.232	0.608032	0.177	0.164	1.56777e-16
MG	Vps13c	0.70751	0.343	0.267	0.678607	0.244	0.211	1.65182e-16
MG	Supt20	0.716846	0.341	0.264	0.616953	0.282	0.257	1.84862e-16
MG	Hltf	0.632016	0.319	0.237	0.543237	0.249	0.218	2.98722e-16
MG	Capza1	0.566115	0.201	0.129	0.709399	0.139	0.093	4.14056e-16
MG	Arpc3	0.532778	0.112	0.057	0.556748	0.1	0.058	6.37597e-16
MG	Pak2	0.617034	0.236	0.159	0.550199	0.157	0.132	6.86627e-16
MG	Wdfy2	0.561885	0.285	0.208	0.607943	0.152	0.123	8.96259e-16
MG	Nsd1	0.561028	0.508	0.461	0.566342	0.33	0.337	9.45953e-16
MG	Dip2b	0.641025	0.429	0.375	0.531315	0.238	0.25	2.75822e-15
MG	Smchd1	0.603667	0.28	0.203	0.709396	0.174	0.153	2.92257e-15
MG	Rnf111	0.623393	0.211	0.14	0.587424	0.15	0.119	3.19859e-15
MG	Tor1aip1	0.595391	0.211	0.138	0.763911	0.154	0.106	4.02009e-15
MG	Rpl21	0.682436	0.177	0.11	0.563637	0.15	0.121	4.06122e-15
MG	Tbc1d23	0.682902	0.26	0.185	0.71238	0.189	0.153	6.26513e-15
MG	Stx7	0.573853	0.181	0.115	0.597332	0.137	0.097	1.13975e-14
MG	Rsrc2	0.701196	0.396	0.333	0.506372	0.287	0.293	1.42008e-14
MG	Arhgap39	0.644975	0.34	0.274	0.566786	0.157	0.136	1.64384e-14
MG	Brd7	0.693734	0.164	0.101	0.771335	0.145	0.096	1.76593e-14
MG	Rnf167	0.585867	0.151	0.089	0.695742	0.135	0.088	2.09631e-14
MG	Bnip2	0.608825	0.153	0.093	0.716285	0.124	0.082	5.26654e-14
MG	Dido1	0.60497	0.268	0.193	0.650996	0.196	0.175	7.72064e-14
MG	Slf2	0.544615	0.245	0.174	0.547825	0.152	0.13	8.1587e-14
MG	Tab2	0.603126	0.273	0.202	0.64076	0.181	0.15	1.51932e-13
MG	Wdfy3	0.626684	0.349	0.288	0.521551	0.203	0.2	1.6938e-13
MG	Rpl10	0.554045	0.123	0.069	0.569009	0.11	0.078	1.72272e-13
MG	Sdccag8	0.576445	0.25	0.181	0.637719	0.165	0.133	2.15367e-13
MG	Zfx	0.642574	0.166	0.106	0.565598	0.105	0.077	2.20999e-13
MG	Hdlbp	0.610558	0.209	0.142	0.560657	0.155	0.13	2.21373e-13
MG	Mvb12b	0.574223	0.257	0.191	0.570154	0.139	0.117	2.85685e-13
MG	Xiap	0.601546	0.259	0.19	0.752605	0.201	0.152	6.47153e-13
MG	Slmap	0.571982	0.228	0.163	0.704336	0.139	0.103	8.93464e-13
MG	P2rx4	0.574338	0.151	0.094	0.733611	0.13	0.074	1.5563e-12
MG	Fndc3a	0.582271	0.241	0.176	0.527571	0.153	0.135	2.05618e-12
MG	Prpf38b	0.651784	0.274	0.207	0.781698	0.234	0.169	2.52063e-12
MG	Creb1	0.673123	0.259	0.197	0.522146	0.136	0.131	3.104e-12
MG	Ube2d3	0.62089	0.356	0.288	0.673782	0.3	0.262	3.28848e-12
MG	Khdrbs1	0.60735	0.203	0.142	0.790343	0.162	0.115	5.29435e-12
MG	Eif3a	0.602272	0.207	0.145	0.577153	0.146	0.122	5.92204e-12
MG	Tmf1	0.520291	0.118	0.068	0.583644	0.1	0.067	5.94864e-12
MG	Mia2	0.567902	0.243	0.178	0.648255	0.177	0.151	7.01858e-12
MG	Snx2	0.593479	0.194	0.135	0.617736	0.137	0.098	1.17958e-11
MG	Ssbp1	0.60827	0.228	0.163	0.770793	0.217	0.17	1.2312e-11
MG	Dmtf1	0.575952	0.289	0.228	0.817011	0.276	0.214	3.36838e-11
MG	Zfp292	0.539717	0.315	0.253	0.624927	0.196	0.183	5.78914e-11
MG	Ncbp3	0.532979	0.146	0.093	0.645927	0.122	0.087	6.73182e-11
MG	Tra2b	0.595199	0.355	0.301	0.679565	0.321	0.266	7.83335e-11
MG	Dpp8	0.584883	0.198	0.14	0.591171	0.158	0.119	1.26997e-10
MG	Slc38a9	0.611811	0.31	0.252	0.661984	0.237	0.204	1.40572e-10
MG	Ikbkb	0.647934	0.254	0.192	0.65664	0.203	0.173	1.42383e-10
MG	Fbxl20	0.617616	0.221	0.165	0.564291	0.127	0.114	1.77549e-10
MG	0610037L13Rik	0.589104	0.139	0.09	0.540737	0.109	0.093	3.30577e-10
MG	Tpp1	0.522302	0.134	0.085	0.626984	0.117	0.087	4.04982e-10
MG	Npc2	0.55088	0.13	0.083	0.594252	0.103	0.066	1.09739e-09
MG	Synj1	0.515882	0.235	0.178	0.566107	0.209	0.189	1.16619e-09
MG	Nars	0.522142	0.189	0.134	0.5	0.15	0.141	1.2922e-09
MG	Rhob	0.521653	0.177	0.123	0.694602	0.135	0.094	1.45993e-09
MG	Ubap2l	0.569019	0.347	0.299	0.625853	0.282	0.254	7.52366e-09
MG	Selenop	0.529035	0.18	0.139	0.691091	0.164	0.112	9.89294e-09
MG	Rpl8	0.65824	0.131	0.087	0.564889	0.106	0.084	2.39114e-08
MG	6030458C11Rik	0.56229	0.101	0.064	0.652505	0.121	0.086	5.71036e-08
MG	Atpif1	0.562869	0.128	0.086	0.550357	0.103	0.074	5.86409e-08
MG	Eef2	0.544896	0.123	0.082	0.567505	0.105	0.081	6.05715e-08
MG	Top1	0.563681	0.359	0.316	0.605361	0.307	0.28	8.21215e-08
MG	Rpl18a	0.666947	0.121	0.081	0.588282	0.103	0.073	1.05365e-07
MG	Safb2	0.559536	0.251	0.203	0.581602	0.179	0.154	3.02829e-07
MG	Syncrip	0.530673	0.212	0.165	0.635808	0.171	0.134	3.11401e-07
MG	Rpl6	0.538403	0.265	0.214	0.58697	0.245	0.216	3.52987e-07
MG	Rps8	0.57497	0.182	0.142	0.811432	0.192	0.146	4.50512e-07
MG	Zfp106	0.508102	0.16	0.118	0.560638	0.116	0.095	5.79807e-07
MG	Spopl	0.501878	0.164	0.124	0.628998	0.123	0.084	7.38435e-07
MG	Rpl19	0.560172	0.152	0.114	0.510436	0.123	0.122	6.74445e-06
MG	Ddx3y	0.512154	0.218	0.179	0.569794	0.17	0.156	9.97677e-06
MG	Rpl23	0.529913	0.113	0.08	0.558219	0.103	0.081	1.90628e-05
MG	Rps11	0.579311	0.1	0.07	0.530303	0.101	0.074	2.92418e-05
MG	1700020I14Rik	0.508024	0.153	0.131	0.669834	0.152	0.118	4.96231e-05
MG	Eef1a1	0.61199	0.25	0.216	0.743406	0.227	0.199	5.11859e-05
MG	Rps3a1	0.504825	0.108	0.078	0.503134	0.102	0.088	6.79481e-05
MG	Tnpo3	0.516427	0.227	0.202	0.692325	0.163	0.144	0.000848355
MG	Rpl18	0.630573	0.107	0.082	0.562384	0.103	0.087	0.00125888
MG	Rpl13	0.637302	0.209	0.186	0.509467	0.188	0.187	0.00428405
NEU	Sntg1	3.01667	0.479	0.012	2.50515	0.356	0.011	0
NEU	3110035E14Rik	2.0271	0.379	0.018	1.73339	0.254	0.013	0
NEU	Kcnb2	2.87492	0.3	0.01	2.87337	0.239	0.009	0
NEU	Kcnq5	2.30521	0.281	0.013	2.03177	0.191	0.011	0
NEU	Rims1	1.97059	0.366	0.017	1.48858	0.229	0.011	0
NEU	Khdrbs2	2.41396	0.454	0.012	2.14163	0.35	0.01	0
NEU	Map2	1.71207	0.691	0.244	1.4987	0.59	0.242	0
NEU	Unc80	1.61024	0.305	0.013	1.51097	0.236	0.013	0
NEU	Neu4	2.2711	0.379	0.007	2.1723	0.305	0.008	0
NEU	Dpp10	1.90444	0.301	0.007	1.34587	0.185	0.008	0
NEU	Thsd7b	2.41671	0.285	0.007	2.5451	0.238	0.006	0
NEU	Brinp3	3.40942	0.614	0.068	2.91612	0.517	0.089	0
NEU	Ralgps2	1.56144	0.374	0.055	1.75928	0.367	0.065	0
NEU	Tnr	4.13031	0.635	0.036	3.35835	0.493	0.031	0
NEU	Gm38039	0.908137	0.115	0.001	1.63925	0.17	0.002	0
NEU	Kcnh7	2.84095	0.274	0.024	2.85122	0.245	0.022	0
NEU	Scn3a	1.72158	0.331	0.007	1.78358	0.279	0.008	0
NEU	Scn1a	1.33335	0.235	0.011	1.3372	0.181	0.008	0
NEU	Snhg11	4.59237	0.398	0.051	4.91807	0.494	0.058	0
NEU	Myt1	2.20837	0.41	0.004	2.04015	0.3	0.005	0
NEU	Gria3	2.15579	0.401	0.021	1.89316	0.287	0.022	0
NEU	Tenm1	2.07453	0.35	0.008	1.74772	0.235	0.012	0
NEU	C230004F18Rik	1.7889	0.329	0.014	2.00336	0.303	0.014	0
NEU	Gria2	1.93417	0.951	0.255	1.57263	0.919	0.302	0
NEU	Col11a1	1.80074	0.329	0.011	2.02525	0.317	0.019	0
NEU	Cxxc4	1.35902	0.193	0.009	1.53732	0.209	0.014	0
NEU	Mmp16	2.38164	0.493	0.039	1.8653	0.328	0.048	0
NEU	Nkain3	1.91623	0.298	0.006	1.47939	0.195	0.007	0
NEU	Plppr1	1.65119	0.3	0.009	1.25649	0.177	0.007	0
NEU	Brinp1	2.0358	0.368	0.015	1.47016	0.227	0.012	0
NEU	Elavl4	1.47994	0.28	0.015	1.38631	0.211	0.014	0
NEU	Epb41	1.34348	0.301	0.029	1.30399	0.249	0.031	0
NEU	Rap1gap	1.77547	0.356	0.035	1.87359	0.337	0.048	0
NEU	Reln	3.5334	0.221	0.016	3.72663	0.274	0.023	0
NEU	Lhfpl3	4.02187	0.388	0.046	2.79422	0.272	0.038	0
NEU	Dpp6	2.69713	0.544	0.03	2.30058	0.417	0.029	0
NEU	Pdgfra	3.02591	0.559	0.031	2.93556	0.477	0.034	0
NEU	Miat	1.37793	0.232	0.01	1.63909	0.238	0.015	0
NEU	Cit	1.98445	0.33	0.013	2.06587	0.331	0.028	0
NEU	Srrm3	1.27822	0.217	0.004	1.33008	0.191	0.005	0
NEU	Nxph1	3.39643	0.393	0.013	2.38969	0.255	0.01	0
NEU	Ptprz1	2.10591	0.694	0.193	1.57391	0.636	0.269	0
NEU	Ndnf	2.44324	0.195	0.02	2.71433	0.255	0.021	0
NEU	Lrrtm4	3.61249	0.461	0.025	2.77194	0.319	0.018	0
NEU	Fam19a1	2.09827	0.347	0.012	1.84554	0.242	0.011	0
NEU	Ppfibp1	2.34508	0.425	0.023	2.13175	0.32	0.024	0
NEU	Nav2	1.38927	0.627	0.23	1.52172	0.547	0.212	0
NEU	Fam189a1	1.22071	0.202	0.005	1.12565	0.157	0.005	0
NEU	Ntrk3	2.16411	0.452	0.036	1.63854	0.303	0.05	0
NEU	Mir9-3hg	2.32329	0.502	0.043	1.92448	0.399	0.086	0
NEU	Grm5	2.3882	0.422	0.035	1.76426	0.257	0.026	0
NEU	Sox6	2.68266	0.518	0.072	1.94312	0.411	0.114	0
NEU	Xylt1	2.86797	0.451	0.058	2.1481	0.362	0.092	0
NEU	Kcnq1ot1	1.62322	0.815	0.446	1.66409	0.755	0.349	0
NEU	Ahi1	1.56536	0.555	0.189	1.5586	0.531	0.187	0
NEU	Pcdh15	2.83948	0.619	0.216	2.50889	0.497	0.153	0
NEU	Fam155a	3.28053	0.429	0.017	2.86522	0.281	0.012	0
NEU	Mcf2l	1.43343	0.256	0.011	1.41522	0.223	0.021	0
NEU	Nrg1	2.45687	0.292	0.015	2.7742	0.254	0.027	0
NEU	Sgcz	2.49187	0.343	0.011	1.96798	0.225	0.005	0
NEU	Cacna1a	1.96539	0.437	0.039	1.55474	0.299	0.039	0
NEU	Cdh13	2.02812	0.37	0.016	1.71591	0.255	0.016	0
NEU	Erc2	2.1072	0.384	0.023	1.97135	0.277	0.026	0
NEU	Cacna2d3	1.69402	0.321	0.018	1.61251	0.246	0.028	0
NEU	Nrg3	3.27543	0.394	0.016	2.83454	0.261	0.009	0
NEU	3632451O06Rik	1.63291	0.329	0.033	1.51173	0.228	0.014	0
NEU	Mir124a-1hg	1.5886	0.226	0.003	1.6484	0.226	0.004	0
NEU	Igsf9b	1.62141	0.3	0.039	1.69051	0.275	0.032	0
NEU	Opcml	3.05165	0.779	0.285	3.26648	0.719	0.147	0
NEU	Cspg4	2.31793	0.451	0.029	2.24945	0.361	0.024	0
NEU	Tpm1	1.7516	0.43	0.089	1.77689	0.369	0.089	0
NEU	Unc13c	1.89382	0.35	0.02	1.72858	0.255	0.019	0
NEU	Cacna2d2	1.92174	0.197	0.006	2.06709	0.222	0.012	0
NEU	Arpp21	2.41157	0.497	0.032	2.43832	0.439	0.053	0
NEU	Bcl11a	1.68344	0.196	0.016	1.88798	0.22	0.014	0
NEU	5730522E02Rik	1.39351	0.193	0.007	1.2264	0.163	0.007	0
NEU	Epn2	1.88913	0.687	0.421	1.94054	0.604	0.286	0
NEU	Car10	2.12259	0.271	0.008	1.92782	0.203	0.013	0
NEU	Cacng4	2.2218	0.377	0.007	1.81149	0.253	0.01	0
NEU	Adarb2	3.00446	0.468	0.027	2.37105	0.325	0.033	0
NEU	Vcan	3.42895	0.609	0.03	2.87297	0.463	0.034	0
NEU	Myt1l	2.13391	0.403	0.016	1.98209	0.301	0.015	0
NEU	Lrfn5	1.79723	0.308	0.011	1.3406	0.189	0.006	0
NEU	Nrxn3	3.45918	0.466	0.035	2.50297	0.308	0.042	0
NEU	Unc79	1.56077	0.33	0.014	1.25226	0.218	0.018	0
NEU	Meg3	4.36665	0.726	0.04	4.43436	0.665	0.038	0
NEU	Ptprn2	1.58712	0.292	0.007	1.30008	0.192	0.014	0
NEU	Pdzd2	2.41118	0.432	0.02	2.2533	0.353	0.023	0
NEU	Trio	1.69873	0.496	0.084	1.57071	0.414	0.099	0
NEU	Rims2	1.96686	0.534	0.109	1.71537	0.386	0.081	0
NEU	Samd12	1.54314	0.312	0.026	1.35192	0.235	0.021	0
NEU	Pdzrn4	1.39383	0.254	0.005	1.17662	0.163	0.005	0
NEU	Lsamp	2.57433	0.8	0.346	1.32564	0.69	0.311	0
NEU	Dscam	3.41827	0.425	0.051	2.8848	0.331	0.062	0
NEU	Kcnh8	1.56049	0.271	0.003	1.31409	0.171	0.004	0
NEU	Ptprs	1.93703	0.641	0.147	1.86948	0.604	0.16	0
NEU	Nrxn1	2.3467	0.941	0.279	1.63848	0.914	0.314	0
NEU	Zeb1	2.29205	0.61	0.104	1.71221	0.477	0.14	0
NEU	Gpr17	1.64273	0.276	0.021	1.69568	0.244	0.024	0
NEU	Slc1a1	1.62046	0.312	0.011	1.71652	0.246	0.011	0
NEU	4430402I18Rik	1.80764	0.304	0.009	2.20006	0.298	0.012	0
NEU	Stk32a	1.43718	0.253	0.002	1.08151	0.139	0.002	0
NEU	Gm20642	0.819276	0.157	0.001	0.787133	0.137	0.001	0
NEU	Clstn2	2.57338	0.222	0.012	2.45607	0.2	0.018	0
NEU	Celf4	1.61175	0.271	0.03	1.54619	0.242	0.031	0
NEU	Sorbs2	1.74328	0.403	0.035	1.48458	0.319	0.062	0
NEU	Fat3	2.31382	0.435	0.059	2.18696	0.352	0.085	0
NEU	Fchsd2	1.49876	0.584	0.147	1.33142	0.504	0.169	0
NEU	Mgat5b	1.32033	0.237	0.003	1.02639	0.151	0.004	0
NEU	Plekha6	1.19467	0.231	0.006	1.00428	0.166	0.008	0
NEU	Fam19a2	2.09107	0.286	0.008	1.03862	0.148	0.004	0
NEU	Pid1	1.86239	0.491	0.084	1.66242	0.387	0.102	0
NEU	Kcnc2	1.40971	0.157	0.006	1.4298	0.152	0.005	0
NEU	Epha3	1.29041	0.136	0.005	1.40314	0.156	0.006	0
NEU	A930009A15Rik	1.13756	0.172	0.001	1.17357	0.136	0.002	0
NEU	Ica1	1.14743	0.23	0.011	1.05911	0.177	0.011	0
NEU	Spon1	1.90005	0.377	0.023	1.5147	0.249	0.037	0
NEU	Tro	1.2117	0.203	0.018	1.37824	0.206	0.021	0
NEU	Cntn5	1.87921	0.134	0.007	1.85862	0.153	0.007	0
NEU	Nmnat2	1.49874	0.289	0.011	1.02874	0.16	0.008	0
NEU	Ugdh	1.44422	0.304	0.052	1.50728	0.284	0.052	0
NEU	Susd4	1.12154	0.206	0.006	1.04942	0.152	0.007	0
NEU	Gabrb3	1.49622	0.285	0.018	1.13922	0.192	0.017	0
NEU	Eln	1.07831	0.138	0.007	1.40873	0.174	0.013	0
NEU	Megf11	1.75286	0.299	0.011	1.21714	0.168	0.011	0
NEU	Cacna1e	1.4303	0.26	0.014	1.19828	0.179	0.014	0
NEU	Gpr158	1.59542	0.281	0.018	1.43066	0.193	0.019	0
NEU	D430041D05Rik	1.06681	0.178	0.006	1.07202	0.151	0.007	0
NEU	Chl1	1.71799	0.342	0.021	1.32655	0.23	0.032	0
NEU	Tacc2	1.16372	0.208	0.011	1.05896	0.152	0.007	0
NEU	Scn2a	1.34342	0.304	0.038	1.2588	0.23	0.031	0
NEU	Lrrc7	2.12731	0.362	0.013	1.47036	0.207	0.025	0
NEU	Cacna1c	1.65344	0.42	0.107	1.42866	0.283	0.056	0
NEU	Usp29	1.12922	0.169	0.005	1.17684	0.147	0.007	0
NEU	Tshz2	1.58432	0.308	0.021	1.36067	0.228	0.032	0
NEU	Cadps	1.3056	0.443	0.126	1.33595	0.328	0.077	0
NEU	Gucy1a2	1.44183	0.284	0.019	1.26485	0.207	0.025	0
NEU	Nrg3os	0.67737	0.137	0	0.673667	0.12	0.001	0
NEU	Pcsk2	1.50136	0.309	0.036	1.33212	0.212	0.027	0
NEU	Hs6st3	1.91276	0.166	0.004	1.72776	0.13	0.004	0
NEU	Hecw1	1.12258	0.171	0.005	1.00185	0.143	0.006	0
NEU	Arhgap31	2.04406	0.461	0.072	1.65397	0.315	0.077	0
NEU	Dpysl3	1.14684	0.229	0.009	1.02793	0.175	0.016	0
NEU	Prkg2	1.06723	0.173	0.002	1.00703	0.116	0.001	0
NEU	Shc4	1.33535	0.227	0.019	1.2209	0.153	0.01	0
NEU	4921534H16Rik	0.860606	0.111	0.001	1.01324	0.12	0.002	0
NEU	Kcnd3	1.37421	0.268	0.024	1.18244	0.178	0.018	0
NEU	Hs3st5	1.19632	0.115	0.002	1.17919	0.116	0.002	0
NEU	Kcnip1	1.17383	0.199	0.003	0.945637	0.14	0.007	0
NEU	Fnbp1l	1.24754	0.242	0.025	1.34421	0.22	0.033	0
NEU	Csmd1	3.78405	0.48	0.055	2.35095	0.319	0.084	0
NEU	Syt1	1.84435	0.274	0.057	1.75309	0.259	0.051	0
NEU	Mmp15	1.07189	0.16	0.01	1.23782	0.152	0.011	0
NEU	S100a3	1.05911	0.162	0.001	1.03389	0.119	0.003	0
NEU	Neto1	1.16971	0.204	0.005	0.749604	0.123	0.004	0
NEU	Gm16183	0.925701	0.139	0.006	1.04043	0.145	0.009	0
NEU	Ptprg	2.07311	0.435	0.045	1.3547	0.301	0.073	0
NEU	Stxbp5l	1.33364	0.271	0.024	1.09992	0.185	0.022	0
NEU	Rbfox1	3.2171	0.357	0.037	2.45119	0.201	0.03	0
NEU	Sgcd	2.58471	0.323	0.012	1.76418	0.174	0.02	0
NEU	Cspg5	1.74701	0.576	0.144	1.44275	0.517	0.214	0
NEU	Grin3a	1.79591	0.348	0.028	1.28114	0.217	0.035	0
NEU	Calcrl	1.30652	0.233	0.018	1.132	0.162	0.015	0
NEU	Slc35f1	2.47618	0.374	0.019	1.51049	0.228	0.041	0
[truncated: 864 more rows]
