# Supplementary material for: Beyond Quiescent and Active: Intermediate Microglial Transcriptomic States in a Mouse Model of Down Syndrome
Source: Int J Mol Sci. 2024 Mar 14;25(6):3289. doi: 10.3390/ijms25063289 (PMC10970051; doi:10.3390/ijms25063289)
Supplement: Supplementary file 1 [file ijms-25-03289-s001.zip › Supplementary Table S3.xlsx]

## Sheet: Sheet1
Supplementary Table 3. Markers of homeostatic and reactive microglia.
Markers of Cluster 0 or homeostatic microglia	Markers of Cluster 1 or reactive microglia
Csmd3	Ifi203
Plxdc2	Arhgap15
Nav2	Mndal
Nav3	F13a1
Frmd4a	Mrc1
Lhfpl2	F630028O10Rik
Tgfbr1	Dab2
Hexb	Clec2d
Rapgef5	H2-K1
Capn3	Csmd3
Col27a1	Ms4a7
Sall1	H2-D1
Selplg	Cmah
Gtf2h2	Itsn1
Sparc	Srgap2
Numb	Sp100
Tanc2	Samd9l
Epb41l2	Iqgap1
Dennd4a	Ivns1abp
Lpcat2	Slc1a3
Lair1	Itga4
Siglech	St8sia4
Csf3r	Tgfbr1
Arhgap5	Plxdc2
Itgb5	Neat1
A830008E24Rik	Nav2
Whrn	Ahnak
Slc1a3	H2-Aa
Dock4	Epb41l2
Abi3	Cd74
Pag1	Frmd4a
Pde3b	Clec10a
Tmem119	Mef2a
Mgat4a	Nav3
Cx3cr1	Tanc2
Bin2	Hexb
Dst	Rapgef5
Mertk	Siglech
Zfhx3	Dock4
Mlxipl	Nrp1
Herc2	Zfhx3
P2ry12	Ms4a6b
Lgmn	Numb
Ubash3b	H2-Eb1
Dip2b	Ms4a6c
Maml3	Ifi204
Pmepa1	Mertk
Ivns1abp	Gm26740
Fbrsl1	Myo5a
Cst3	P2ry12
Fgd2	Elmo1
Ptgs1	Arhgap5
Ccr5	Selplg
Golm1	Pde3b
Vsir	Lpcat2
Srgap2	Cd209f
Itga6	Lhfpl2
Ppcdc	Pag1
Tmcc3	Maml3
Sirpa	Itgb5
Adap2	Dennd4a
Elmo1	Lair1
Arhgef40	Oas2
Hps4	Col27a1
Inpp5d	Cx3cr1
Bin1	Inpp5d
Lrp1	Ubash3b
Slc7a8	Mlxipl
Ly86	Slfn2
Slco2b1	Csf3r
Hk2	H2-Ab1
Qk	Capn3
Trem2	Dst
Adap2os	Lgmn
Rgs10	Gtf2h2
Specc1	Dip2b
Entpd1	Qk
Chd9	Sall1
Rps6ka1	Mgat4a
Apbb1ip	Tmcc3
Cyfip1	Herc2
Ssbp2	Malat1
Ski	Chd9
St3gal6	Bin2
Camk1	Ints6l
Map4k4	Hk2
Gpr34	Sparc
Cttnbp2nl	Sirpa
Picalm	Ccr5
Gna15	Hip1
Rptor	Fgd2
Marcks	Utrn
Rasgrp3	Adap2
Dcakd	Pmepa1
Fam105a	Slco2b1
Pld1	Samhd1
Csf1r	Whrn
Mef2a	Abi3
Clasp2	Rps4x
Ints6l	Apbb1ip
Fam49b	Vsir
Foxn3	Ap2a2
Macf1	Bin1
Malat1	Gpr34
Cd209f	A830008E24Rik
Oas2	Ppcdc
Rps10	Apoe
Ifi204	Osbpl9
Dennd1a	Picalm
Rps4x	Ly86
Hip1	Tmem119
Rbms1	Cst3
Samhd1	Rgs10
Pde7a	Csf1r
Slfn2	Dclre1c
Cd47	Bcl2
Stk17b	Entpd1
Sp100	Macf1
Osbpl9	Ptgs1
Foxp1	Itga6
Ms4a6c	Adap2os
Snx2	St3gal6
Ap2a2	Fbrsl1
Rpl13	Cyfip1
Samd9l	Specc1
Utrn	Trem2
Pid1	Dennd1a
Nrp1	Rpl13
Bcl2	Lrp1
Dclre1c	Cd47
Ms4a6b	Rbms1
H2-K1	Rps10
H2-D1	Ski
Clec10a	Golm1
Ahnak	Arhgef40
Itga4	Map4k4
Iqgap1	Cttnbp2nl
Gm26740	Marcks
Stab1	Hps4
Clec2d	Snx2
Ifi203	Fam49b
Cmah	Fam105a
Neat1	Stk17b
Ms4a7	Stab1
St8sia4	Foxp1
Myo5a	Rasgrp3
Mndal	Slc7a8
F630028O10Rik	Rptor
Apoe	Foxn3
H2-Ab1	Camk1
Itsn1	Rps6ka1
H2-Eb1	Pld1
H2-Aa	Clasp2
Arhgap15	Ssbp2
Mrc1	Dcakd
Cd74	Pde7a
Dab2	Pid1
F13a1	Gna15
